# Supplementary material for: Efficacy and safety of anti-VEGF/VEGFR monotherapy and combination with immune checkpoint inhibitors for advanced or metastatic renal cell carcinoma: A network meta-analysis
Source: Research Square preprint supplement (doi:10.21203/rs.3.rs-7826015/v1), 2025-12-12
Supplement: Supplementary file 1 [file 7c48affda7395cd3e531a616.docx]

**Supplementary Material**

Supplementary Table S1 Basic characteristics of included patients

Supplementary Table S2 Comparison of the goodness of fit between the consistency model and the inconsistency model of PSRF values and DIC values

Supplementary Table S3 Results of efficacy inconsistency test

Supplementary Table S4 Results of safety inconsistency test

Supplementary Table S5 Publication bias detection

Supplementary Figure S1 Literature risk of bias graph

Supplementary Figure S2 Literature risk of bias traffic light graph

Supplementary Figure S3 Safety league table (A) Grade ≥3 AEs; (B) Discontinuations due to AEs; (C) Hypertension; (D) Fatigue; (E) Hand-foot syndrome.

Supplementary Figure S4 OS convergence diagnostic diagram

Supplementary Figure S5 PFS convergence diagnostic diagram

Supplementary Figure S6 ORR convergence diagnostic diagram

Supplementary Figure S7 Grade ≥3 AEs convergence diagnostic diagram

Supplementary Figure S8 Discontinuations due to AEs convergence diagnostic diagram

Supplementary Figure S9 Hypertension convergence diagnostic diagram

Supplementary Figure S10 Fatigue convergence diagnostic diagram

Supplementary Figure S11 Hand-foot syndrome convergence diagnostic diagram

Supplementary Figure S12 (A) Diagnosis Chart for the Asian Subgroup; (B) Diagnosis Chart for the Non-Asian Subgroup

Supplementary Figure S13 (A) Low-risk subgroup diagnosis chart; (B) Intermediate-risk subgroup diagnosis chart; (C) Intermediate-high-risk subgroup diagnosis chart; (D) High-risk subgroup diagnosis chart.

Supplementary Figure S14 Forest plot of OS heterogeneity

Supplementary Figure S15 Forest plot of PFS heterogeneity

Supplementary Figure S16 Forest plot of ORR heterogeneity

Supplementary Figure S17 Forest plot of ≥3 AEs heterogeneity

Supplementary Figure S18 Forest plot of Discontinuations due to AEs heterogeneity

Supplementary Figure S19 Forest plot of Hypertension heterogeneity

Supplementary Figure S20 Forest plot of Fatigue heterogeneity

Supplementary Figure S21 Figure plot of Hand-foot syndrome heterogeneity

Supplementary Figure S22 ORR Sensitivity Analysis

Supplementary Figure S23 The funnel plot for efficacy and safety

Appendix

**Supplementary Table S1** Basic characteristics of included patients

| Study | Sample Size | Male Proportion | Median Age | | ECOG Score | Follow-up Time (months) | Asian Population | Low Risk | Medium Risk | | High Risk |
| --- | --- | --- | --- | --- | --- | --- | --- | --- | --- | --- | --- |
| Brian.I 2013 | 56/56 | 67%/67% | | 62/62 | 0、1 | 26.5 | NA | NA | NA | NA | |
| ECOG-ACR2023 | 45/37 | 67%/65% | | 59/61 | 0-2 | NA | 0/1 | 8/10 | 16/11 | 14/12 | |
| TIVO-1 2013 | 260/257 | 71%/89% | | 59/59 | 0、1 | NA | 10/7 | 70/87 | 173/160 | 17/10 | |
| IMmotion1512019 | 454/461 | 67%/79% | | 62/59 | 0、1 | 15 | 80/73 | 89/90 | 311/318 | 54/53 | |
| CLEAR 2024 | 355/357 | 72%/78% | | 64/61 | 0、1 | 49.8 | 75/65 | 110/124 | 210/192 | 32/32 | |
| Haanen.G2023 | 442/444 | 75%/85% | | 60/57 | 0、1 | 33.6 | NA | 94/96 | 270/276 | 73/71 | |
| CheckMate9ER  2024 | 323/328 | 78%/78% | | 62/62 | 0、1 | 44.0 | NA | 74/72 | 188/188 | 61/68 | |
| RENOTORCH  2023 | 210/211 | 77.%/74% | | 60/60 | 0、1 | 14.6 | 210/211 | NA | 169/174 | 41/37 | |
| IMmotion150 2020 | 101/101 | 73%/78% | | 62/61 | 0、1 | 20.7 | NA | 30/21 | 62/70 | 9/10 | |
| PAPMET 2024 | 44/46 | 76%/76% | | 68/68 | 0、1 | 17.5 | NA | 38/14 | 89/26 | 20/6 | |
| KEYNOTE 2020 | 432/429 | 71%/75% | | 62/61 | 0、1 | 30.6 | 62/68 | 138/131 | 238/246 | 56/52 | |
| CABOSUN 2018 | 79/78 | 84%/73% | | 63/64 | NA | 34.5 | NA | NA | 64/63 | 15/15 | |
| RESTORE 2015 | 38/36 | 79%/89% | | 57/60 | 0-2 | 30.0 | 38/36 | 7/7 | 19/19 | 12/10 | |
| RenalEFFECT 2012 | 146/146 | 69%/61% | | 61/64 | NA | NA | NA | 37/29 | 87/84 | 22/33 | |
| Hutson.E 2017 | 192/96 | 73%/73% | | 58/58 | 0、1 | NA | 72/48 | 28 | 4 |  | |
| COMPARZ2013 | 186/177 | 73%/77% | | 59/59 | 0、1 | 14.1-14.3 | 186/177 | 151/152 | 322/  328 | 67/52 | |
| CABOSUNII2023 | 15/17 | 72%/72% | | 57/61 | NA | 33.3 | NA | 133/14 | NA | NA | |
| VEG1051922010 | 290/145 | 68%/75% | | 59/60 | 0、1 | NA | NA | 113/57 | 159/77 | 9/5 | |
| ETER1002024 | 266/265 | NA | | NA | 0、1 | 19.5 | 266/  265 | NA | NA | NA | |
| Zhou.A.P2019 | 90/43 | 73%/79% | | 53/57 | 0、1 | NA | 90/43 | 8/5 | 63/30 | 19/8 | |
| TARGET2007 | 451/452 | 70%/75% | | 58/59 | 0、1 | 6.6 | NA | 223/228 | 228/223 | 0/1 | |
| CROSS-J 2020 | 57/63 | 81%/84% | | 67/66 | 0-2 | NA | 57/63 | 12/14 | 45/49 | NA | |
| SWITCHII2019 | 189/188 | 73%/73% | | 68/68 | NA | NA | NA | 95/91 | 90/89 | NA | |
| SWITCH2015 | 182/183 | 75%/75% | | 65/65 | 0、1 | 10.3 | NA | 71/82 | 108/94 | 1/1 | |

**Supplementary Table S2** Comparison of the goodness of fit between the consistency model and the inconsistency model of PSRF values and DIC values

|  |  | Model | | | |
| --- | --- | --- | --- | --- | --- |
|  | PRSF | Consistency | | Inconsistency | |
|  |  | DIC | I2 | DIC | I2 |
| PFS | 1.0043 | 30.0291 | 0% | 31.3667 | 0% |
| OS | 1.0060 | 36.6843 | 0.2% | 39.5235 | 0.4% |
| ORR | 1.0002 | 90.1834 | 0.06% | 90.9163 | 0% |
| Grade ≥3 AEs | 1.0006 | 64.8159 | 0.9% | 67.1214 | 2% |
| Discontinuations due to AEs | 1.0005 | 69.3138 | 0.09% | 68.8095 | 0% |
| Hypertension | 1.0002 | 64.2993 | 4% | 63.9815 | 3% |
| Fatigue | 1.0014 | 51.7881 | 4% | 52.7614 | 6% |
| Hand-foot syndrome | 1.0006 | 58.9750 | 2% | 60.6029 | 4% |
| Asian subgroup | 1.0001 | 15.9593 | 12% | 16.0309 | 13% |
| Non-Asian subgroup | 1.0004 | 15.2013 | 9% | 15.2256 | 9% |
| Low-risk subgroup | 1.0009 | 19.5106 | 8% | 19.3941 | 8% |
| Intermediate-risk subgroup | 1.0002 | 15.3327 | 10% | 15.2586 | 10% |
| Intermediate-high-risk subgroup | 1.0002 | 8.0008 | 15% | 7.982237 | 15% |
| High-risk subgroup | 1.0001 | 8.0014 | 15% | 8.005243 | 15% |

**Supplementary Table S3** Results of efficacy inconsistency test

| Outcomes | Comparison  group | Direct | Indirect | Network | P |
| --- | --- | --- | --- | --- | --- |
| OS | Sora vs Pazo | 1.20 (0.72-2.10) | 1.10 (0.60-2.10) | 1.20 (0.84-1.70) | 0.789 |
| OS | Suni vs Pazo | 1.11 (0.67-1.80) | 1.20 (0.61-2.30) | 1.10 (0.81-1.60) | 0.790 |
| OS | Suni vs Sora | 0.98 (0.65-1.4) | 0.90 (0.43-1.80) | 0.96 (0.71-1.30) | 0.782 |
| PFS | Plac vs Pazo | 2.20 (1.40-3.40) | 1.90 (1.20-3.20) | 2.0 (1.60-2.70) | 0.657 |
| PFS | Sora vs Pazo | 1.40 (0.92-2.00) | 1.20 (0.83-2.00) | 1.3 (1.00-1.70) | 0.674 |
| PFS | Suni vs Pazo | 0.95.(0.67-1.40) | 1.10 (0.75-1.60) | 1.0 (0.81-1.30) | 0.482 |
| PFS | Suni vs Plac | 0.51 (0.35-0.74) | 0.45 (0.27-0.78) | 0.50 (0.38-0.63) | 0.661 |
| PFS | Suni vs Sora | 0.80 (0.57-1.10) | 0.72 (0.45-1.20) | 0.77 (0.61-0.96) | 0.670 |
| ORR | Plac vs Axit | 0.43 (0.16-1.11) | 0.13(0.034-0.44) | 0.27(0.12-0.62) | 0.113 |
| ORR | Sora vs Axit | 0.81 (0.33-2.00) | 2.90(0.77-11.0) | 1.20(0.55-2.7) | 0.105 |
| ORR | Plac vs Pazo | 0.059(0.0140.19) | 0.15(0.055-0.4) | 0.11(0.048-0.22) | 0.204 |
| ORR | Sora vs Pazo | 0.46(0.17-1.30) | 0.50(0.14-1.20) | 0.49(0.24-0.83) | 0.887 |
| ORR | Suni vs Pazo | 0.74(0.32-1.7) | 0.46(0.18-1.2) | 0.64(0.34-1.10) | 0.344 |
| ORR | Suni vs Plac | 6.30(2.00-21.0) | 5.50(1.8-18.0) | 5.80(2.90-12.0) | 0.853 |

Sora: Sorafenib; Pazo: Pazopanib; Suni: Sunitinib; Axit: Axitinib; Plac: placebo;OS: overall survival; PFS: progression free survival; ORR: objective remission rate.

**Supplementary Table S4** Results of safety inconsistency test

| Outcomes | Comparison  group | Direct | Indirect | Network | P |
| --- | --- | --- | --- | --- | --- |
| ≥3 AEs | Sora vs Pazo | 0.82(0.20-3.5) | 0.67(0.10-3.5) | 0.76(0.32-1.60) | 0.751 |
| ≥3 AEs | Suni vs Pazo | 0.85(0.21-3.5) | 1.0(0.20-7.0) | 0.89(0.43-2.1) | 0.760 |
| ≥3 AEs | Suni vs Sora | 1.3(0.49-4.2) | 1.0(0.14-7.5) | 1.2(0.64-2.7) | 0.738 |
| DAE | Plac vs Axit | 0.17(0.016-1.8) | 0.052(0.0013-2.3) | 0.12(0.02-0.74) | 0.398 |
| DAE | Sora vs Axit | 0.45(0.043-4.6) | 1.4(0.031-60.0) | 0.59(0.10-3.6) | 0.396 |
| DAE | Sora vs Pazo | 10(0.98-110) | 3.3(0.086-14) | 7.2(1.3-46) | 0.401 |
| DAE | Suni vs Pazo | 1.2(0.24-6.9) | 4.0(0.066-25)1 | 1.5(0.38-6.1) | 0.397 |
| DAE | Suni vs Plac | 1.30(0.62-2.7) | 0.85(0.082-11.0) | 1.30(0.62-2.40) | 0.753 |
| DAE | Suni vs Sora | 0.59(0.31-1.2) | 0.54(0.21-1.6) | 0.57(0.36-0.94) | 0.881 |
| HYP | Plac vs Pazo | 0.17(0.016-1.8) | 0.052(0.0013-2.3) | 0.12(0.02-0.74) | 0.398 |
| HYP | Sora vs Pazo | 0.45(0.043-4.6) | 1.4(0.031-60.0) | 0.59(0.10-3.6) | 0.396 |
| HYP | Suni vs Plac | 10(0.98-110) | 3.3(0.086-14) | 7.2(1.3-46) | 0.401 |
| HYP | Suni vs Sora | 1.2(0.24-6.9) | 4.0(0.066-25)1 | 1.5(0.38-6.1) | 0.397 |
| FAT | Sora vs Pazo | 0.73(0.22-2.4) | 0.92(0.21-3.9) | 0.81(0.40-0.1.6) | 0.683 |
| FAT | Suni vs Pazo | 1.4(0.44-4.4) | 1.1(0.26-4.9) | 1.3(0.65-2.5) | 0.673 |
| FAT | Suni vs Sora | 1.5(0.65-3.6) | 1.9(0.38-9.9) | 1.6(0.89-2.9) | 0.677 |
| HFS | Sora vs Pazo | 0.69(0.51-13) | 4.8(0.27-86) | 5.2(1.3-27.0) | 0.790 |
| HFS | Suni vs Pazo | 2.0(0.20-19.0) | 2.8(0.13-78) | 2.0(0.53-9.4) | 0.783 |
| HFS | Suni vs Sora | 0.41(0.074-2.2) | 0.28(0.0072-9.1) | 0.39(0.12-1.3) | 0.799 |

Abbreviations: ≥3 AEs: ≥3 grade adverse events; DAE: due to discontinuation of AE treatment; HYP: hypertension; FAT: fatigue; HFS: hand-foot syndrome

**Supplementary Table S5** Publication bias detection

| Outcome Indicator | Egger Test P-value | Begg Test P-value |
| --- | --- | --- |
| PFS | 0.278 | 0.820 |
| OS | 0.686 | 0.902 |
| ORR | 0.318 | 0.901 |
| Grade ≥3 AEs | 0.712 | 0.343 |
| Discontinuations due to AEs | 0.278 | 0.820 |
| Hypertension | 0.509 | 0.685 |
| Fatigue | 0.213 | 0.428 |
| Hand-foot syndrome | 0.212 | 0.232 |
| Asian subgroup | 0.442 | 0.386 |
| Non-Asian subgroup | 0554 | 0.236 |
| Low-risk subgroup | 0.103 | 0.210 |
| Intermediate-risk subgroup | 0.314 | 0.764 |
| Intermediate-high-risk subgroup | 0.552 | 0.470 |
| High-risk subgroup | 0.111 | 0.221 |


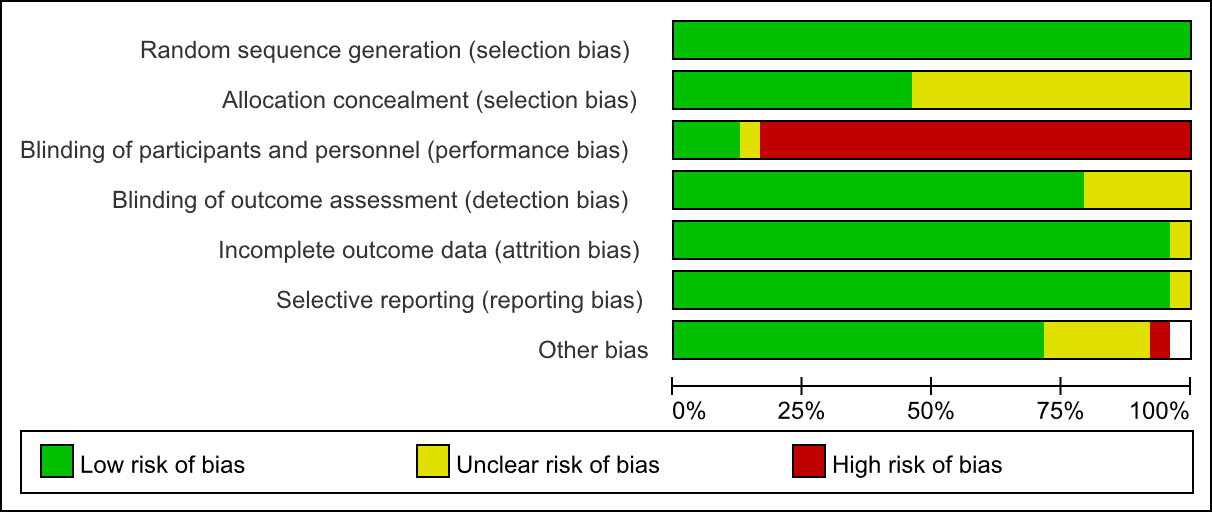


**Supplementary Figure S1** Literature risk of bias graph


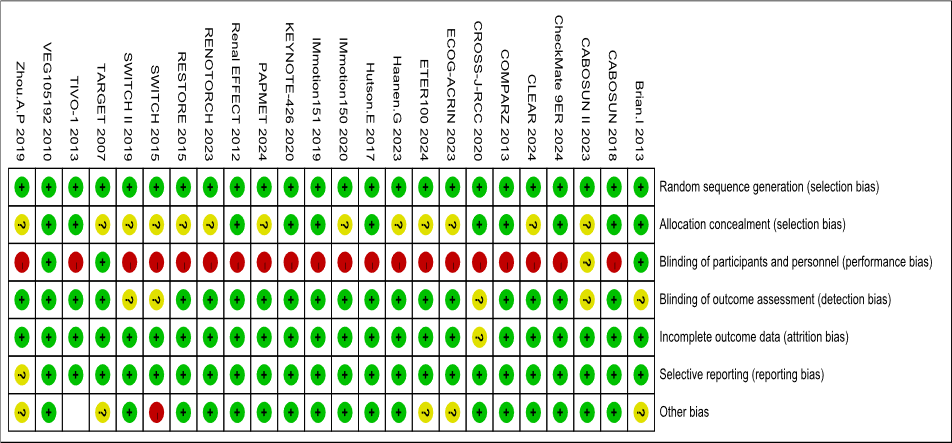


**Supplementary Figure S2** Literature risk of bias traffic light graph


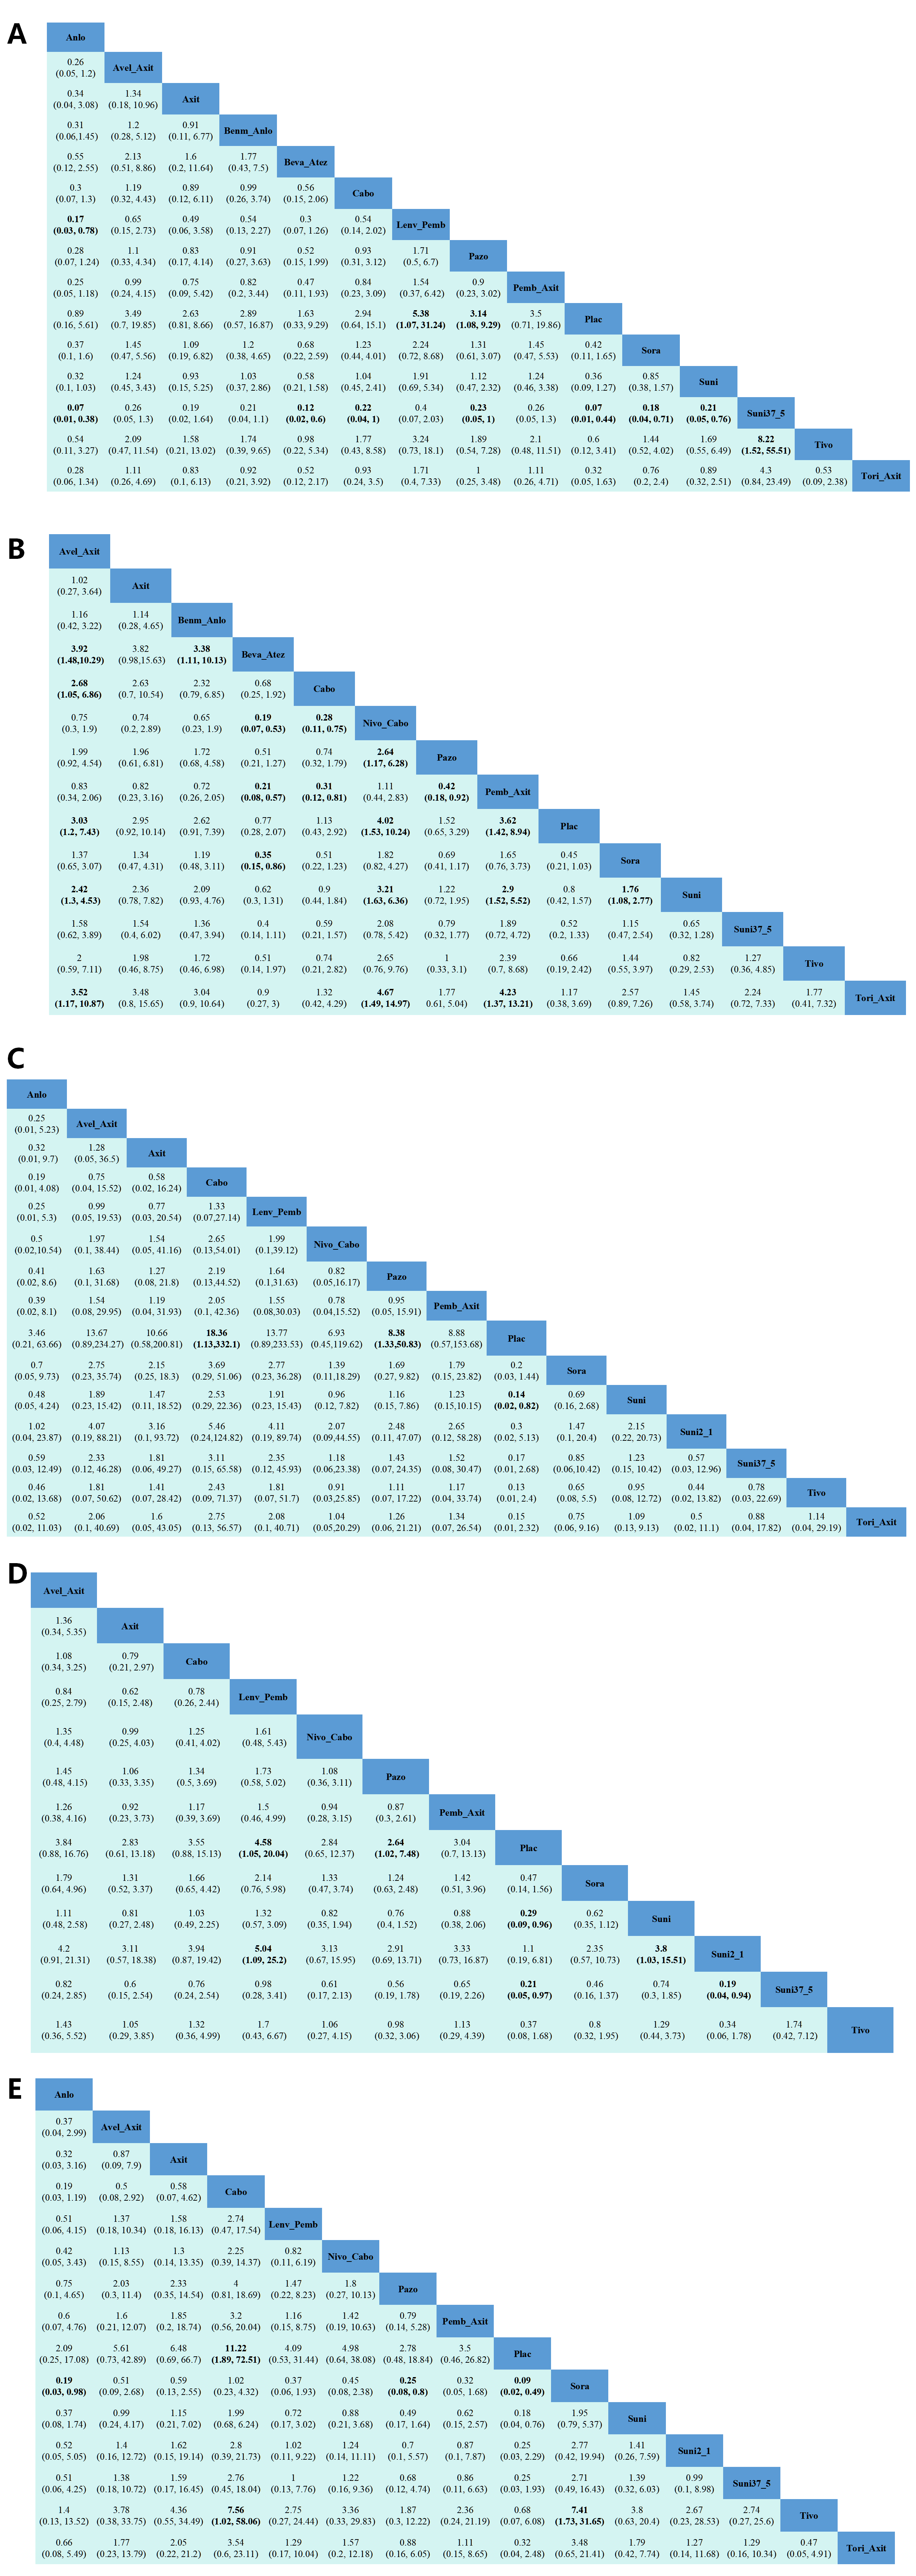


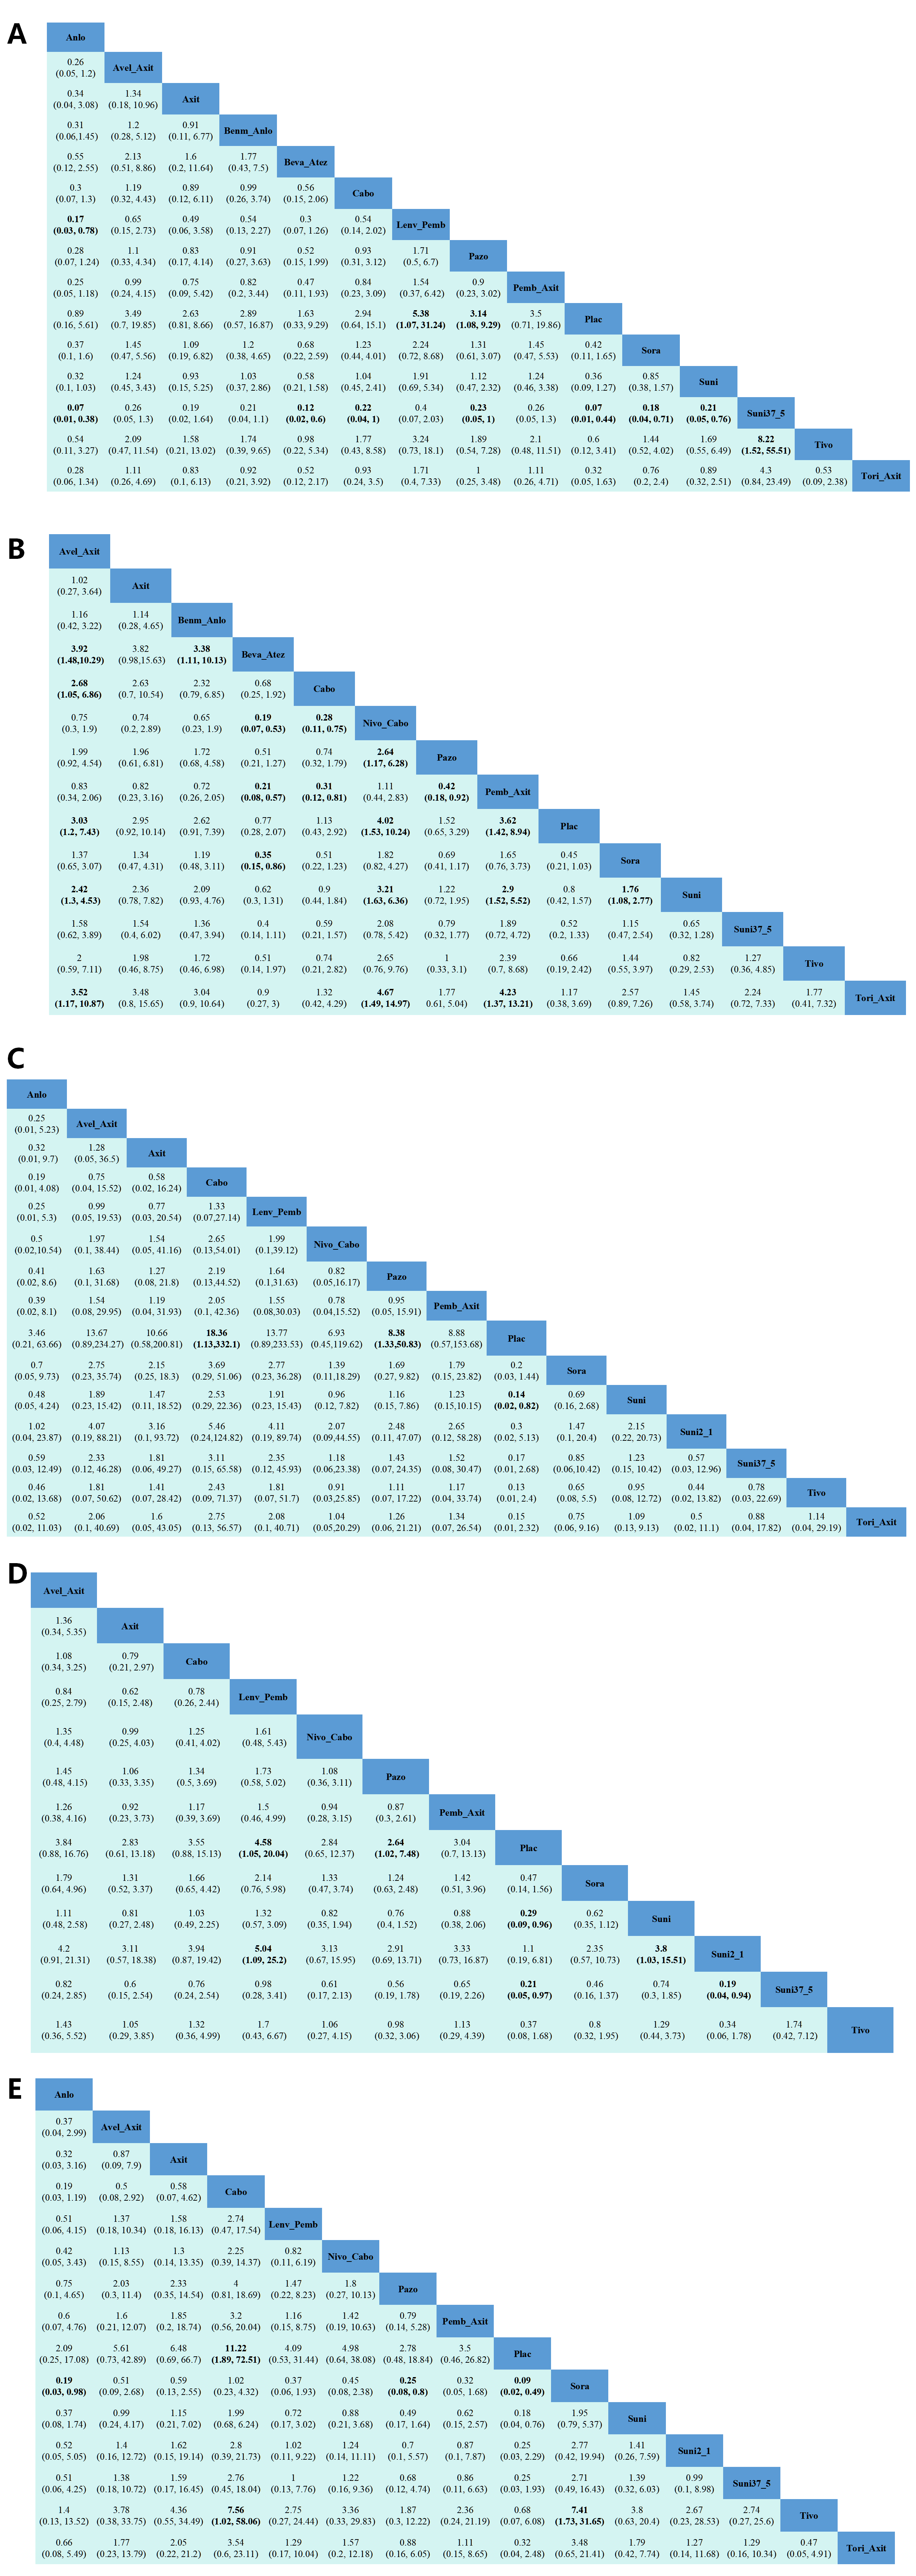


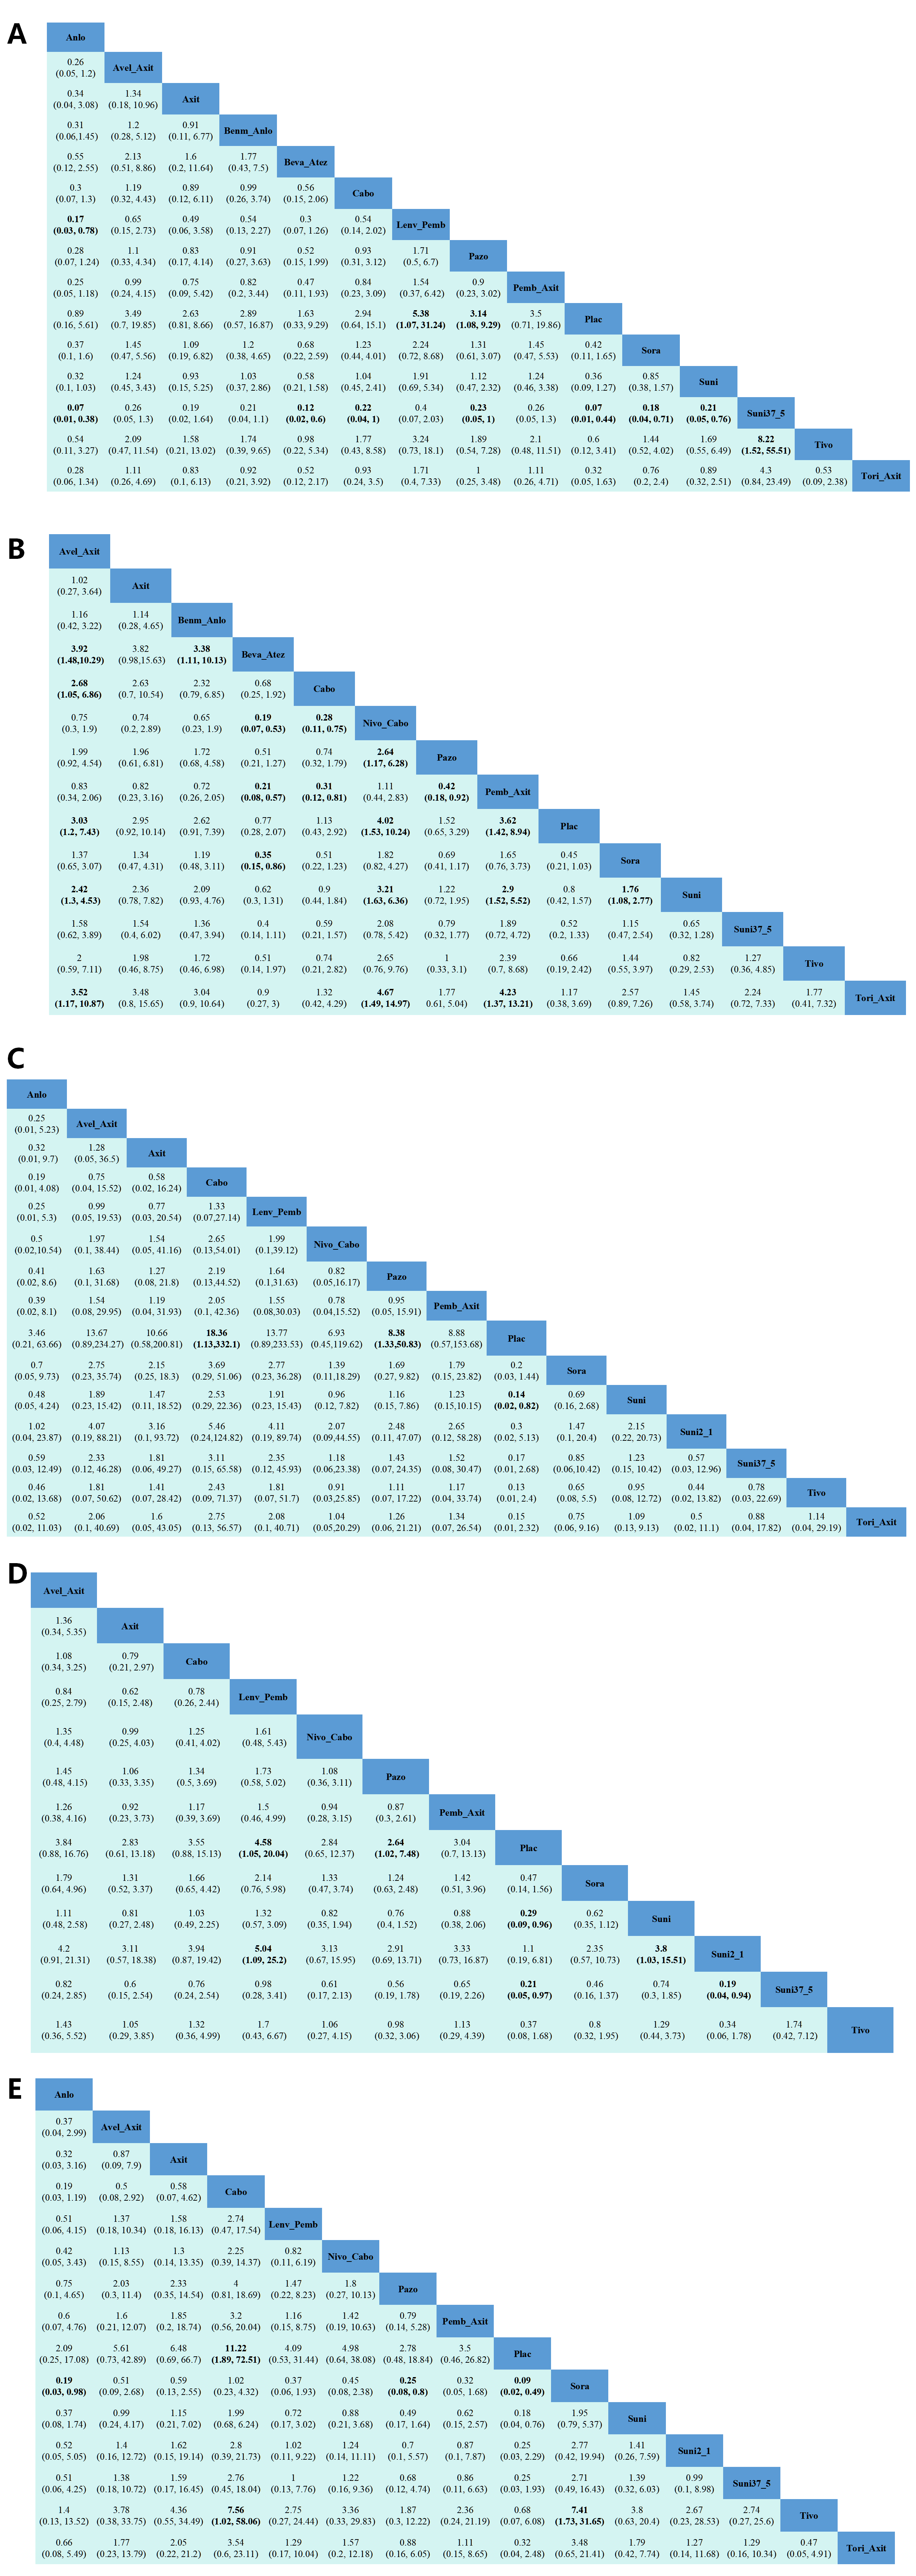


**Supplementary Figure S3** Safety league table (A) Grade ≥3 AEs; (B) Discontinuations due to AEs; (C) Hypertension; (D) Fatigue; (E) Hand-foot syndrome.


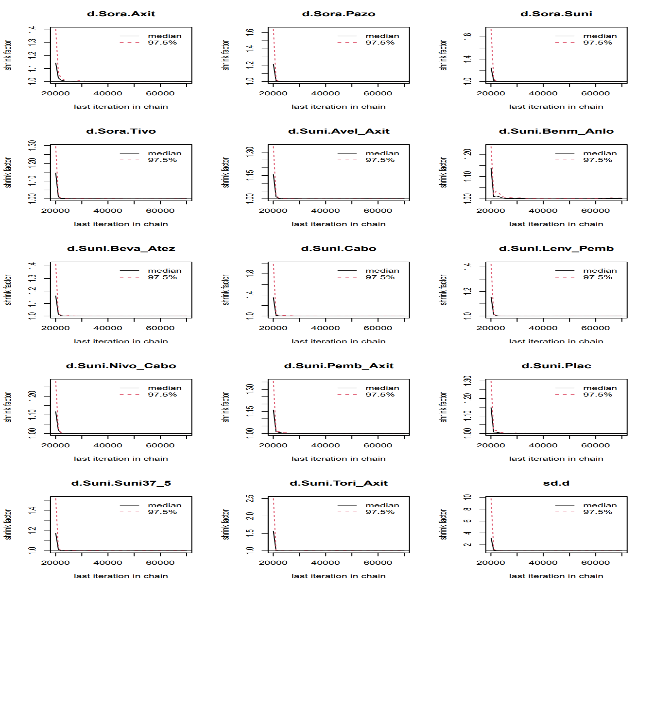

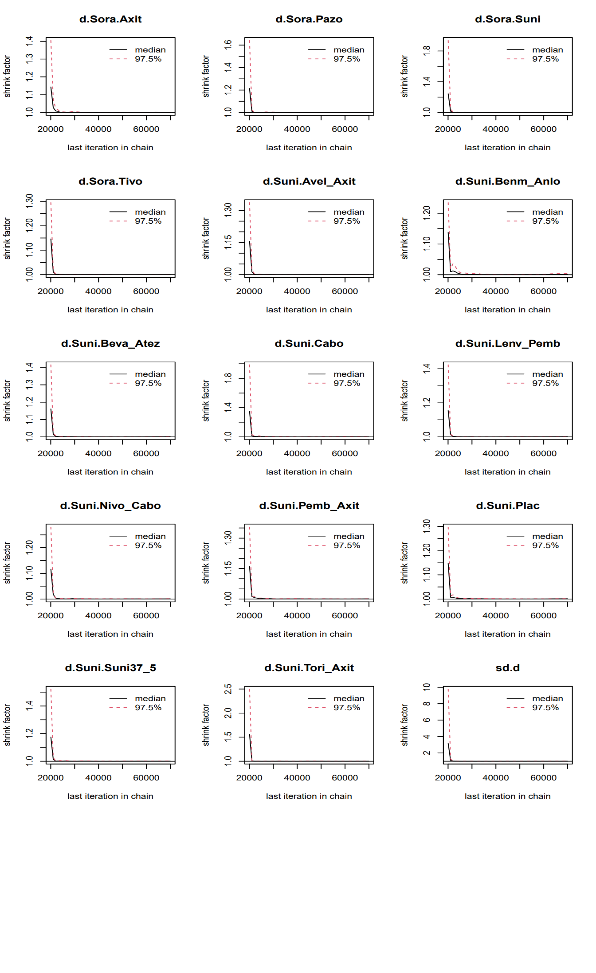


**Supplementary Figure S4** OS convergence diagnostic diagram


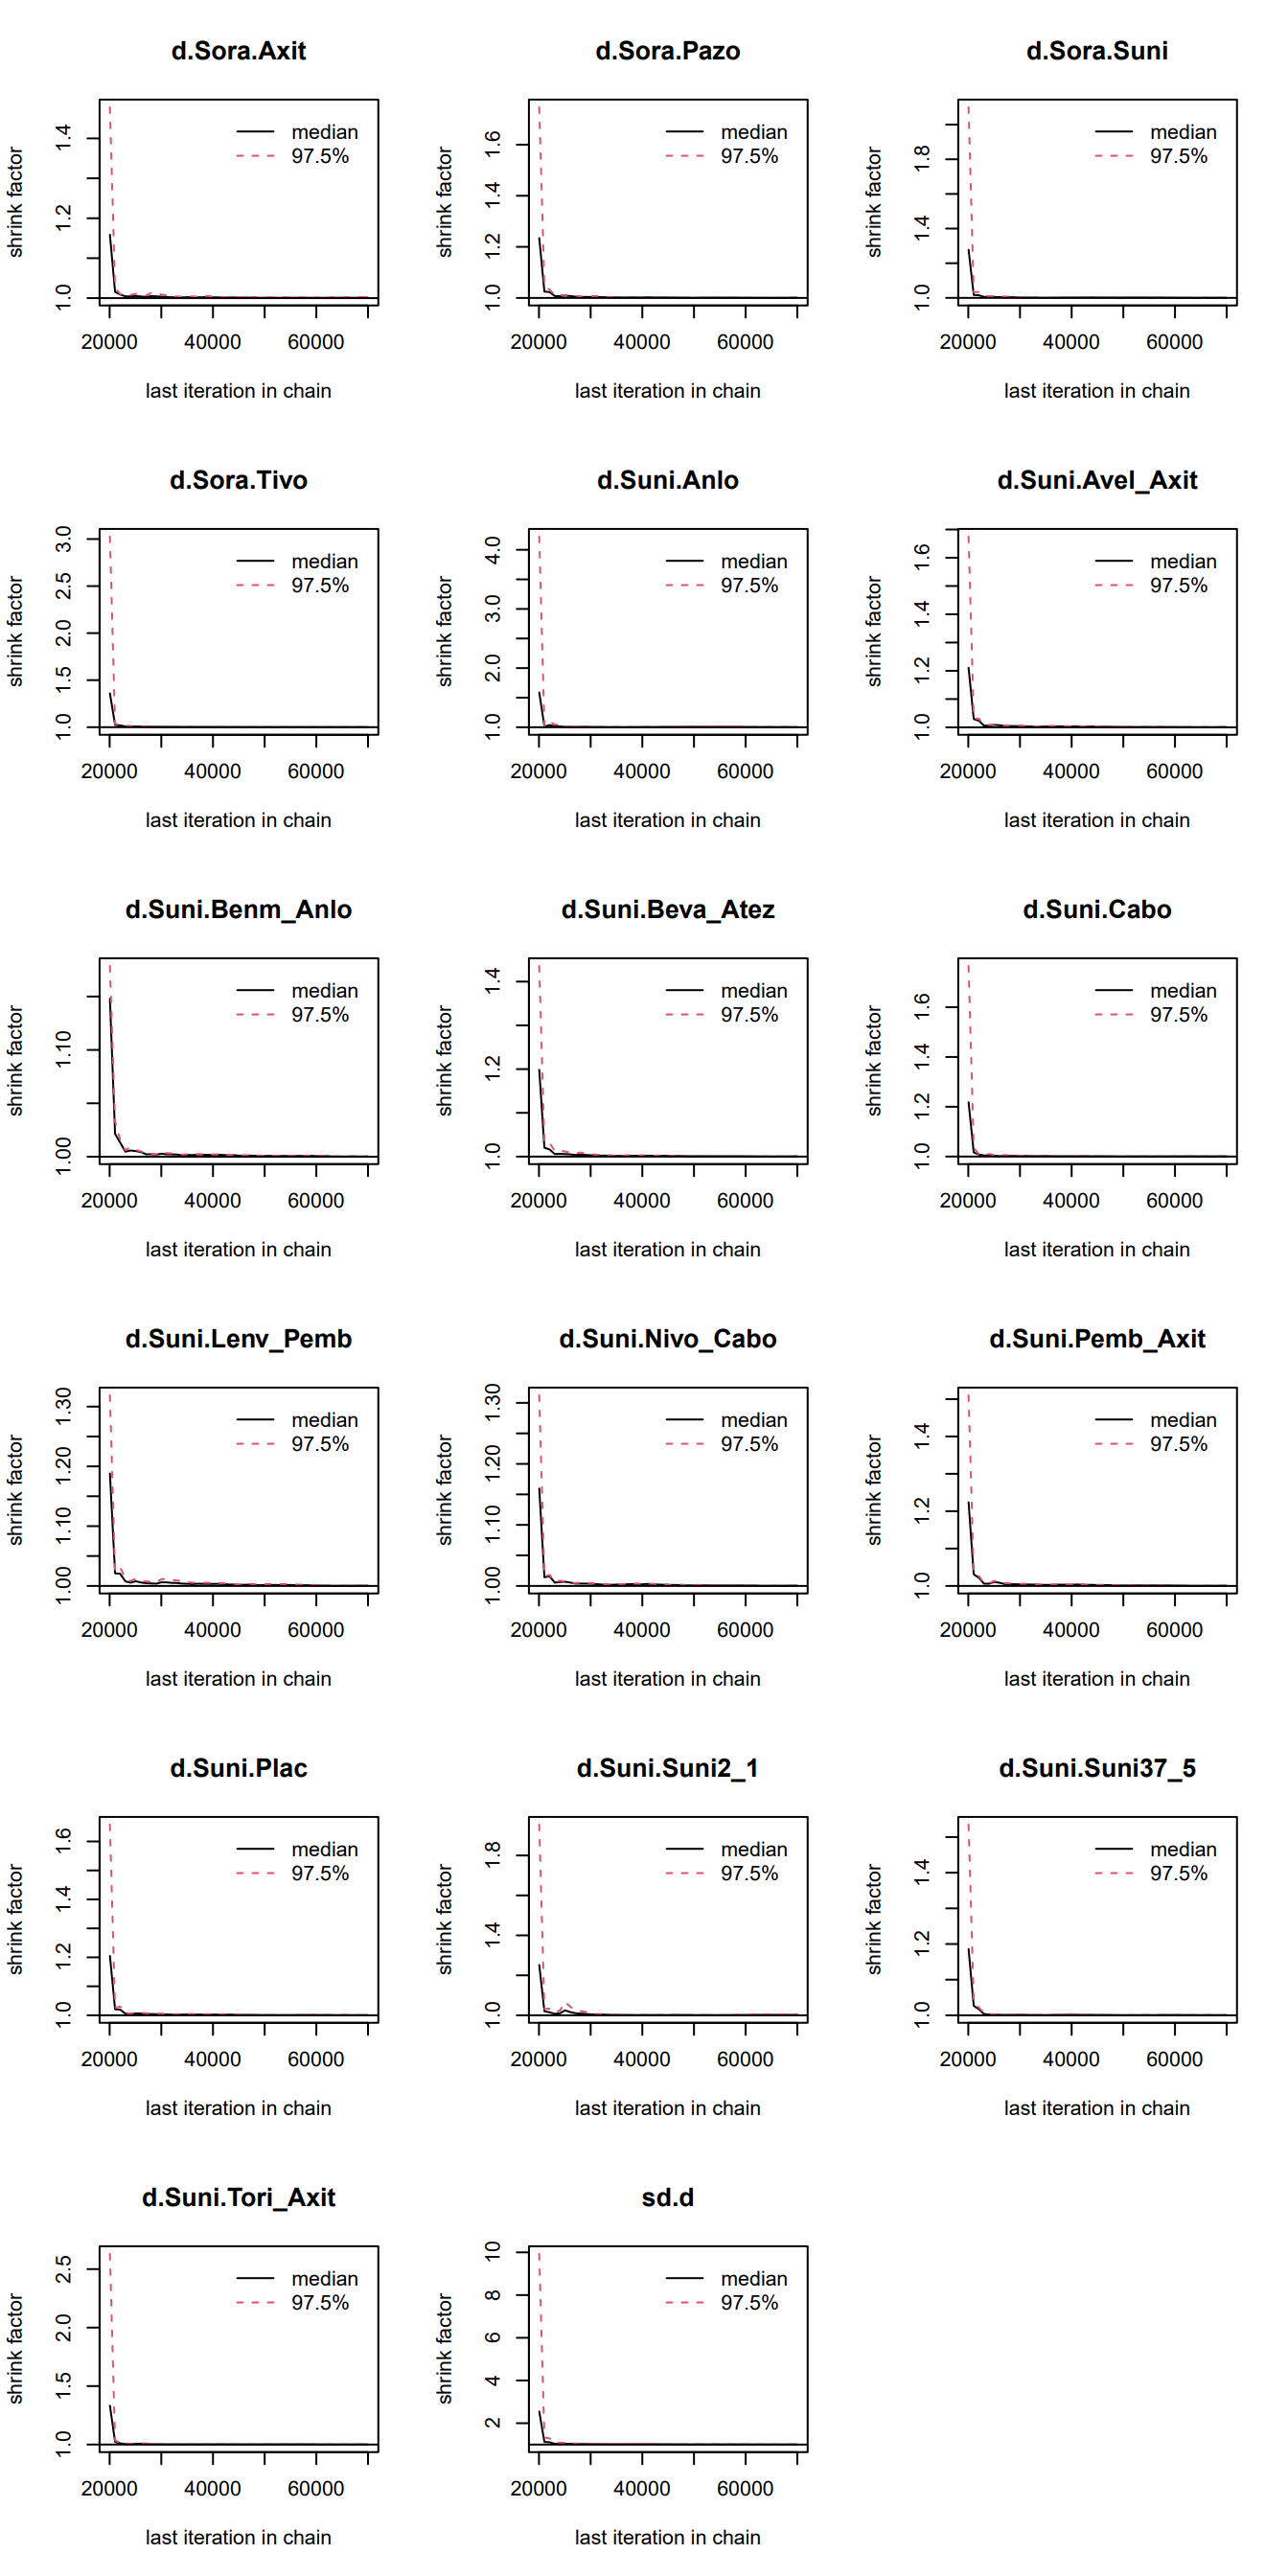

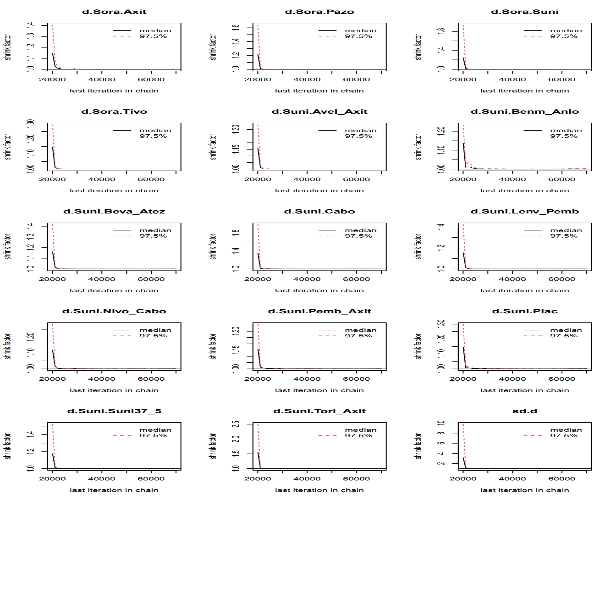


**S****upplementary Figure S5** PFS convergence diagnostic diagram


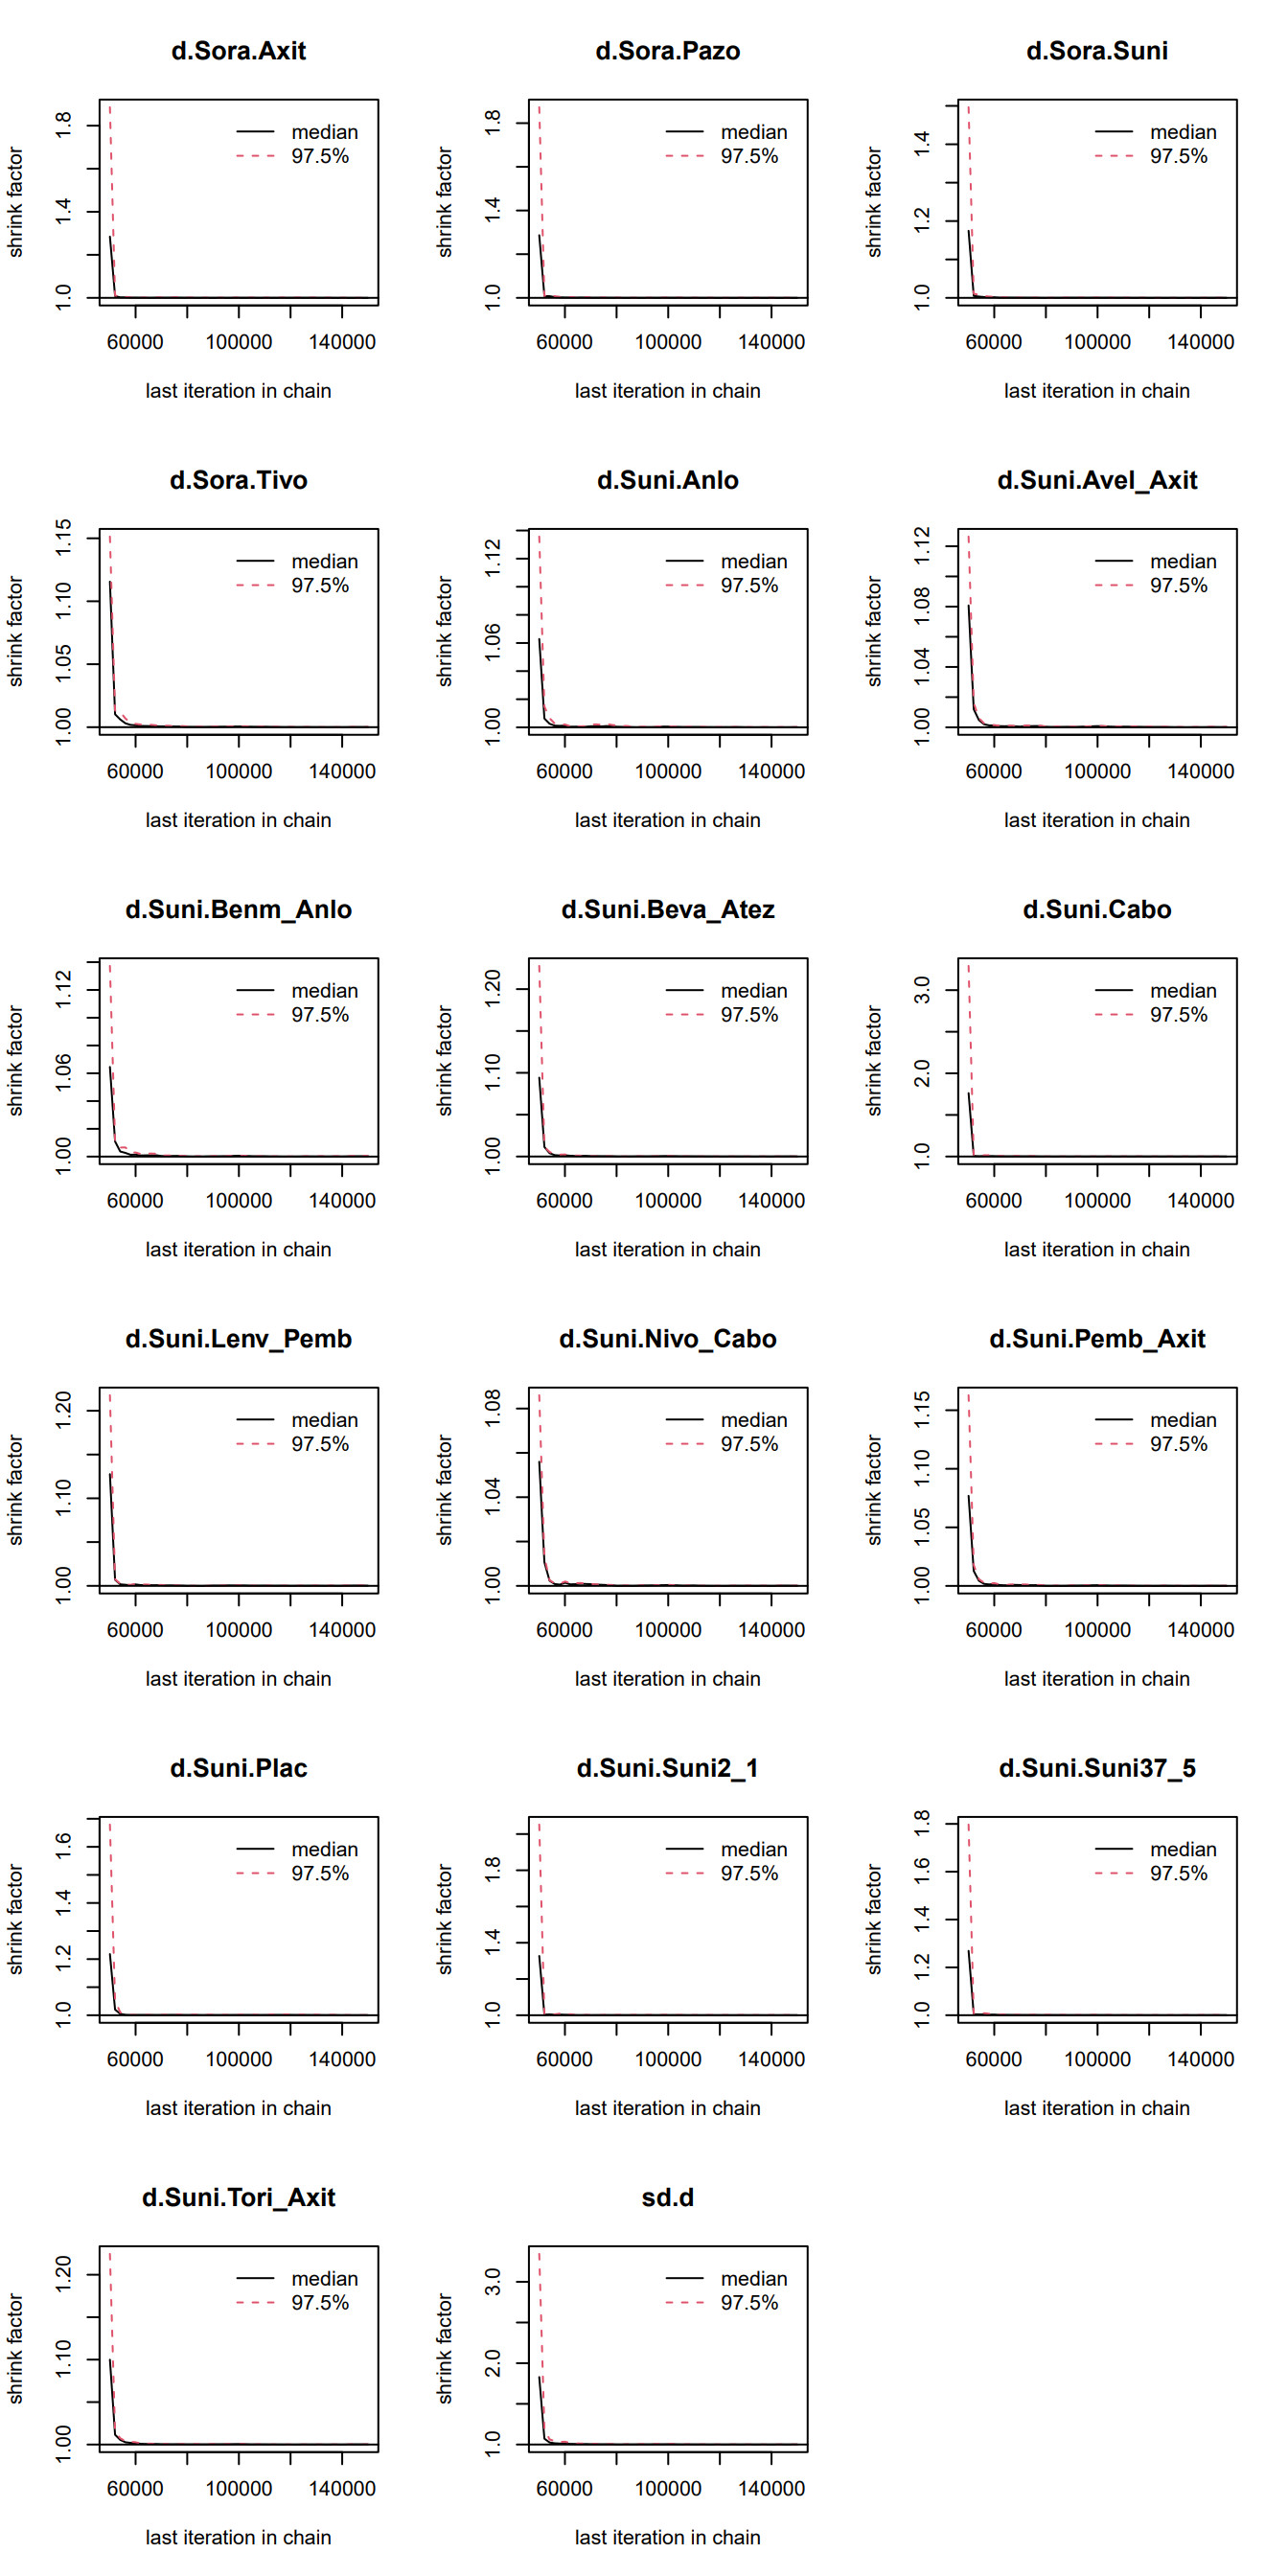

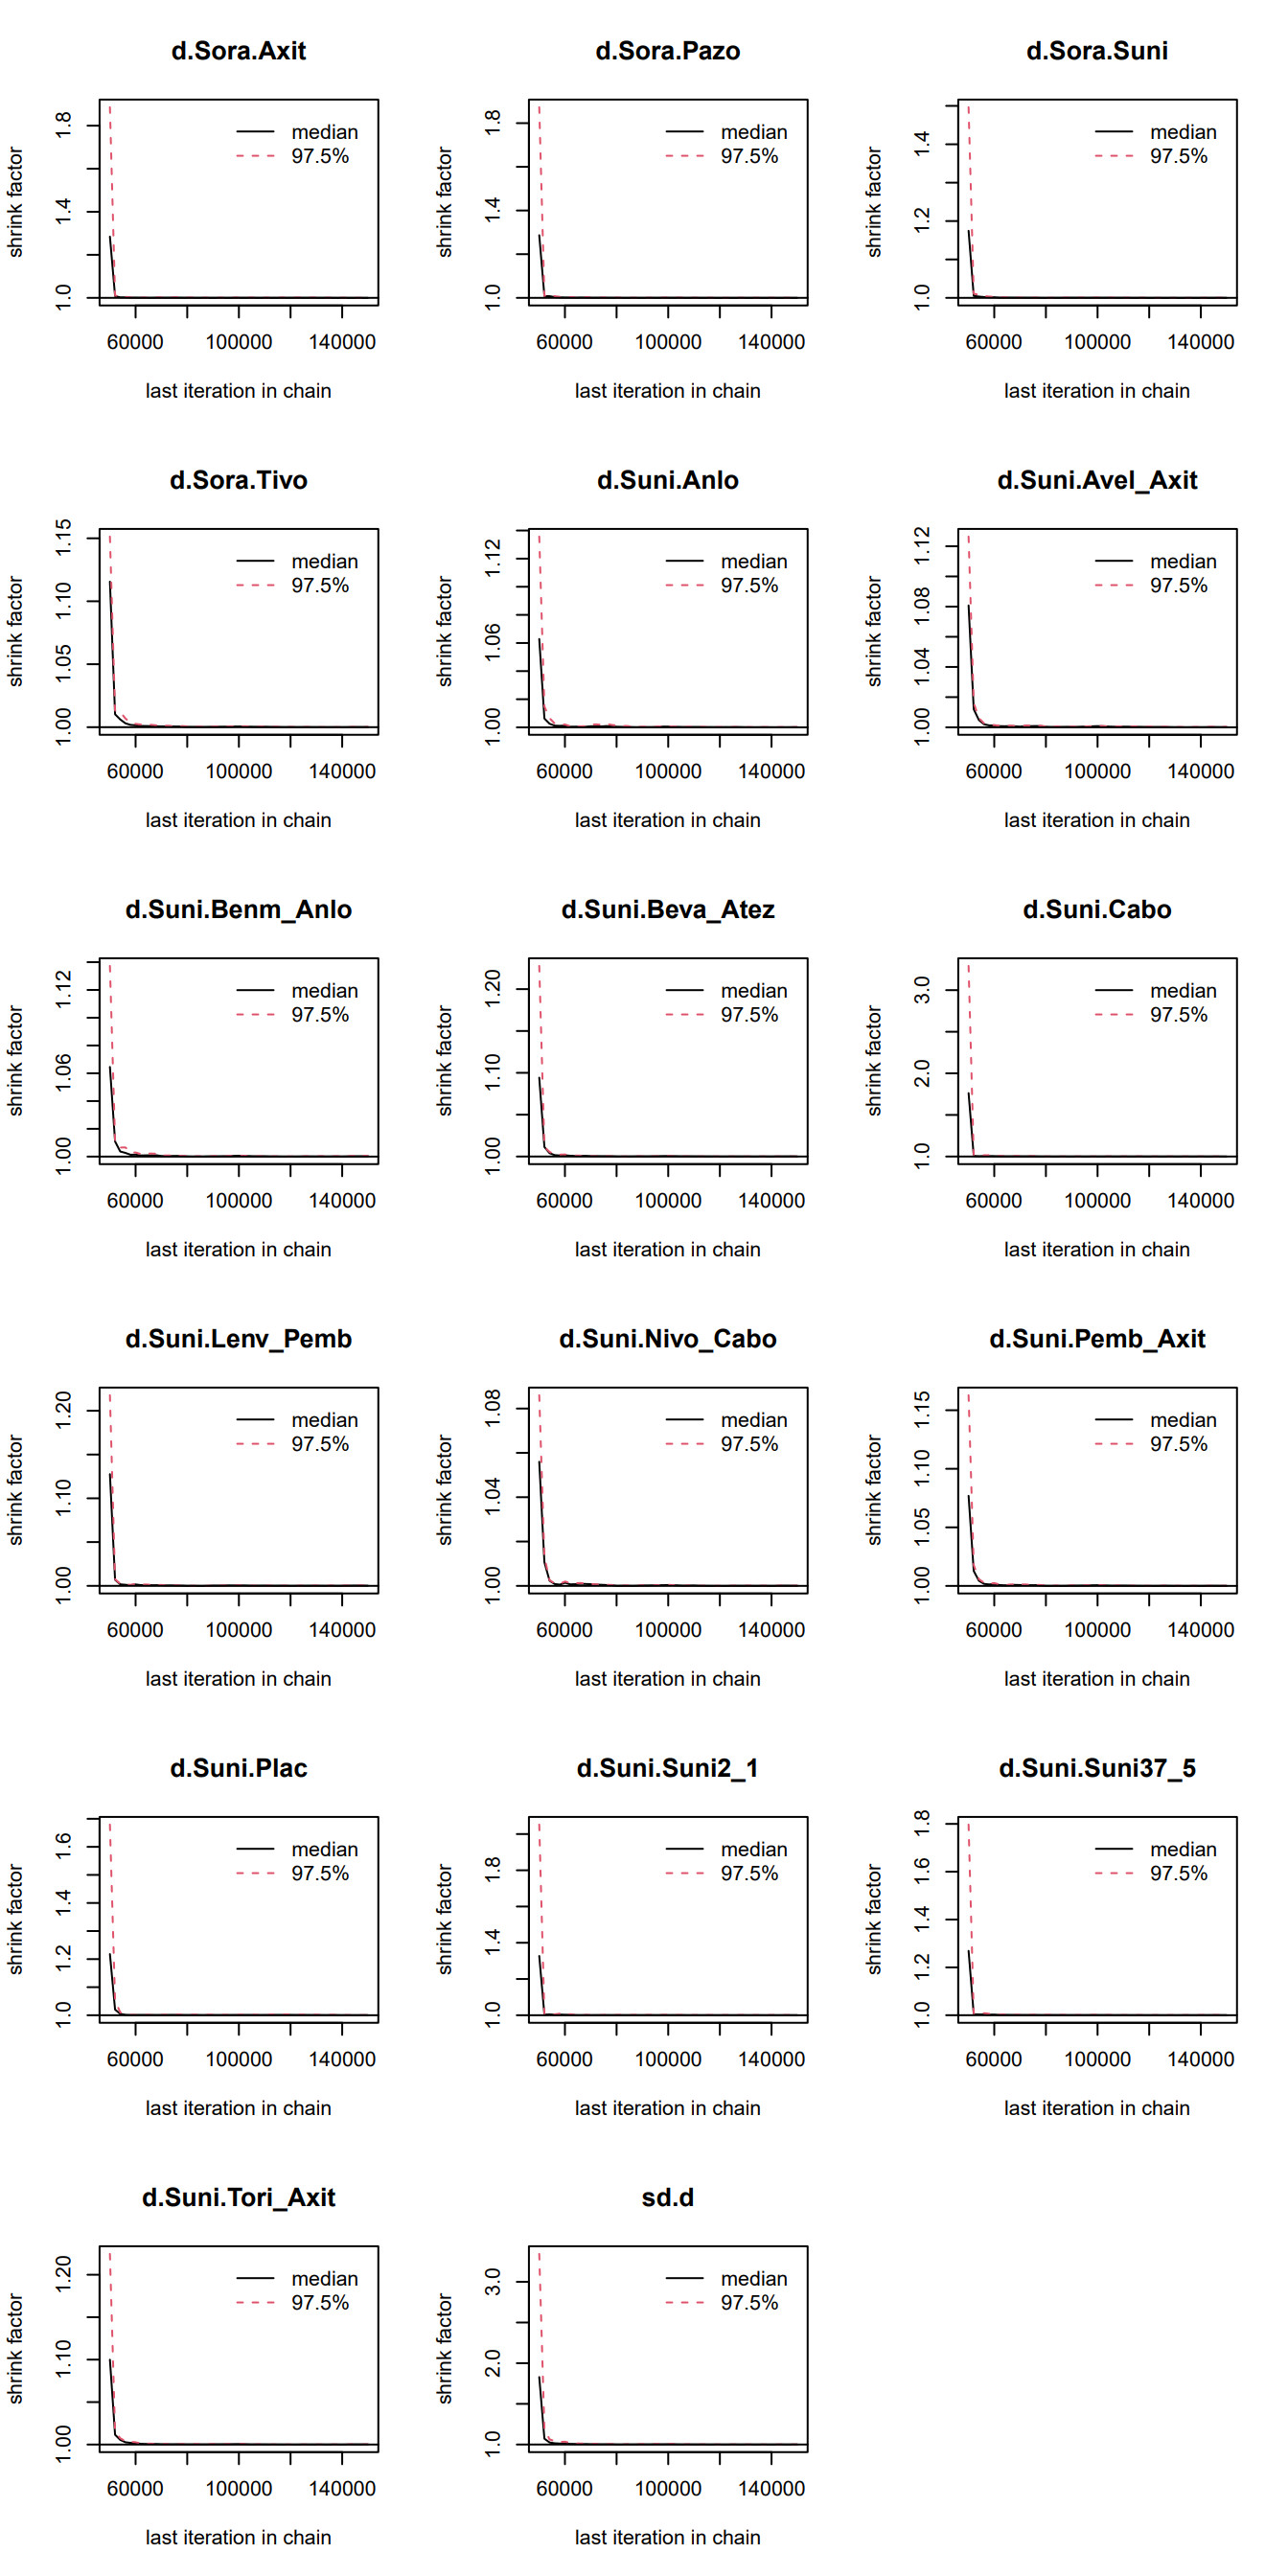


**Supplementary Figure S6** ORR convergence diagnostic diagram


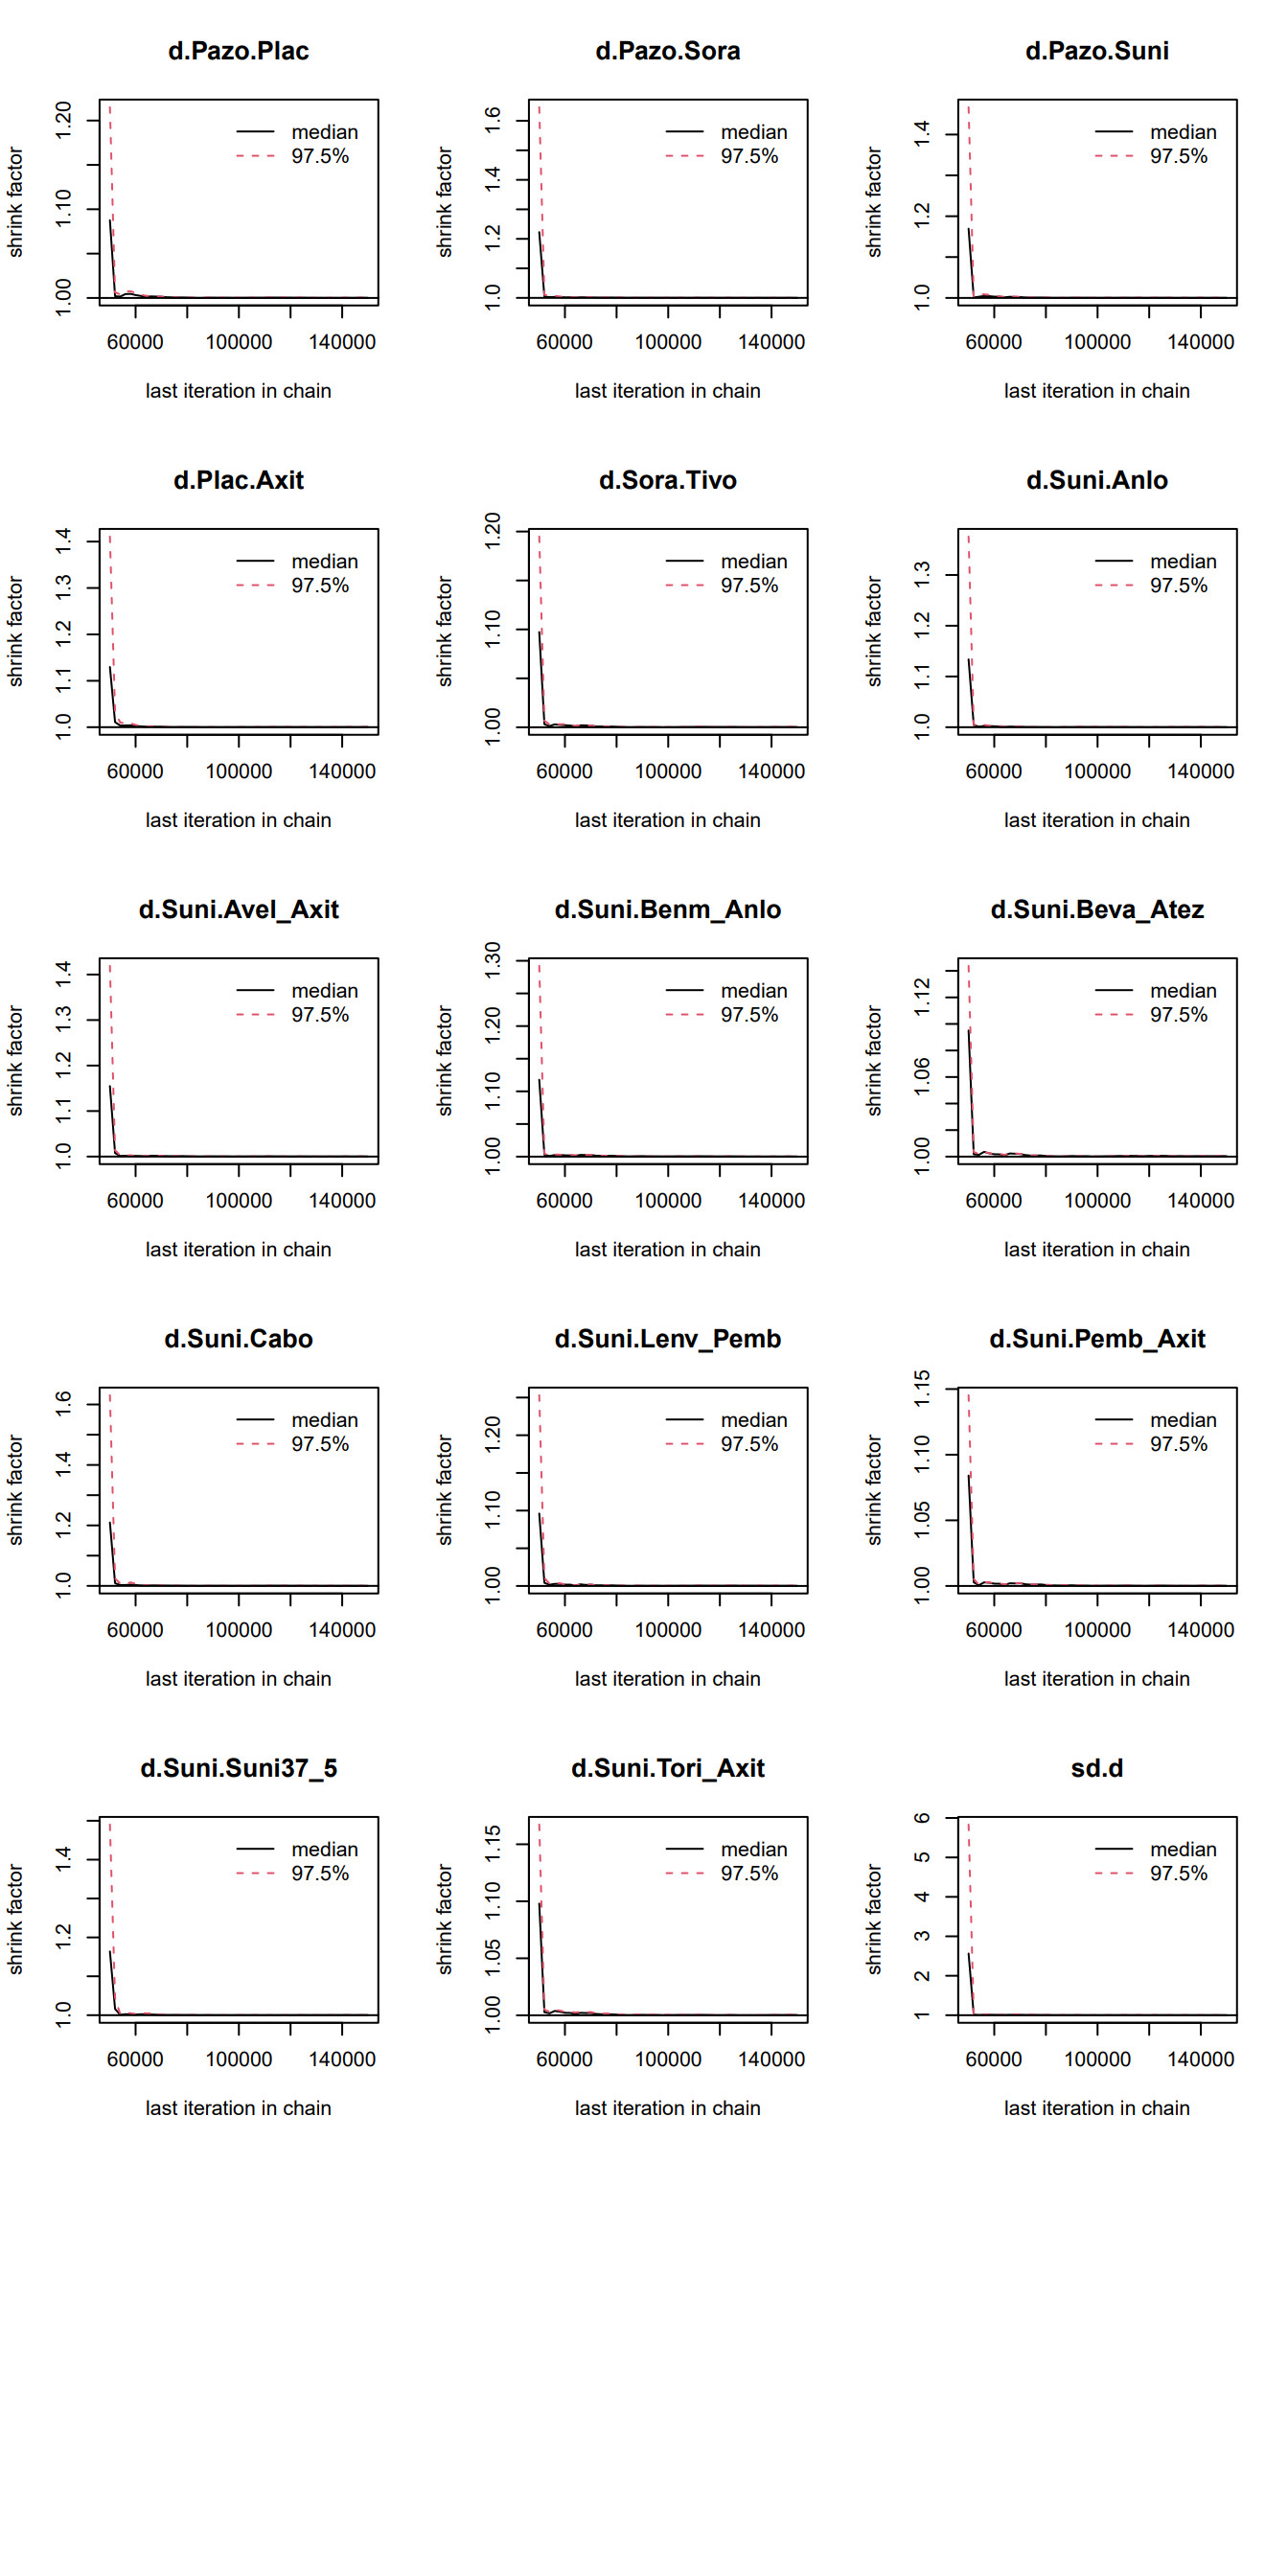

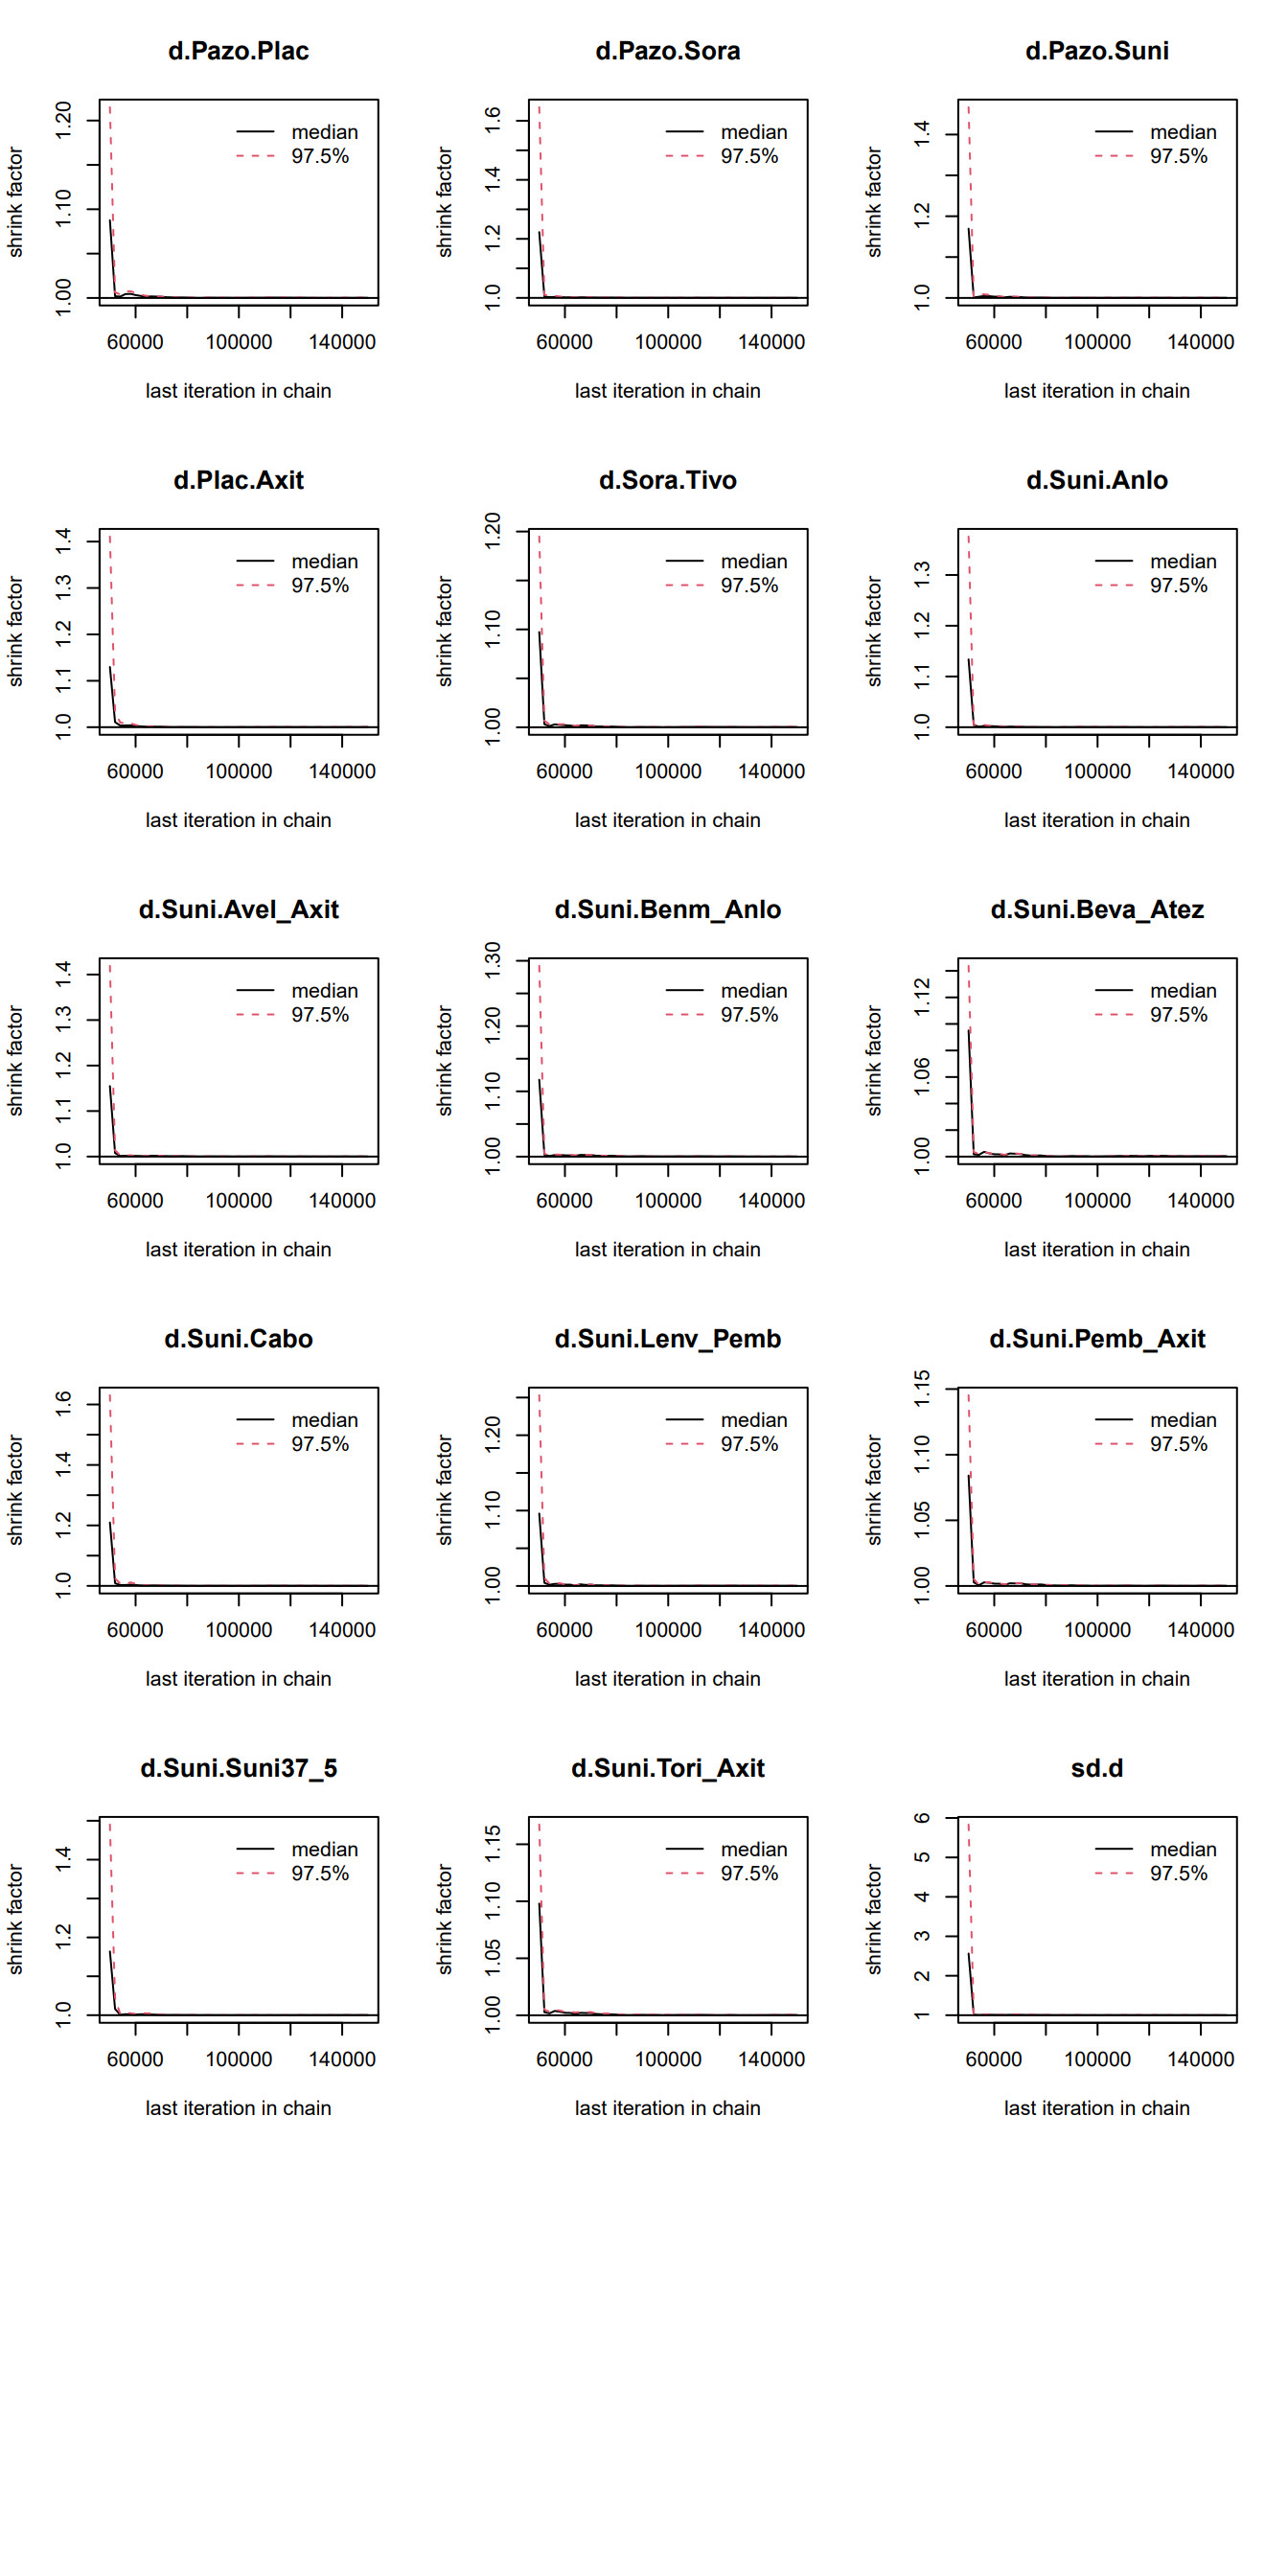


**Supplementary Figure S7** Grade ≥3 AEs convergence diagnostic diagram


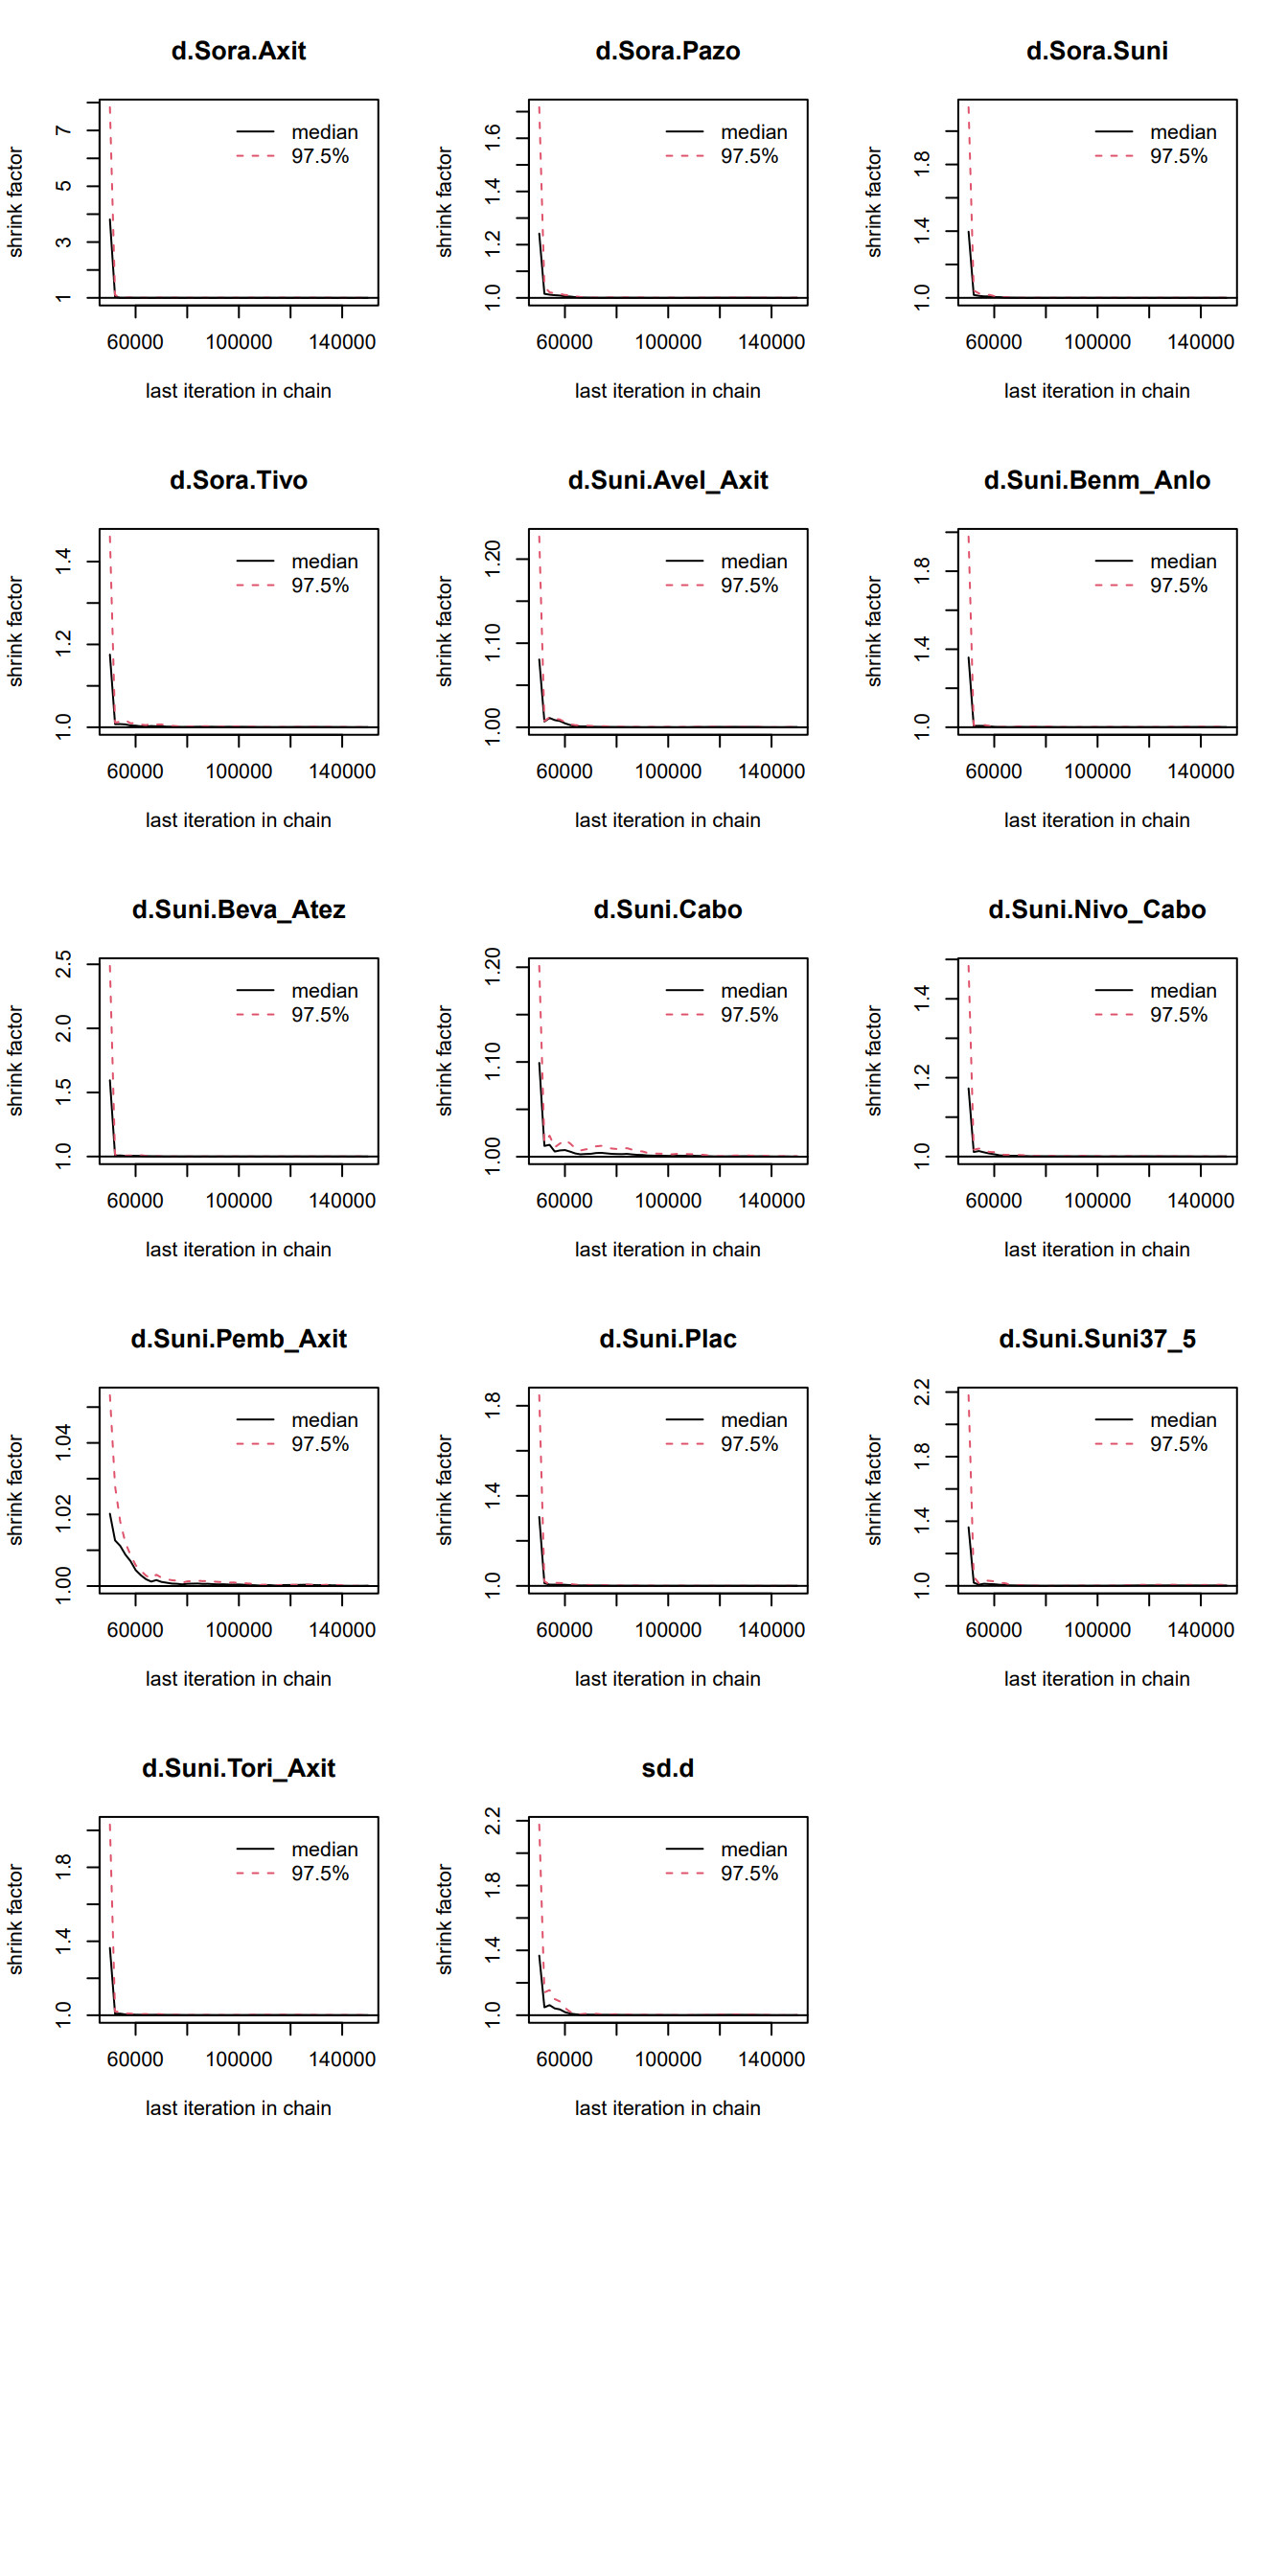

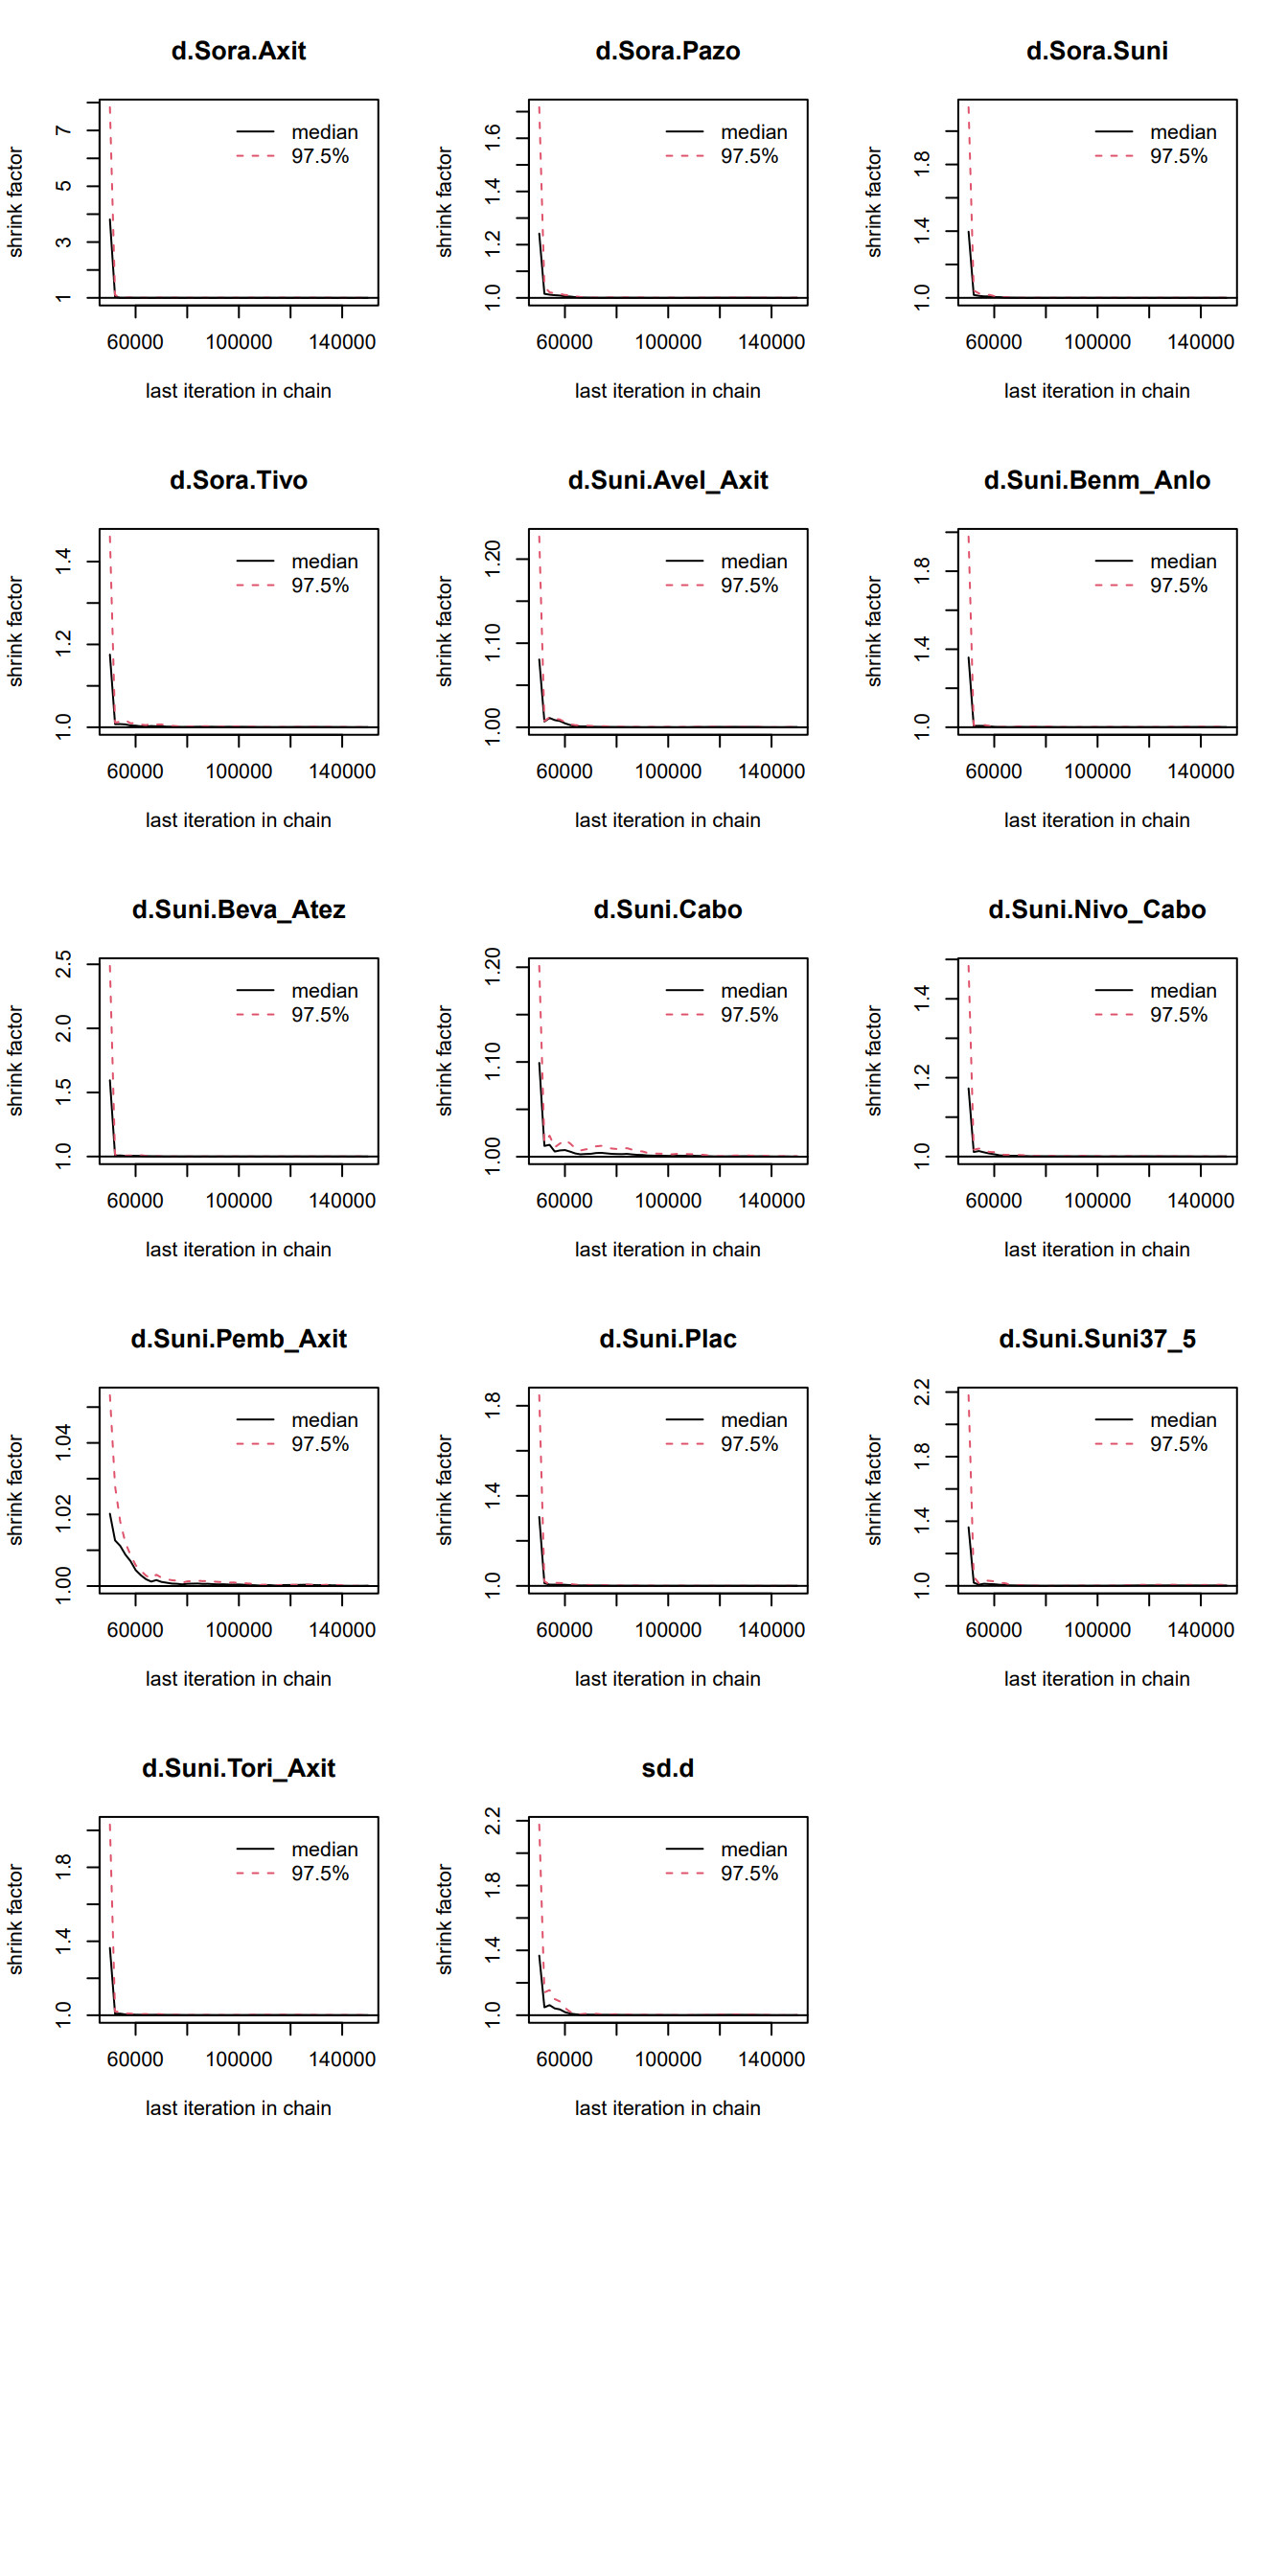


**Supplementary Figure S8** Discontinuations due to AEs convergence diagnostic diagram


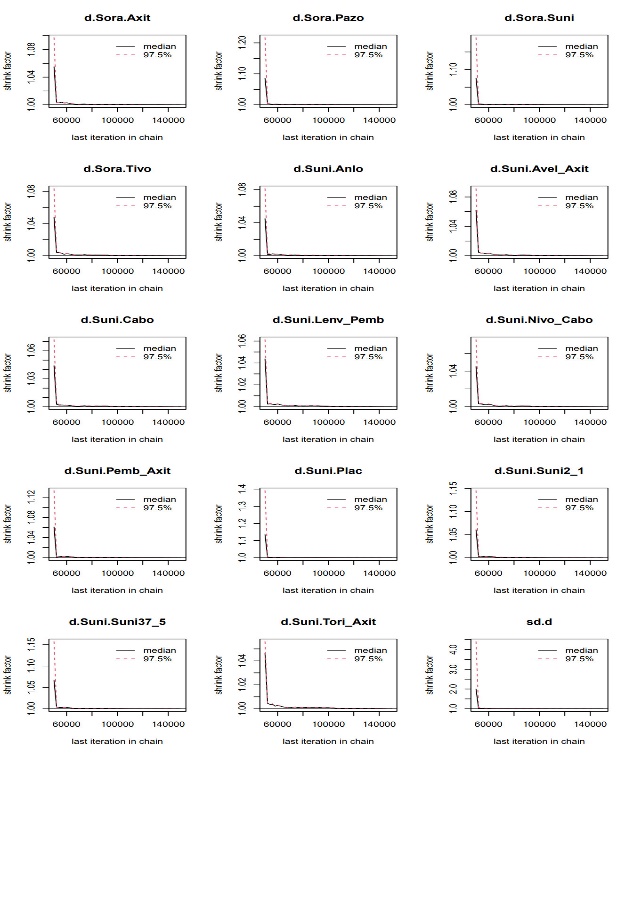

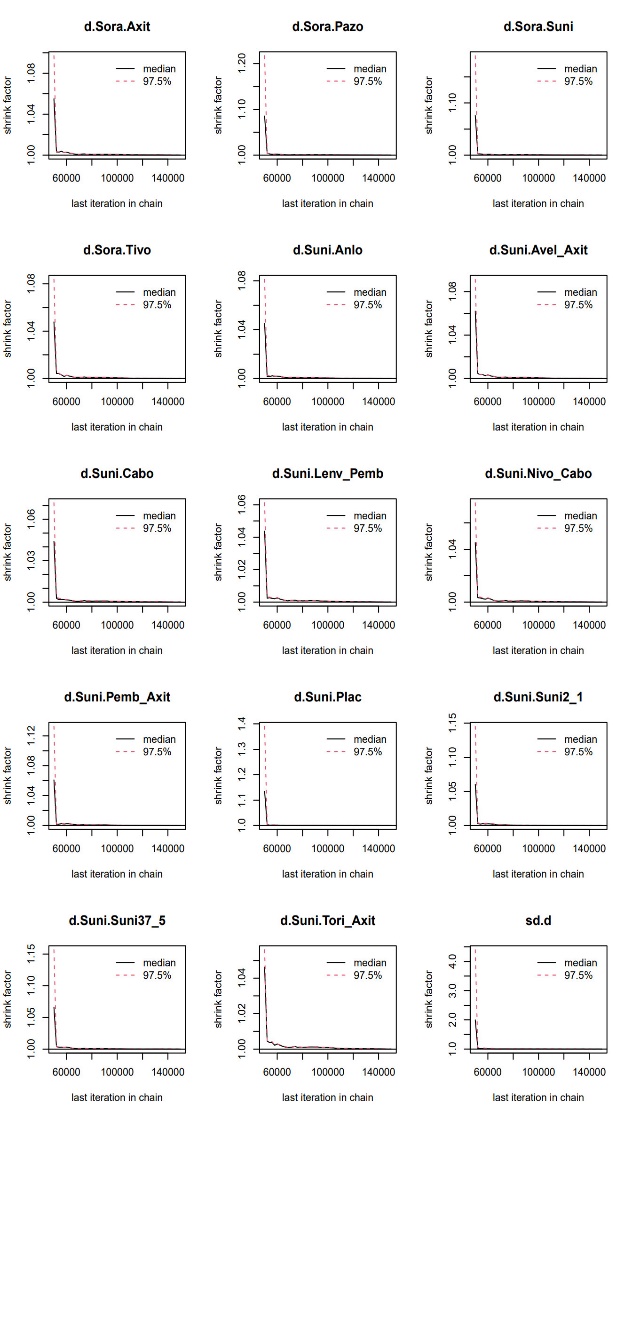


**Supplementary Figure S9** Hypertension convergence diagnostic diagram


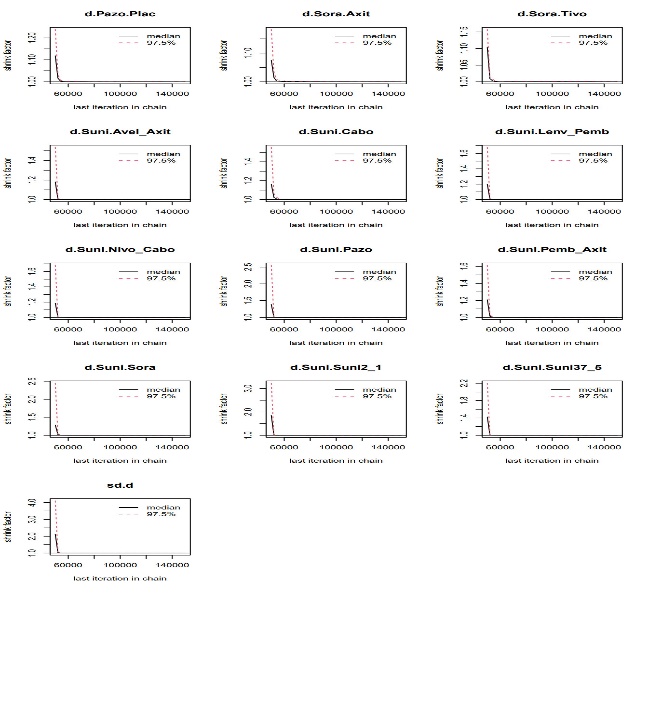

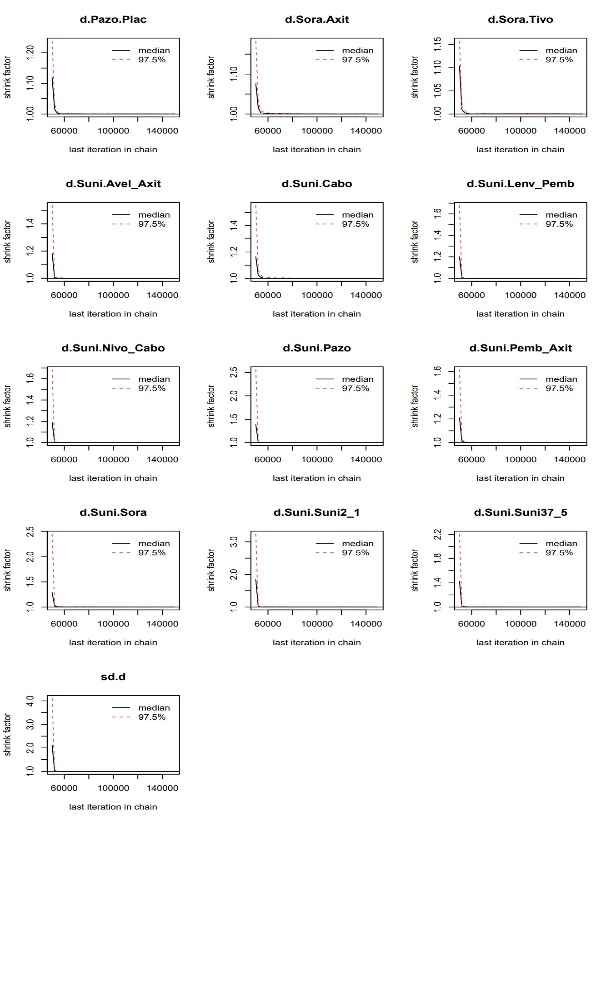


**Supplementary Figure S10** Fatigue convergence diagnostic diagram


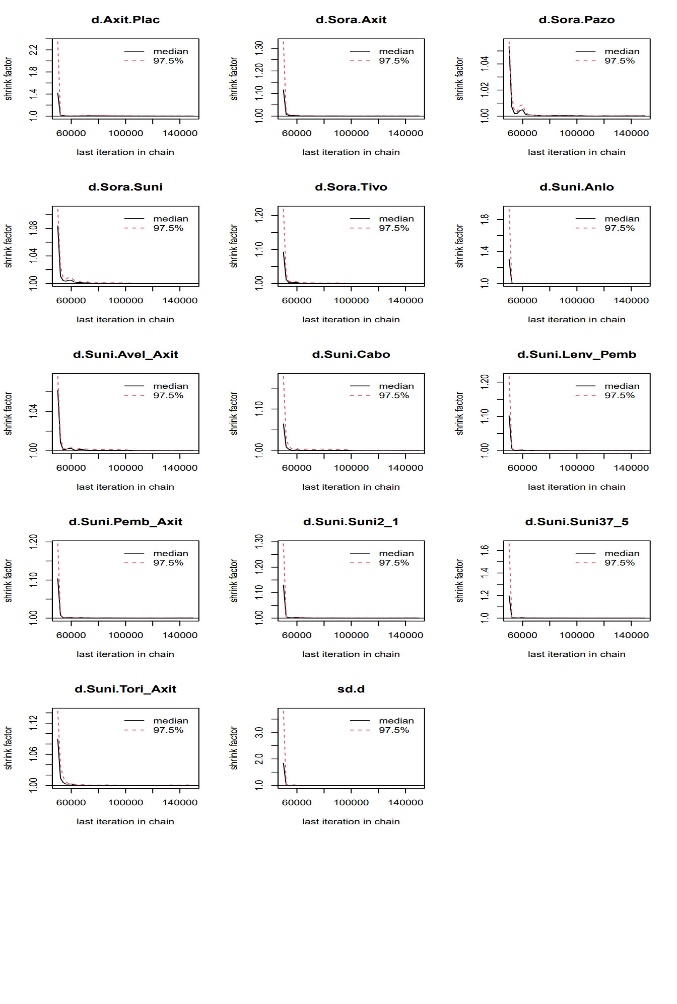

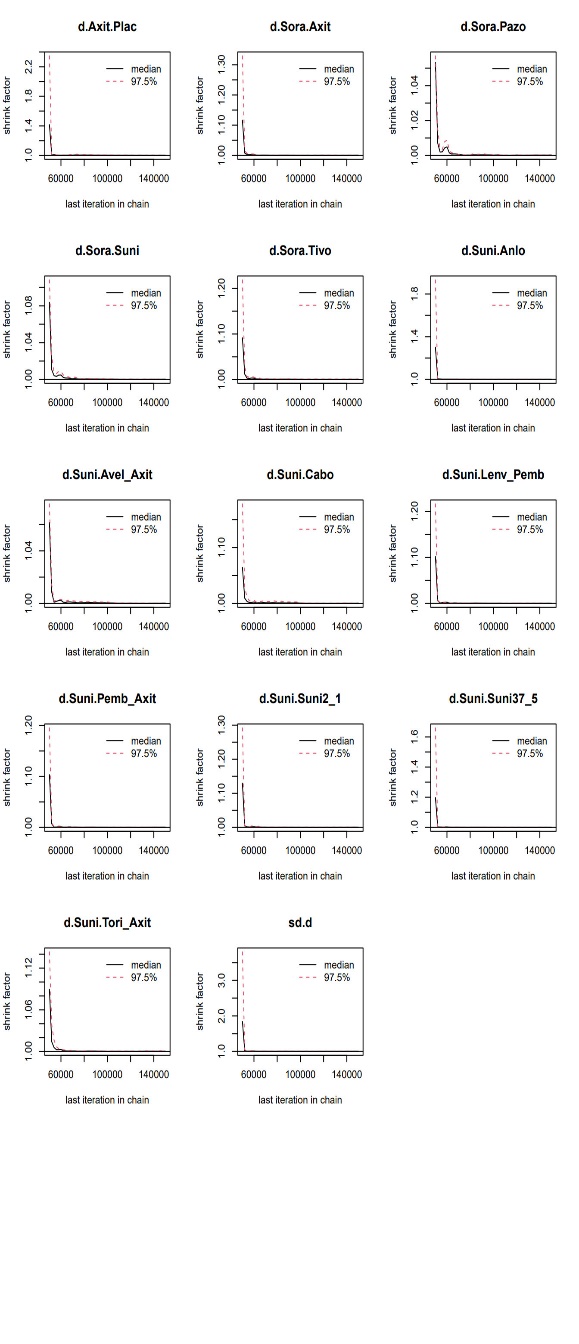


**Supplementary Figure S11** Hand-foot syndrome convergence diagnostic diagram

**A**


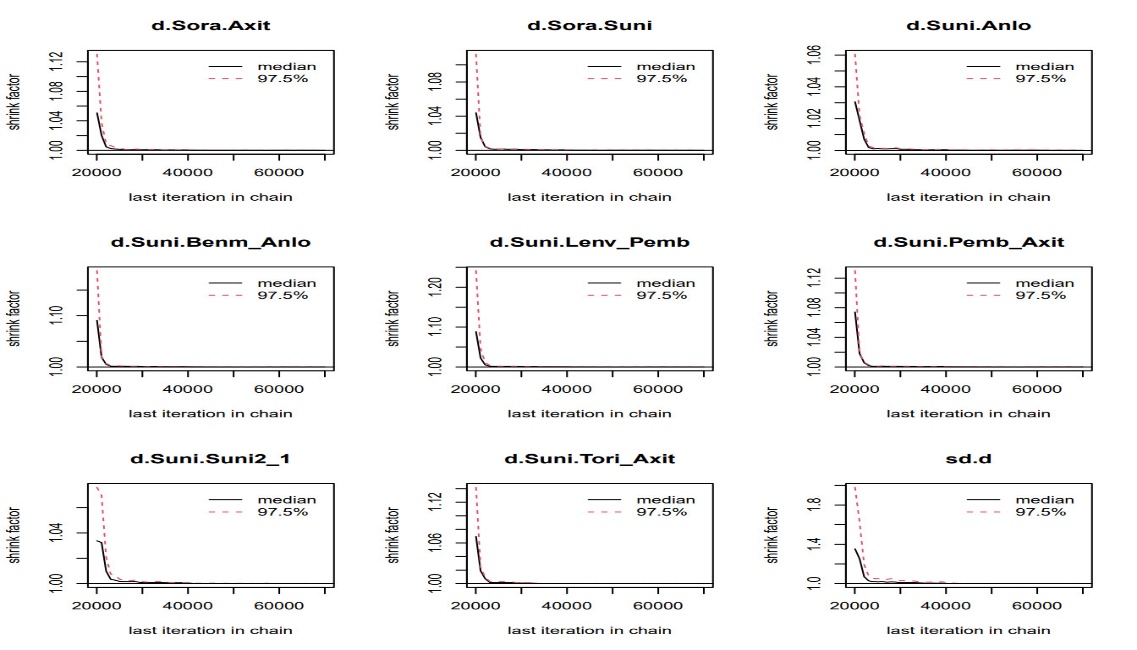


**B**


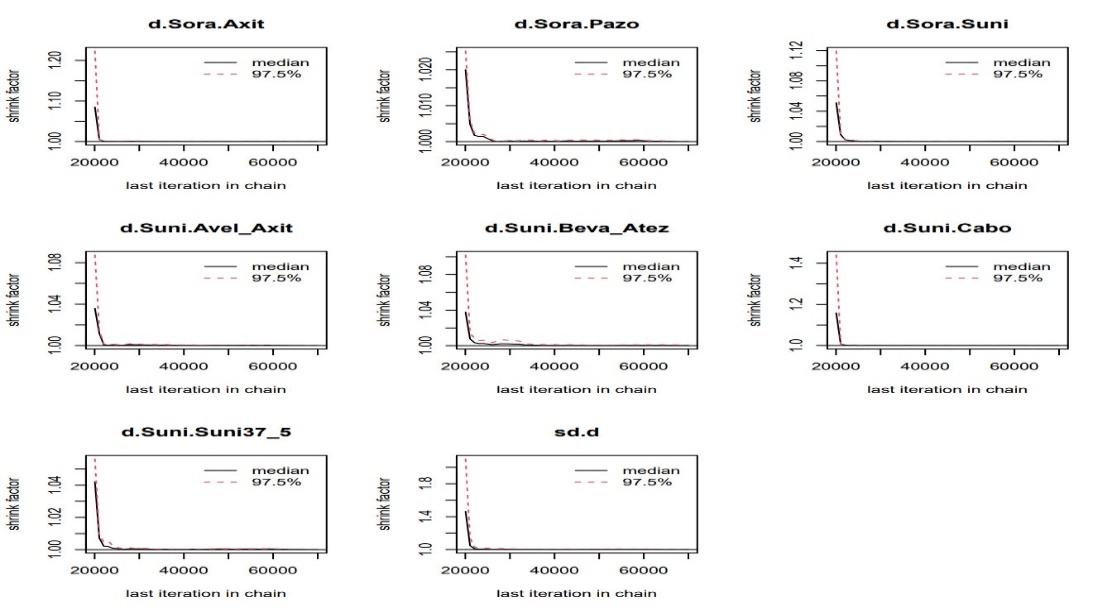


**Supplementary Figure S12** (A) Diagnosis Chart for the Asian Subgroup; (B) Diagnosis Chart for the Non-Asian Subgroup

**A**


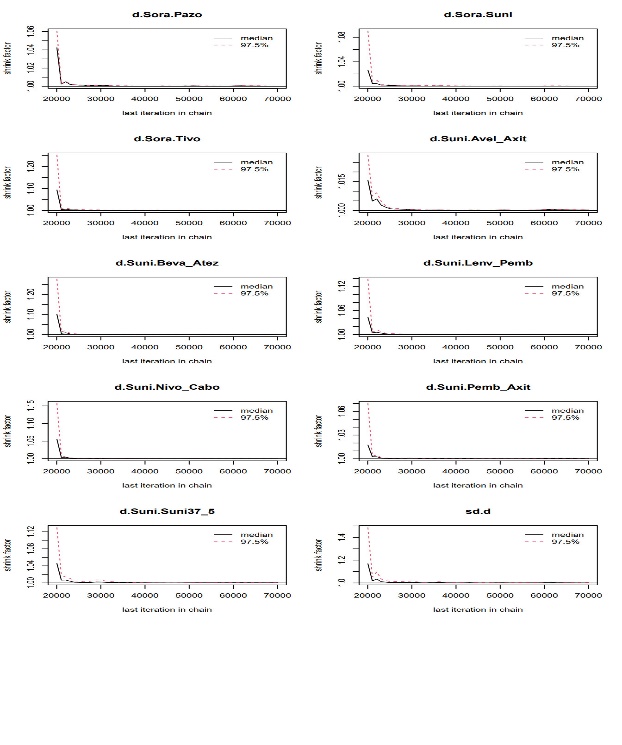

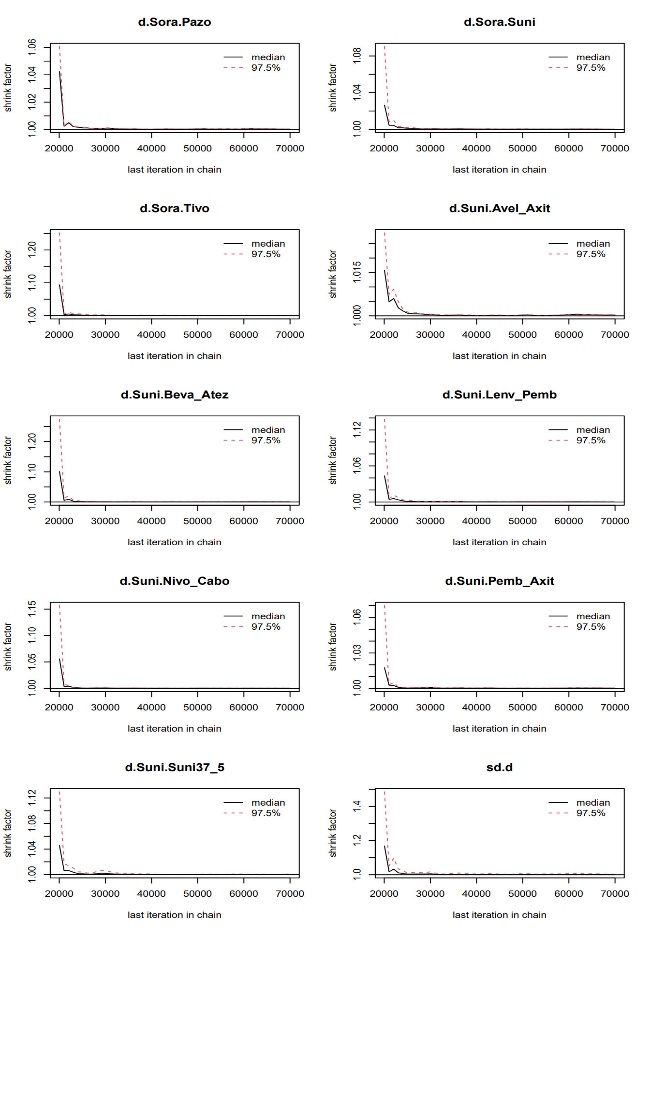
**B**


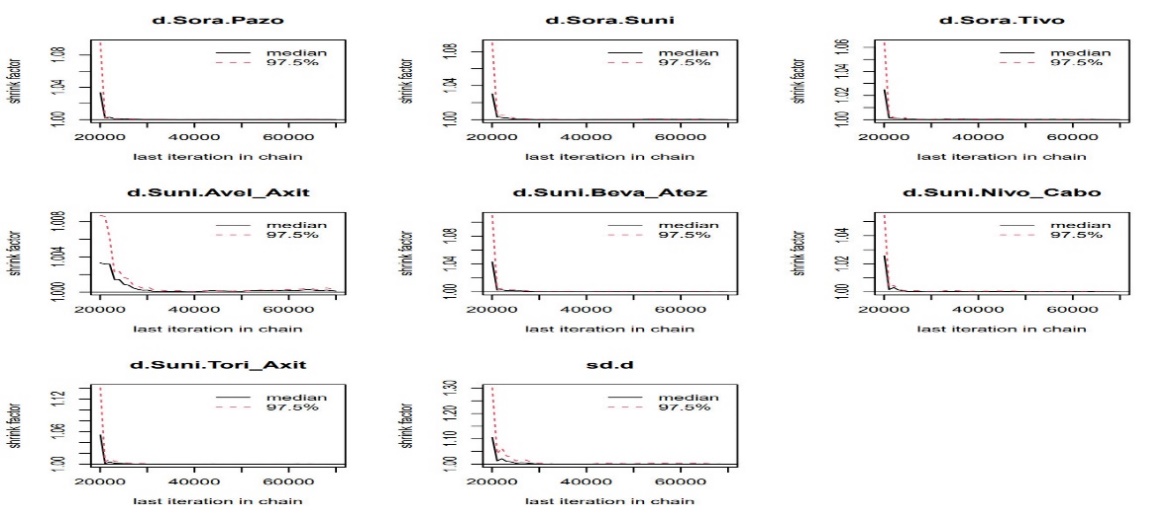


**C**


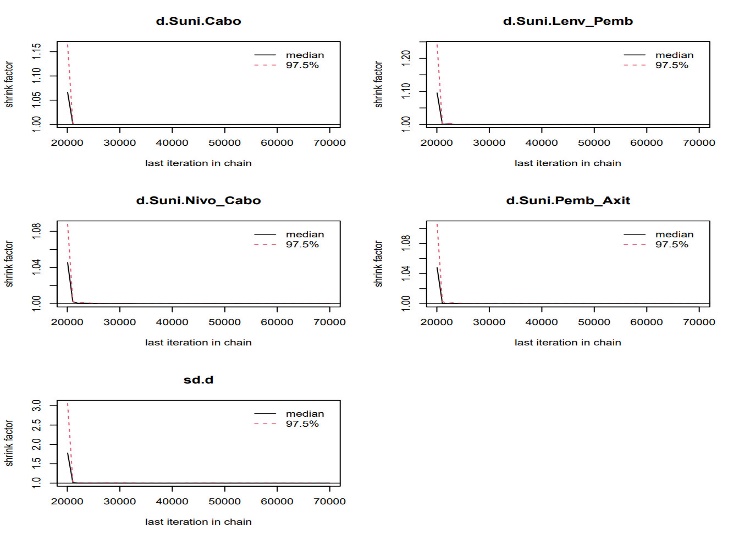

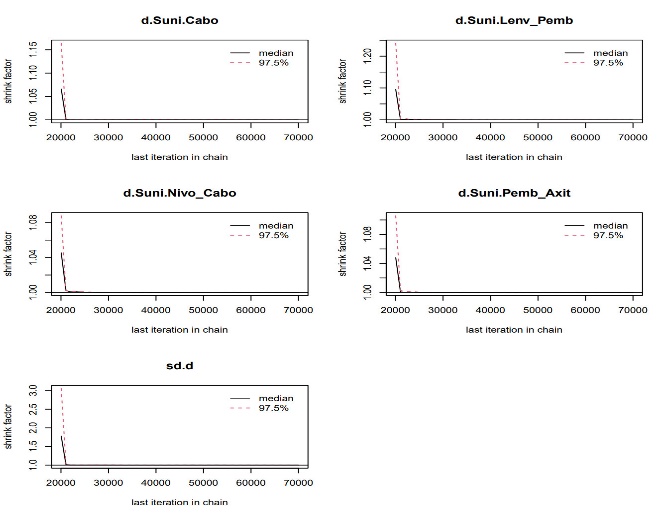


**D**


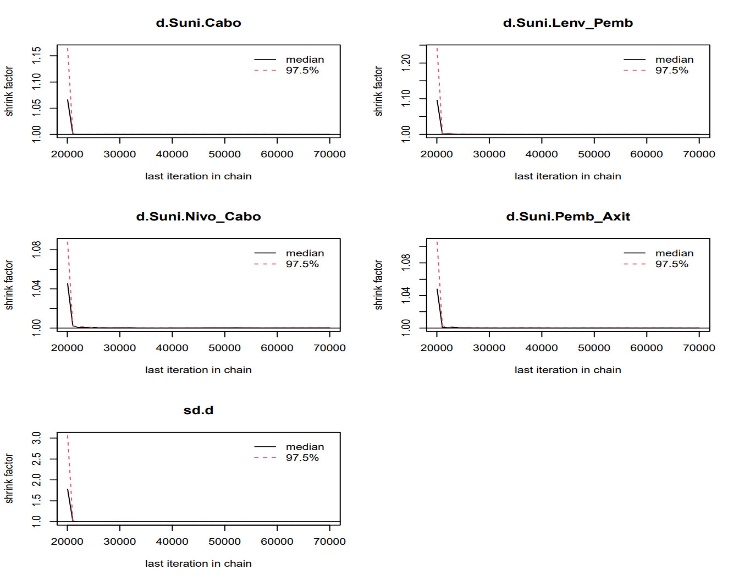

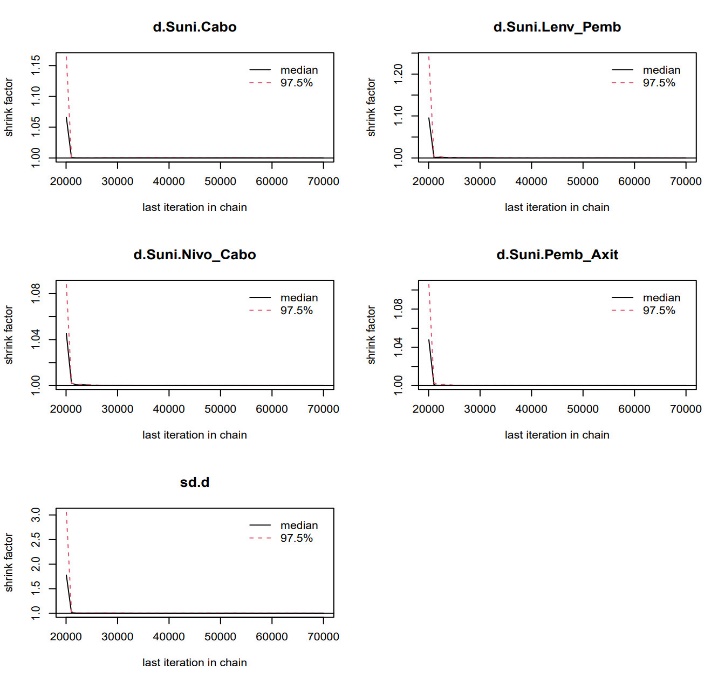


**Supplementary Figure S13** (A) Low-risk subgroup diagnosis chart; (B) Intermediate-risk subgroup diagnosis chart; (C) Intermediate-high-risk subgroup diagnosis chart; (D) High-risk subgroup diagnosis chart.


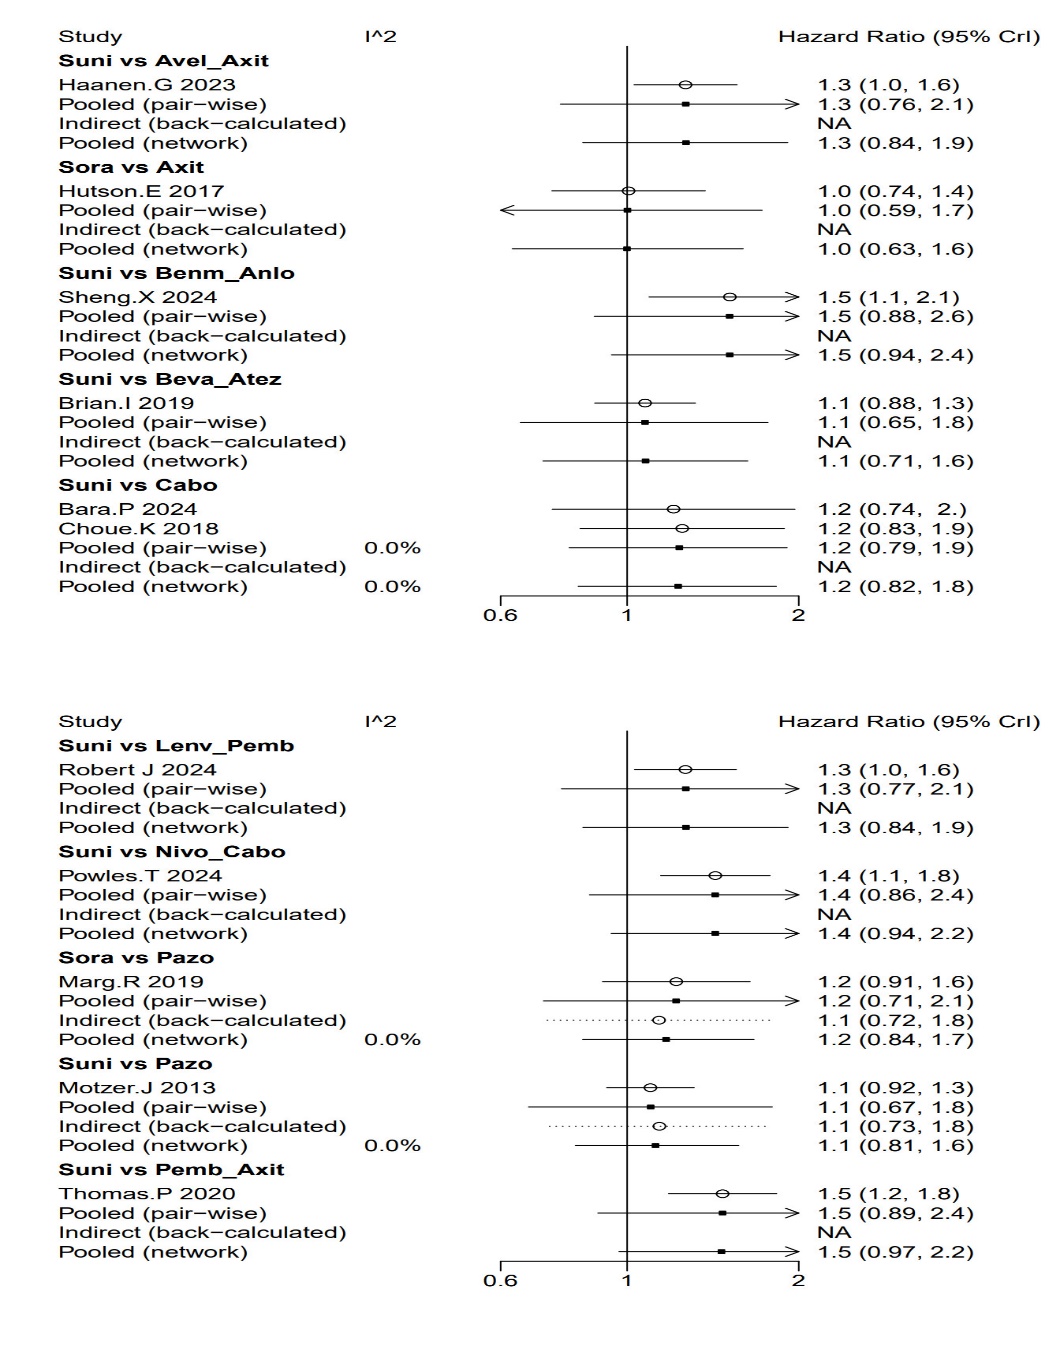


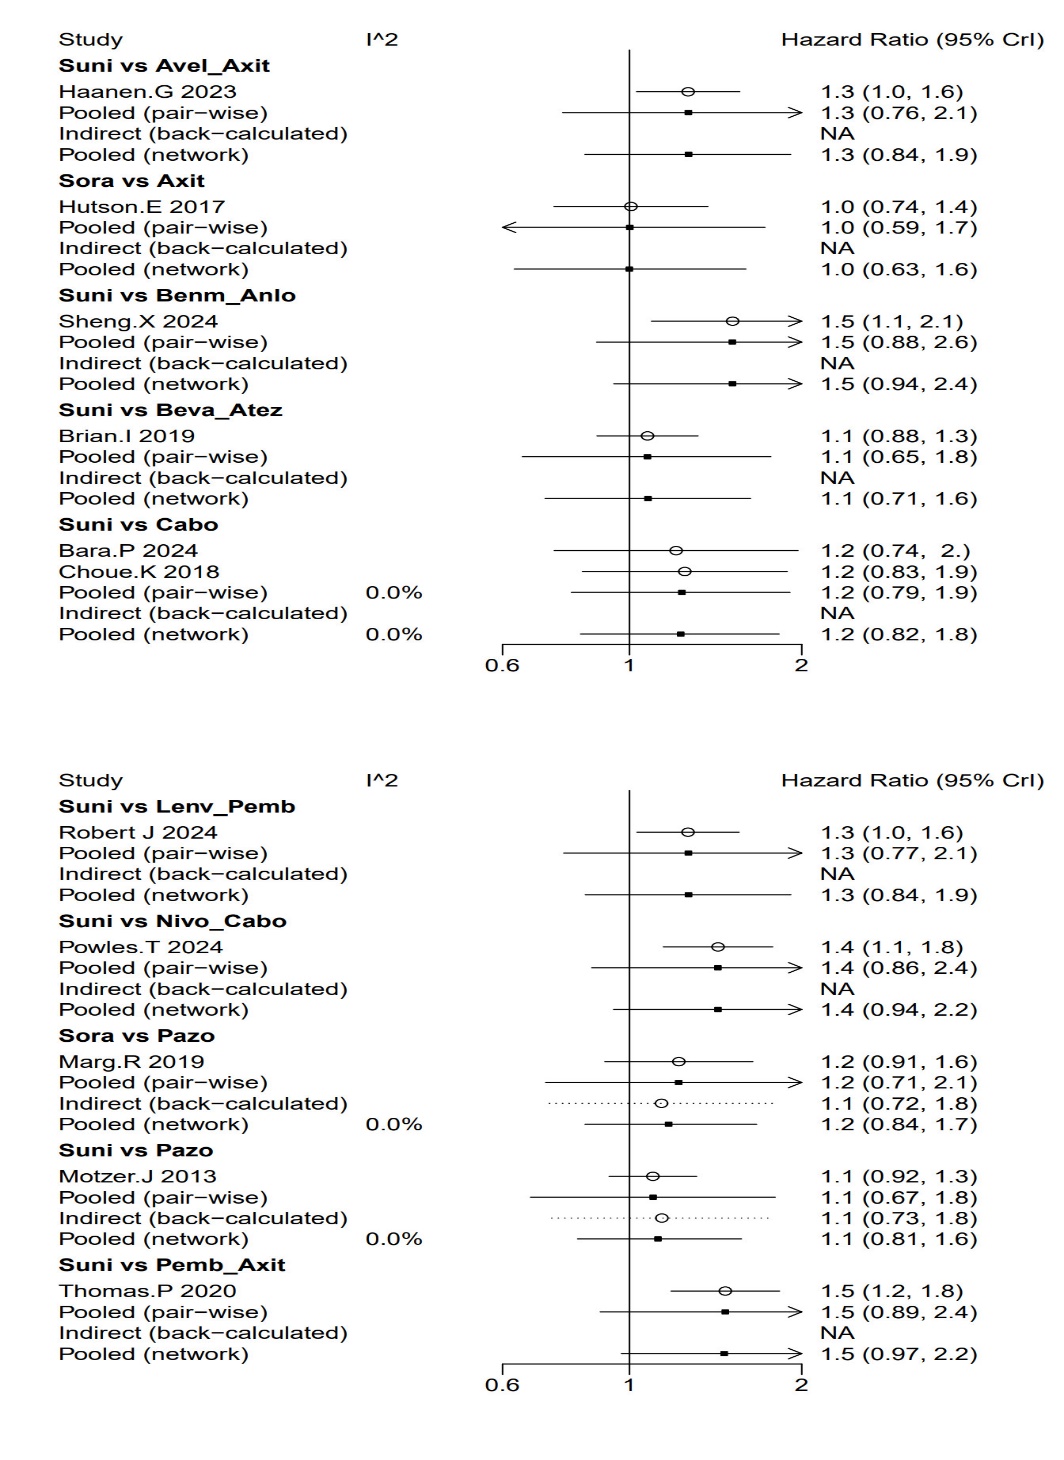


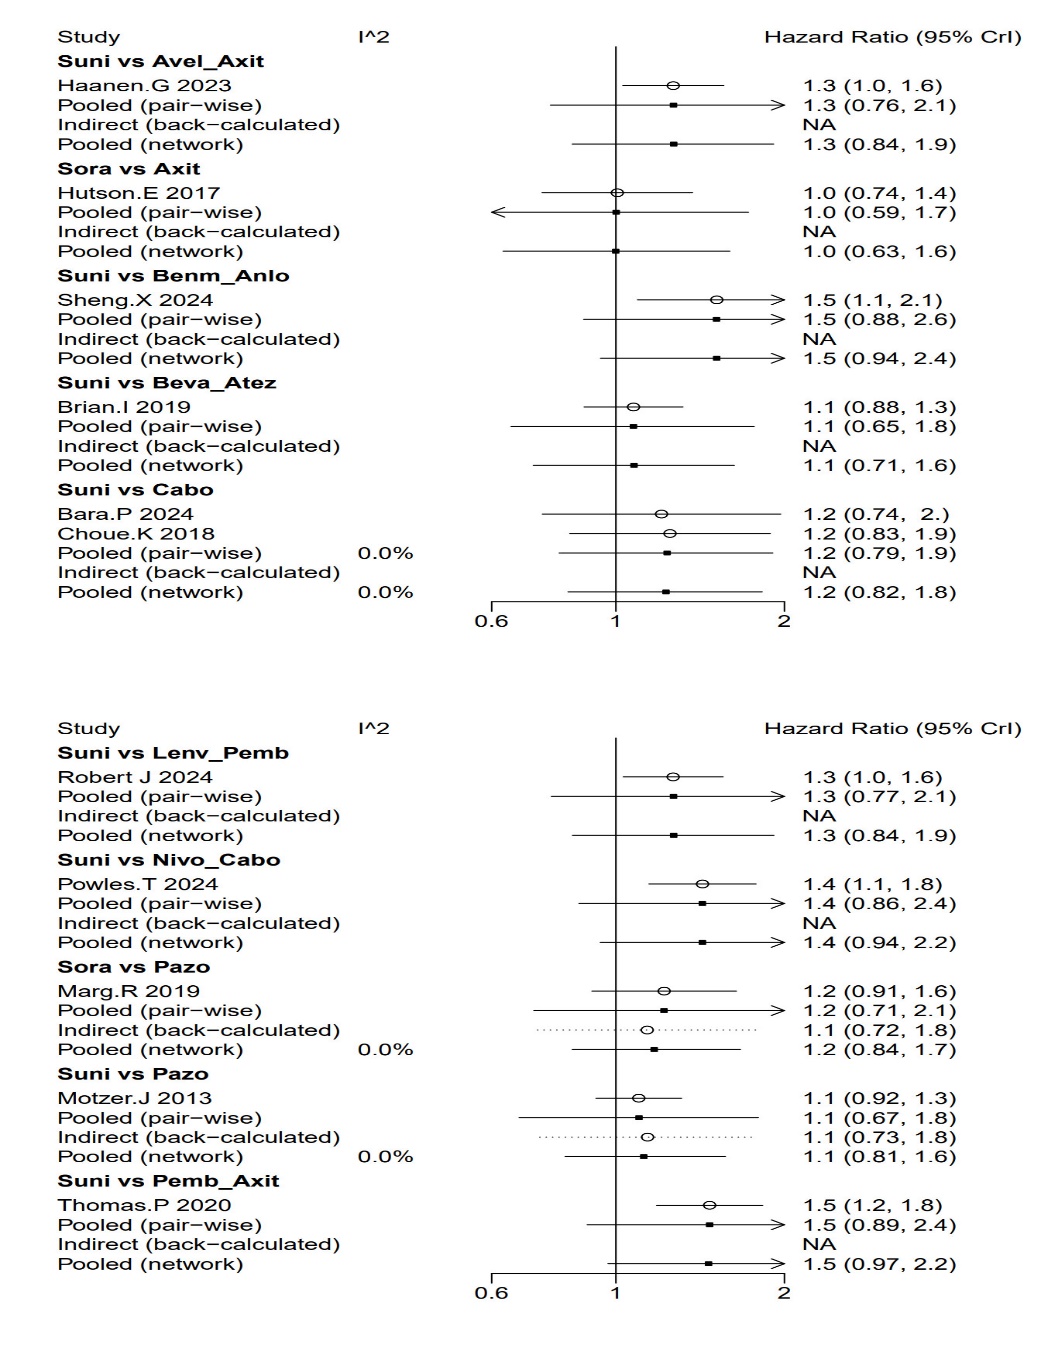


**Supplementary Figure S14** Forest plot of OS heterogeneity


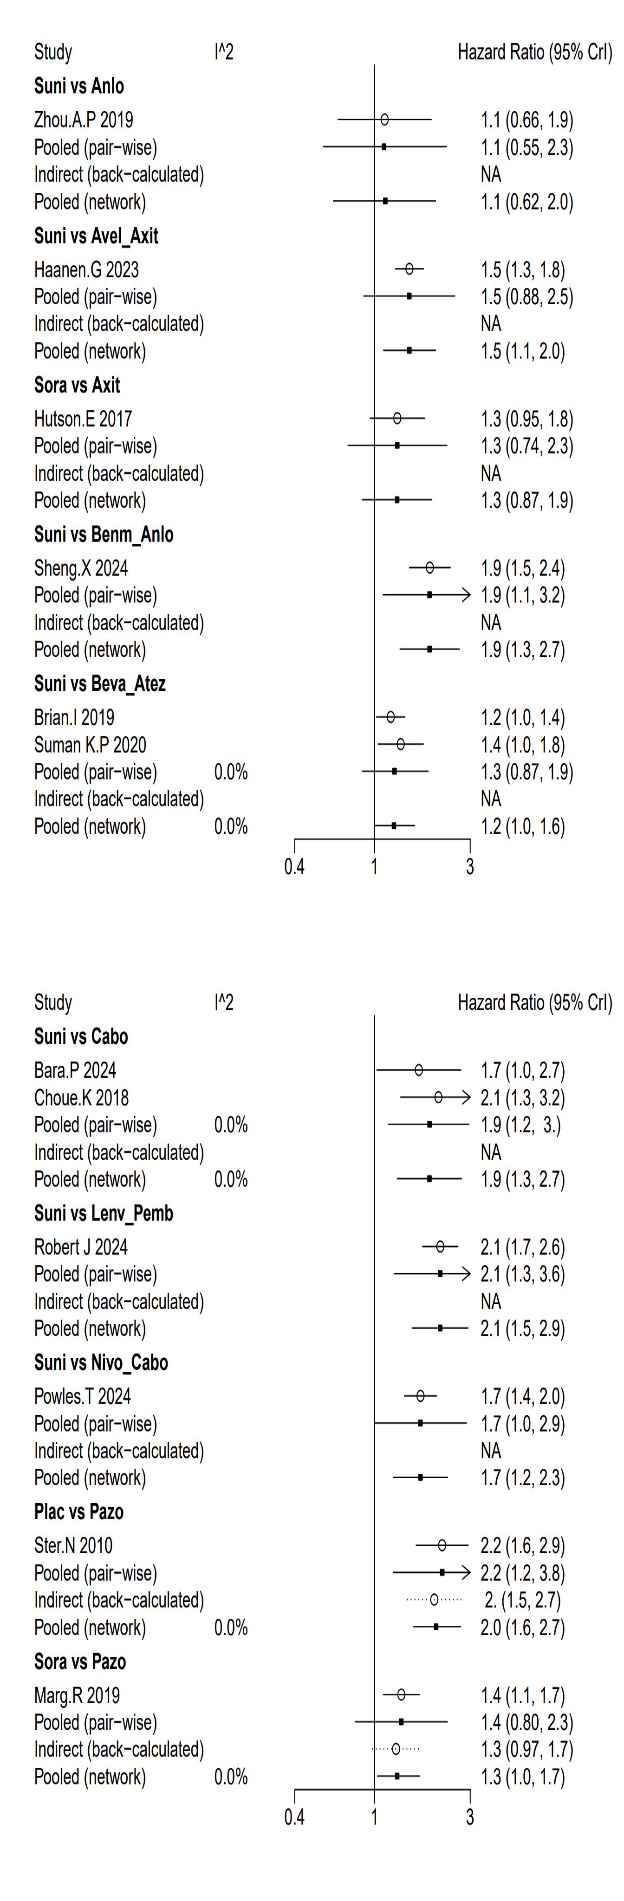

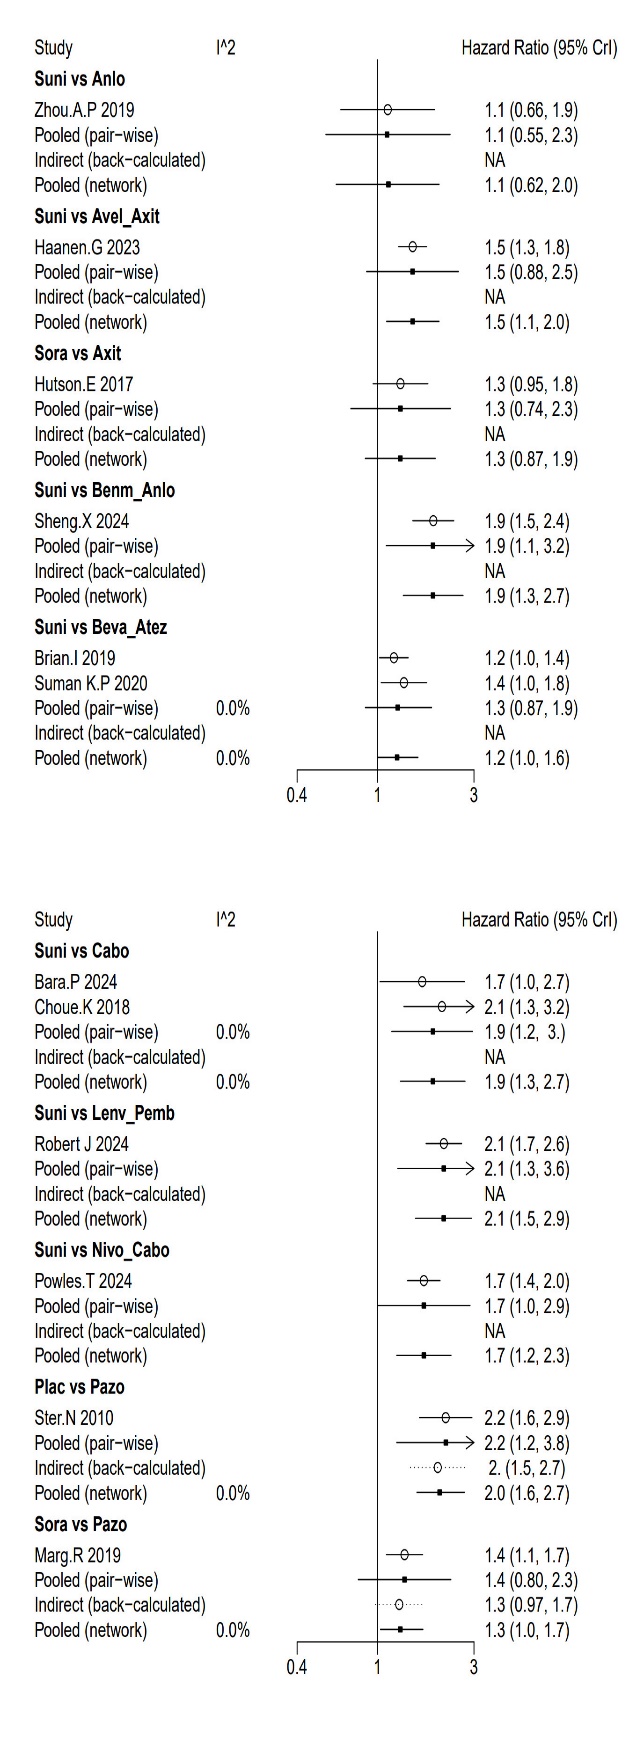


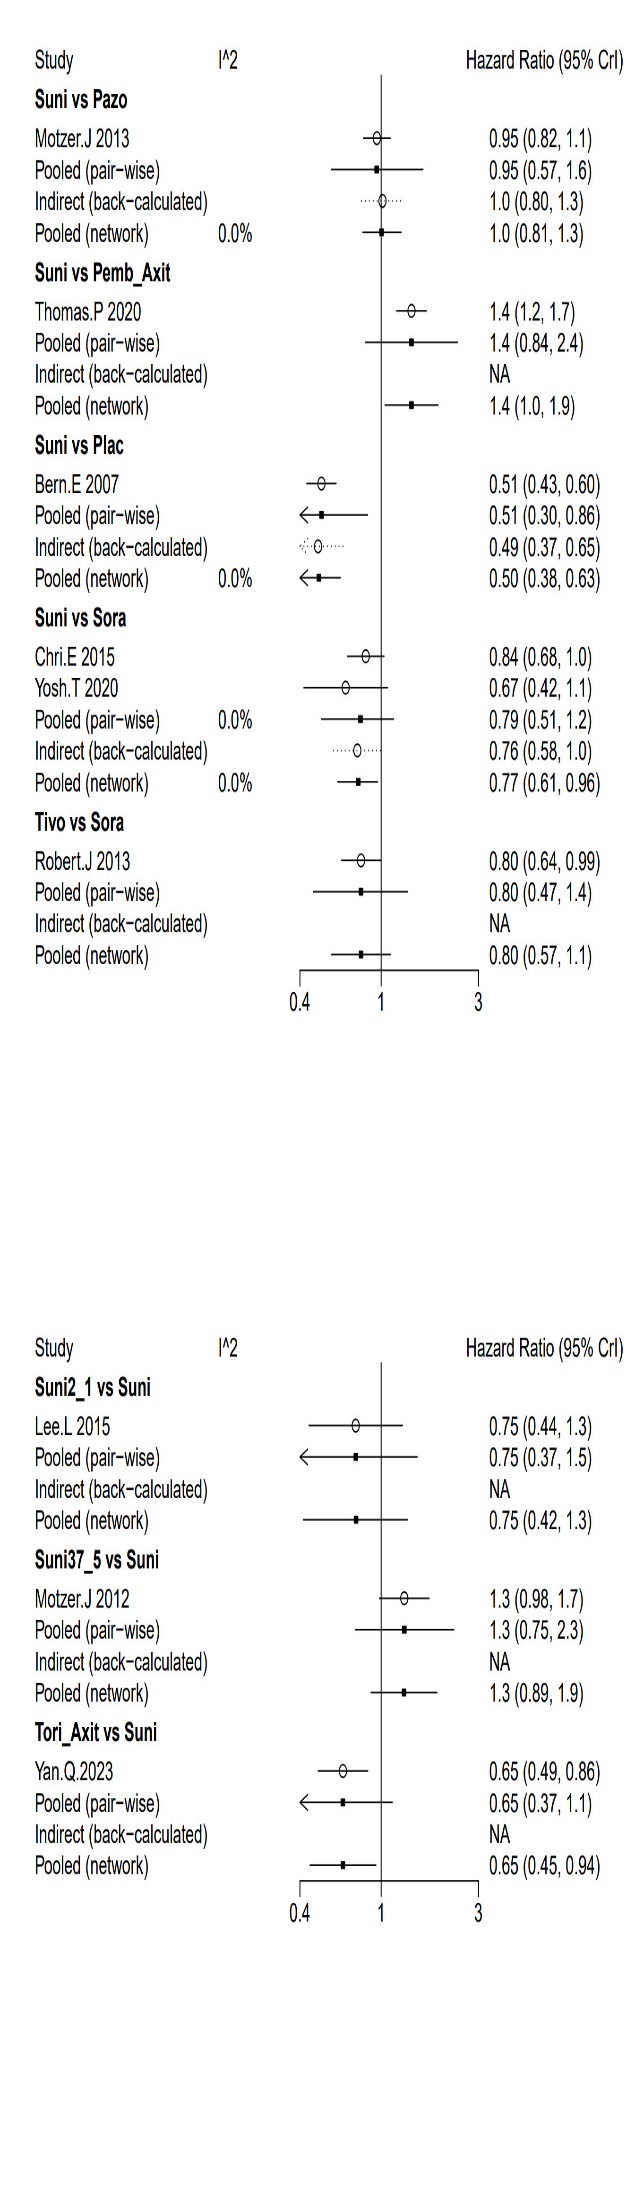

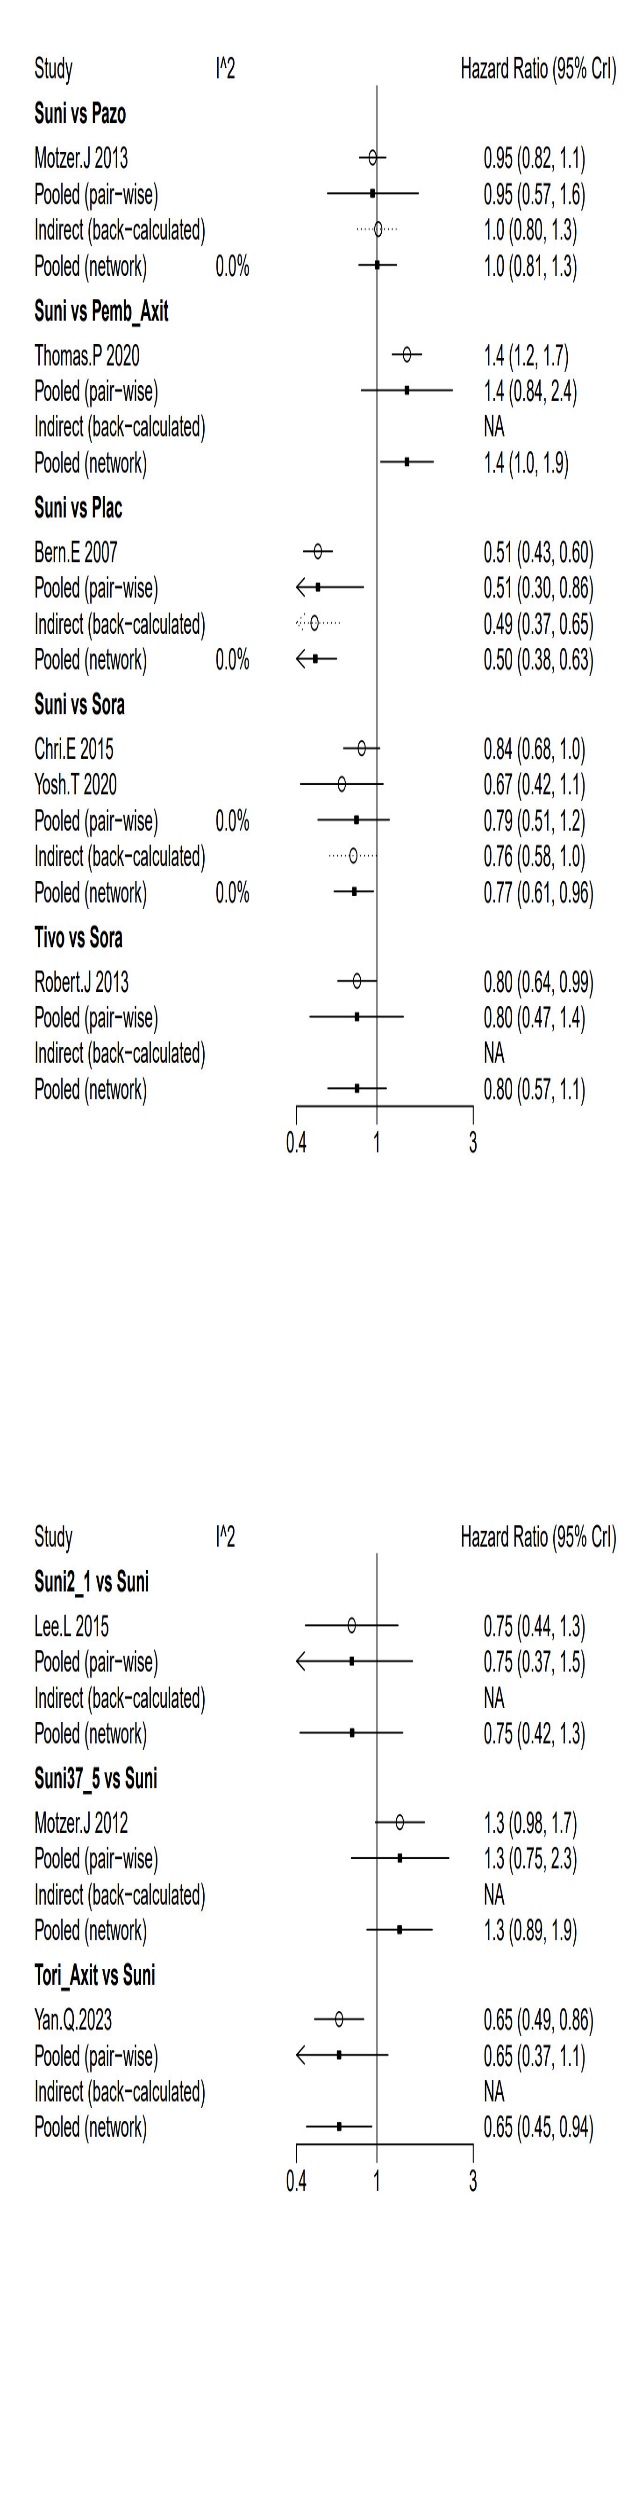


**Supplementary Figure S15** Forest plot of PFS heterogeneity


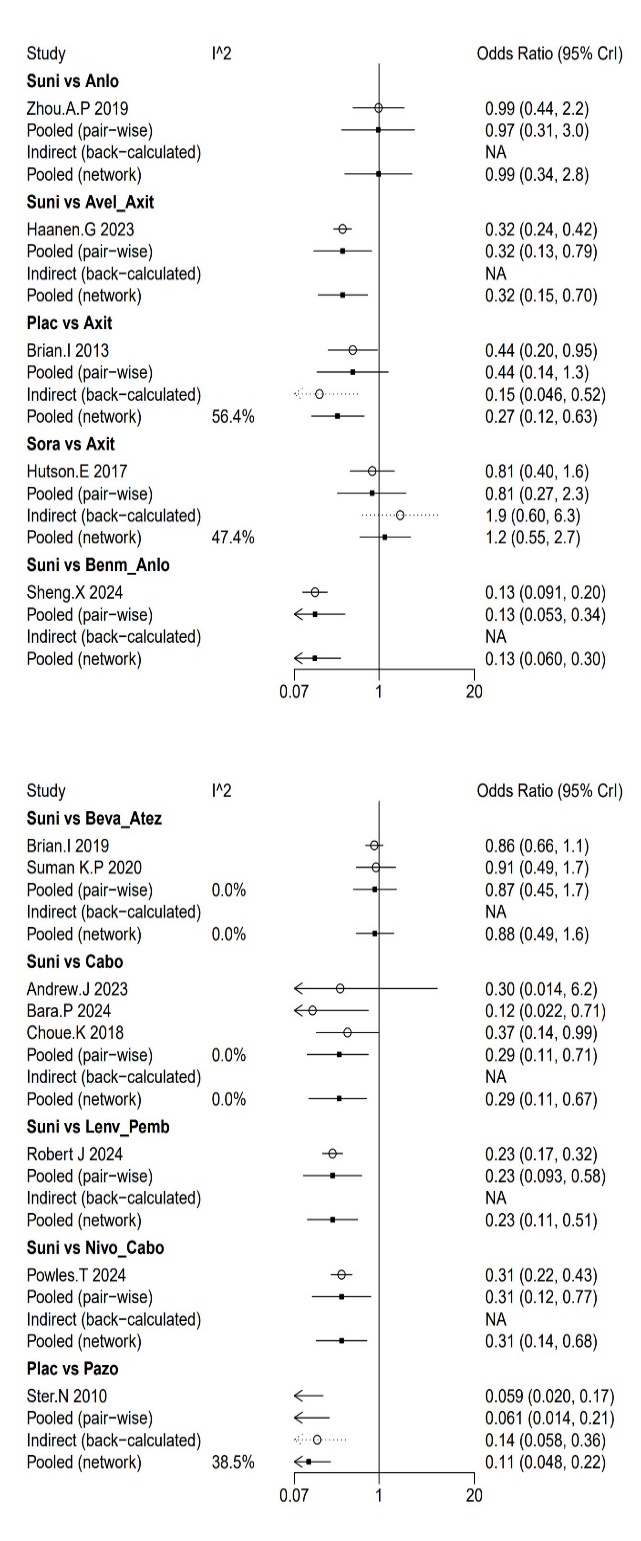

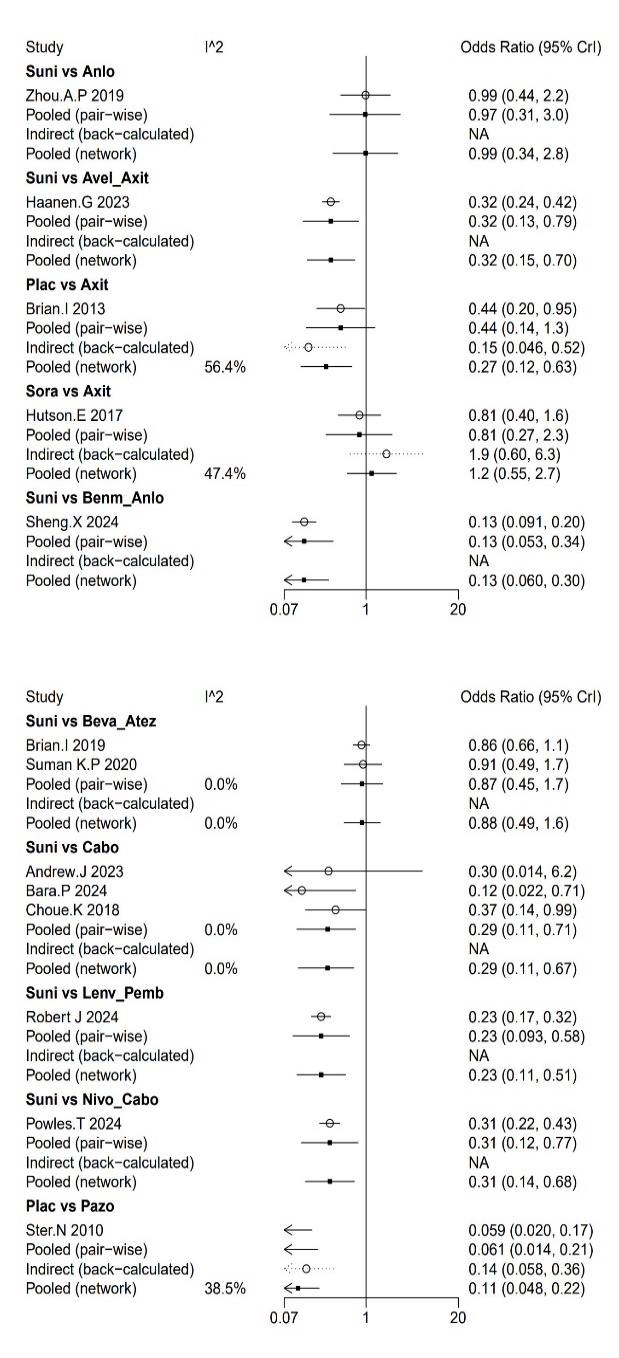


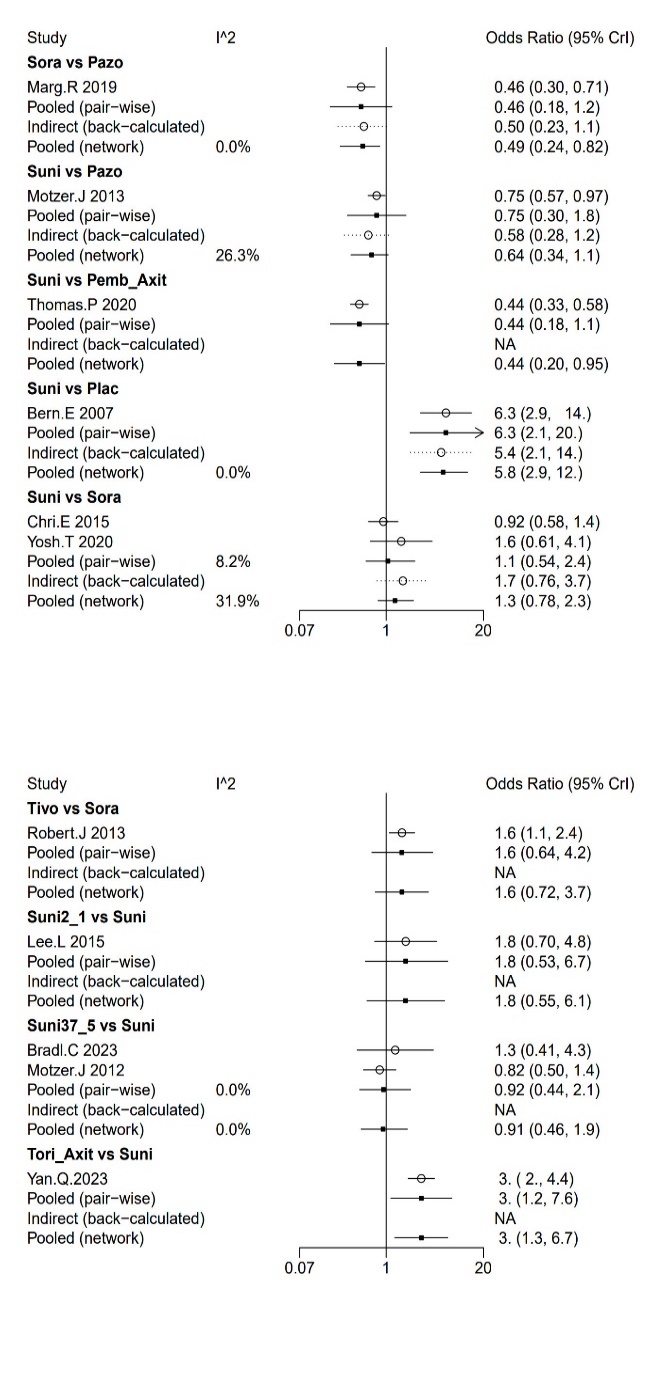

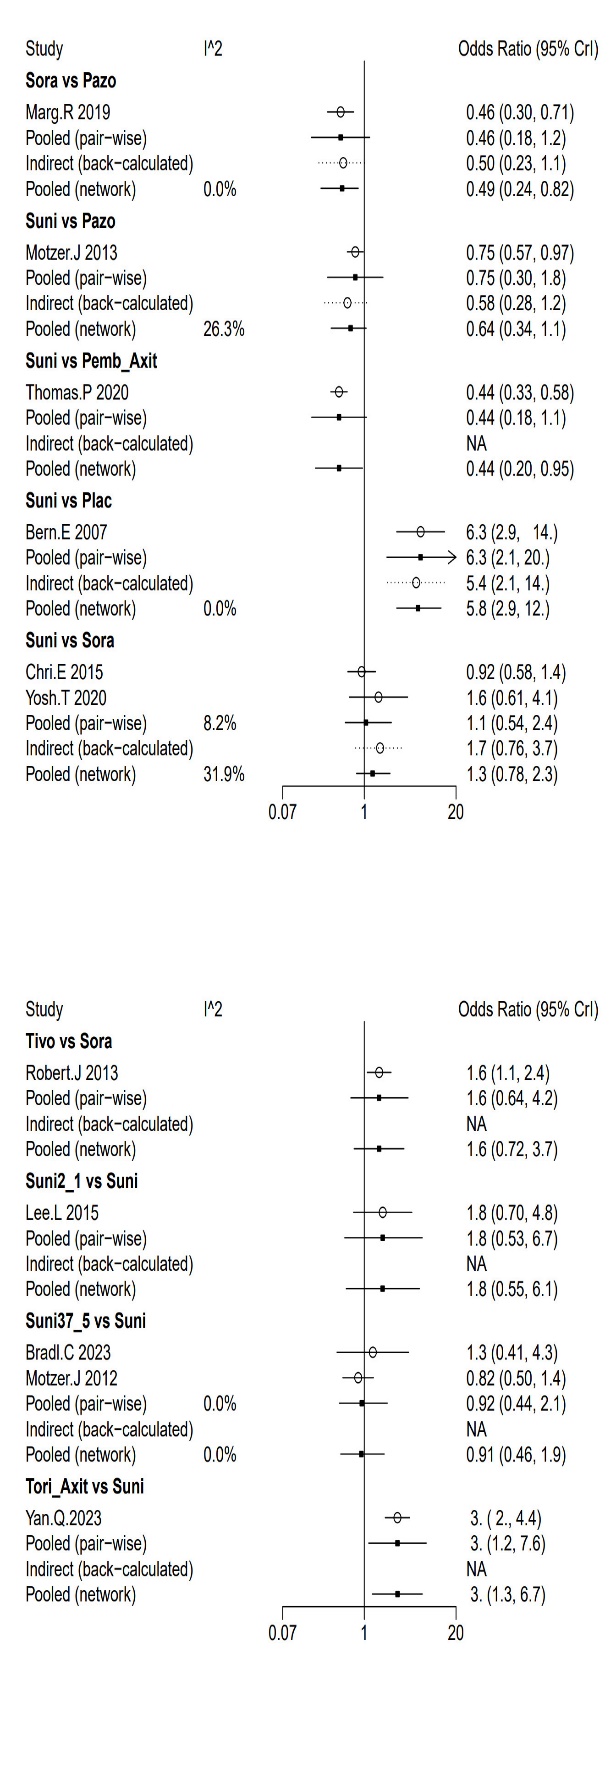


**Supplementary Figure S16** Forest plot of ORR heterogeneity


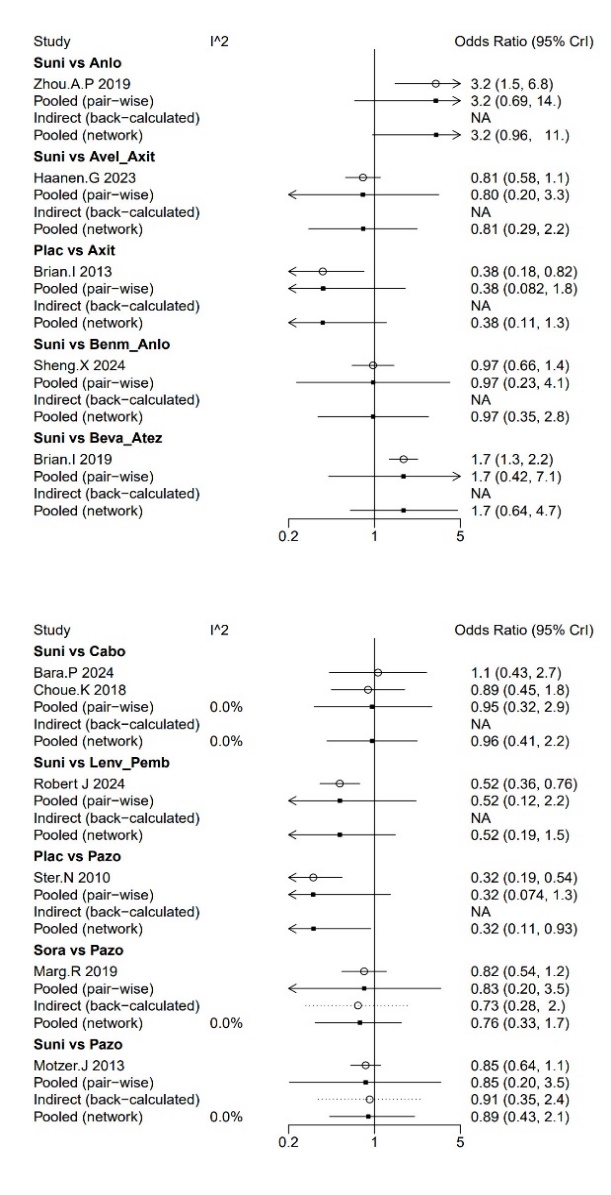

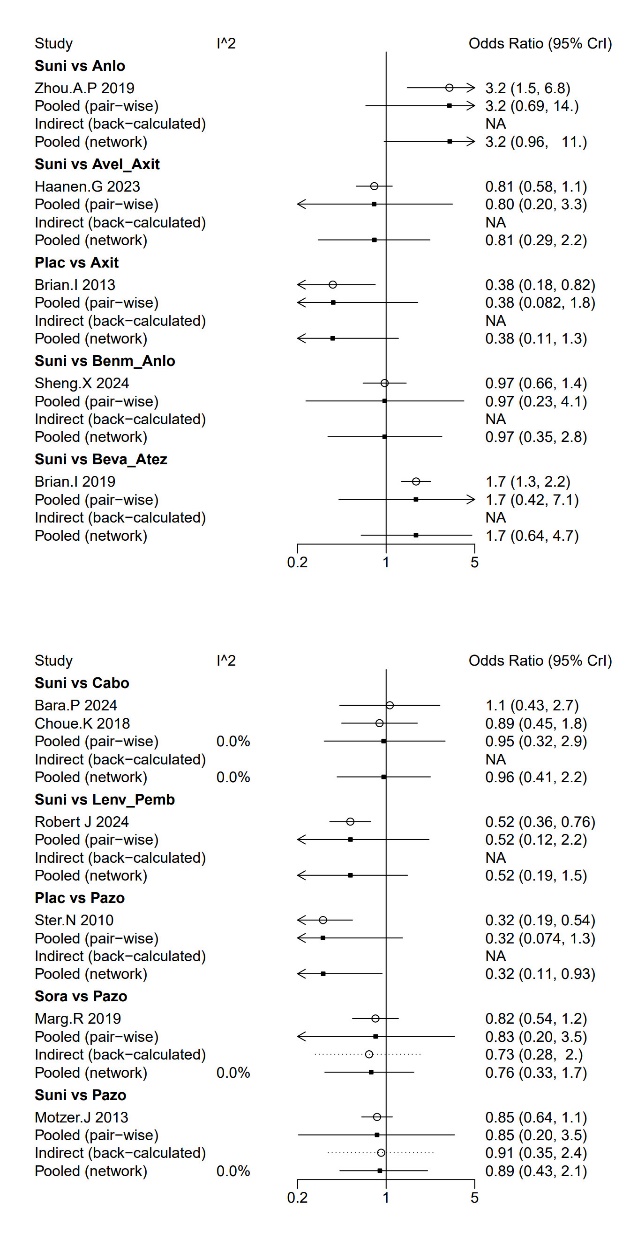


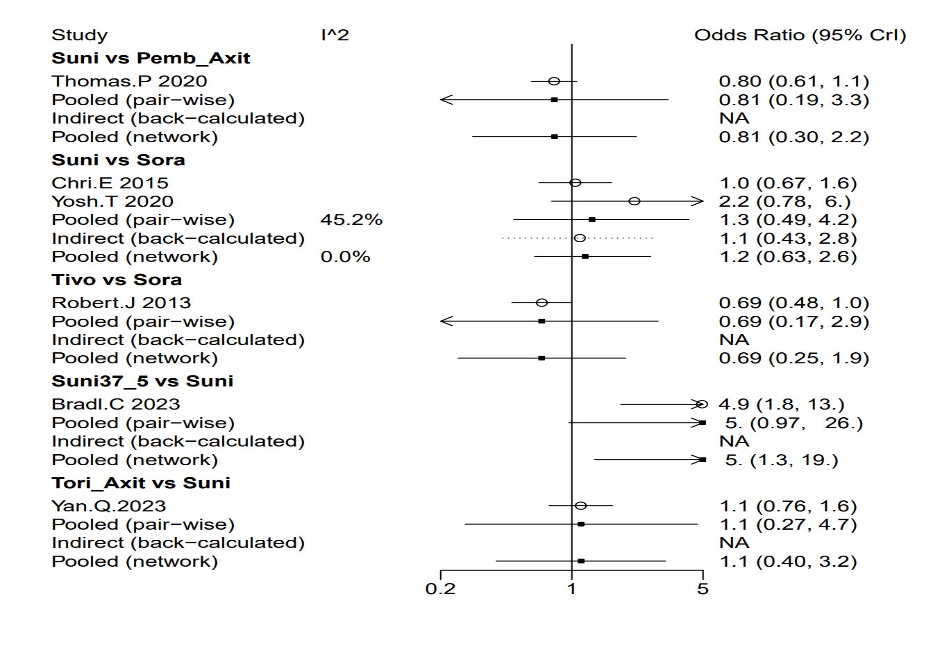


**Supplementary Figure S17** Forest plot of ≥3 AEs heterogeneity


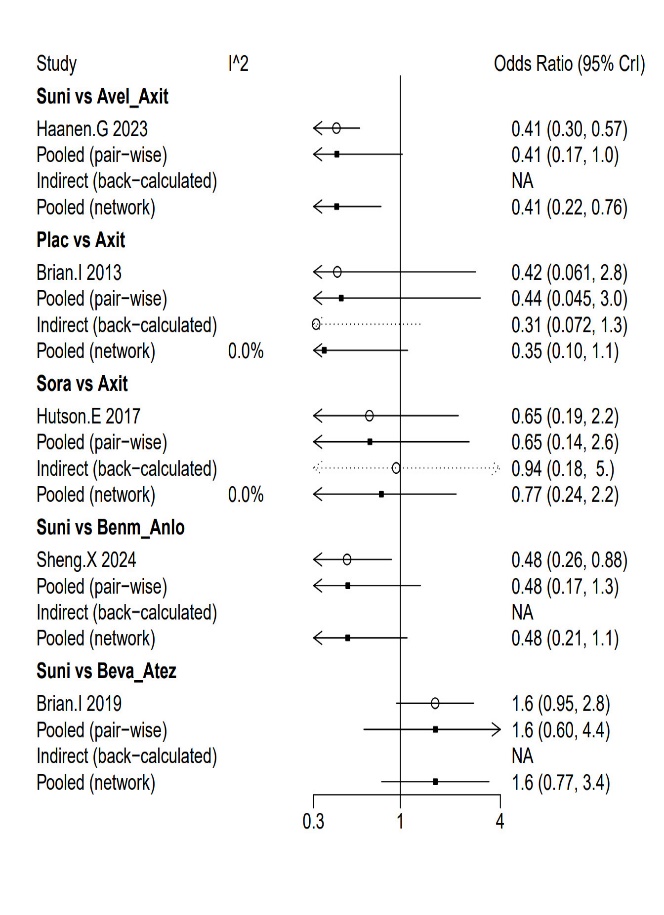

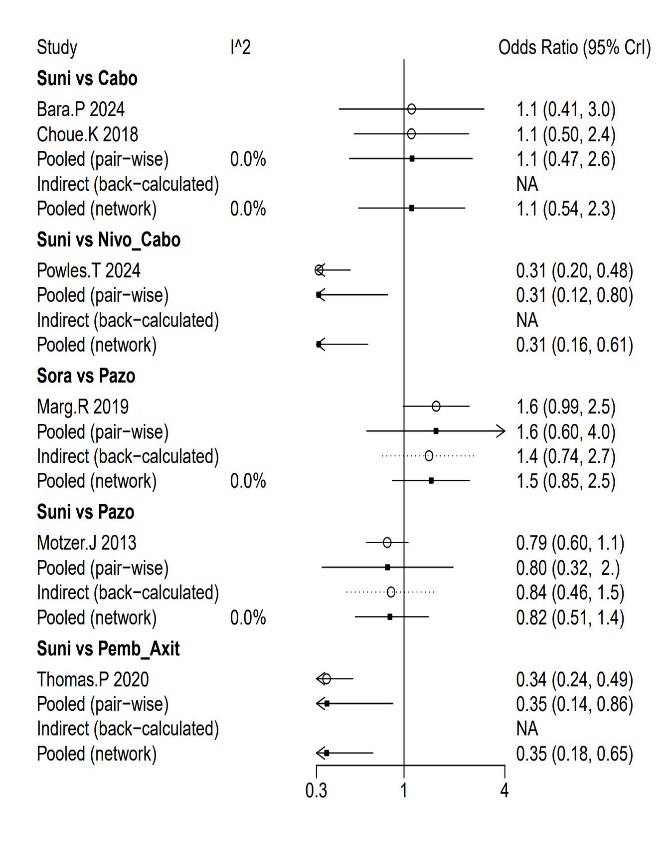


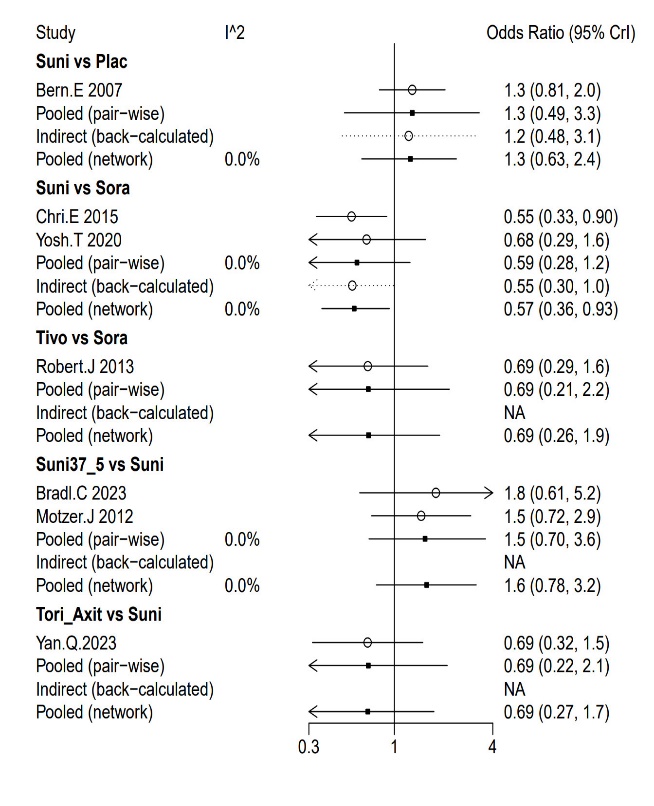

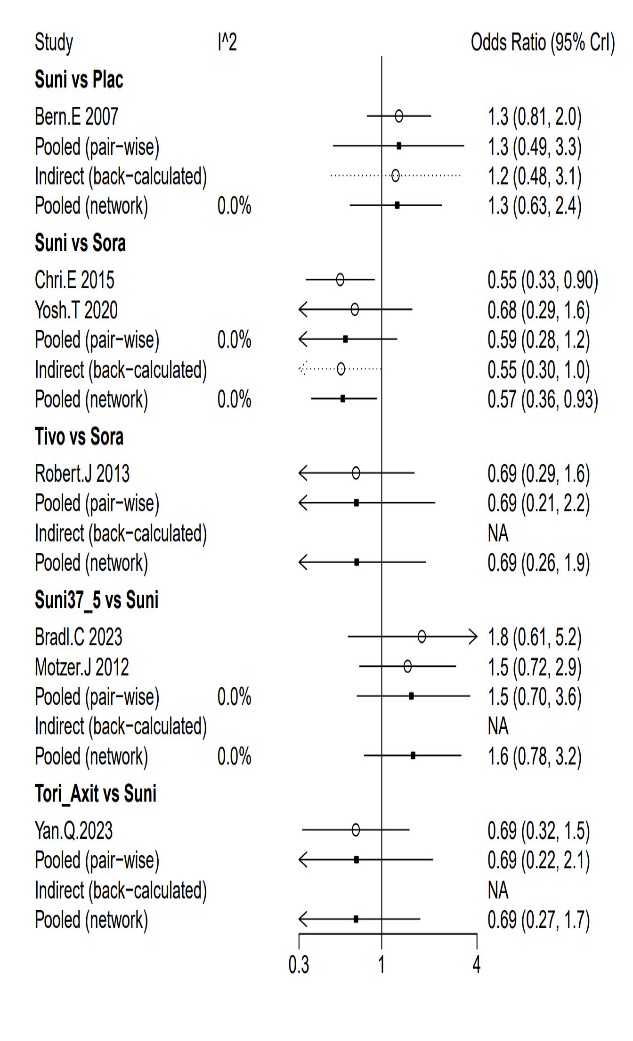


**Supplementary Figure S18** Forest plot of Discontinuations due to AEs heterogeneity


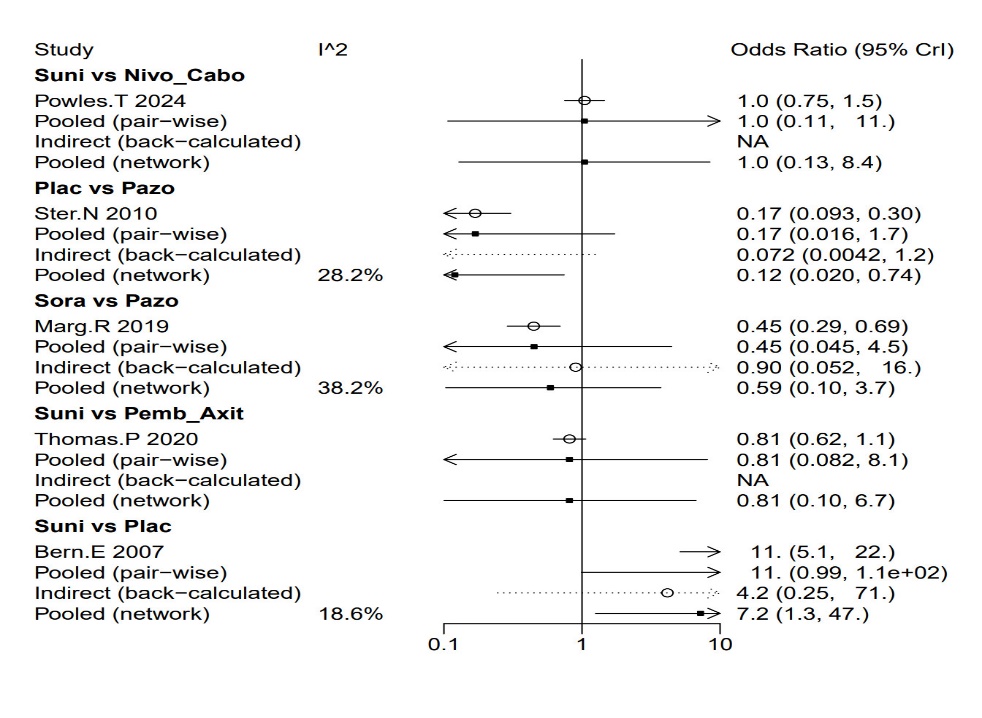

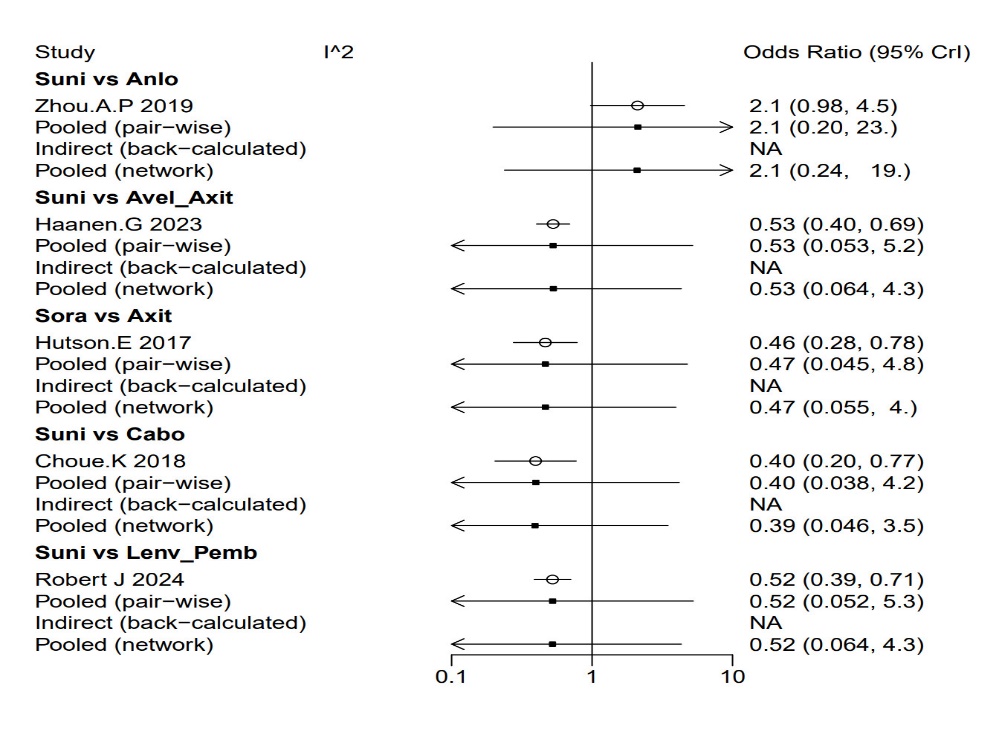

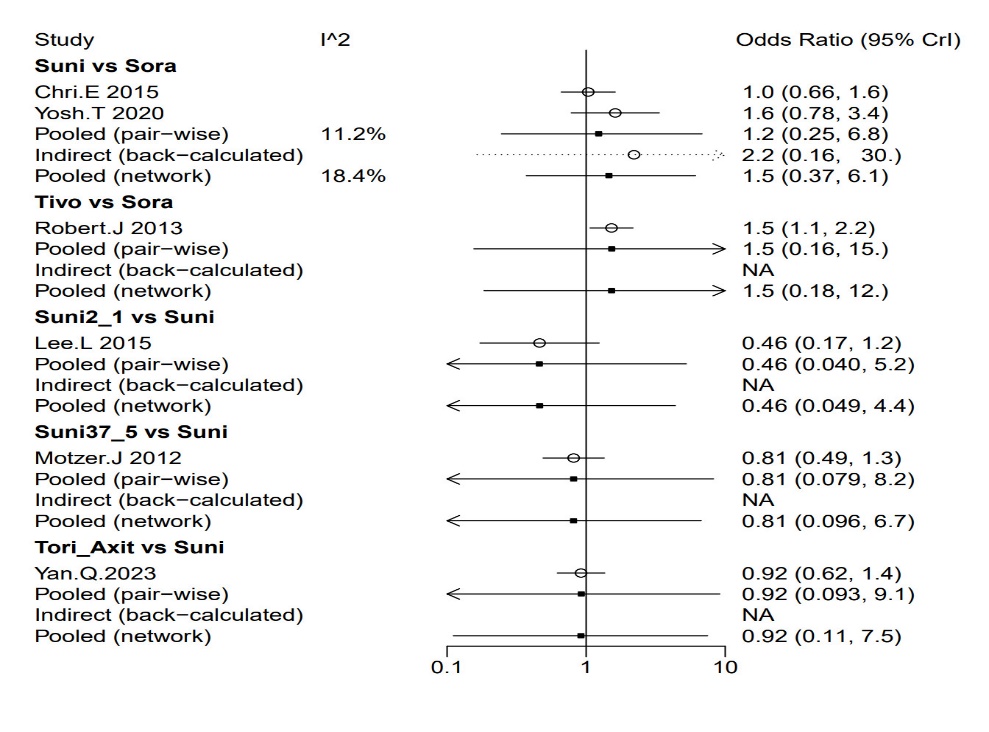


**Supplementary Figure S19** Forest plot of Hypertension heterogeneity


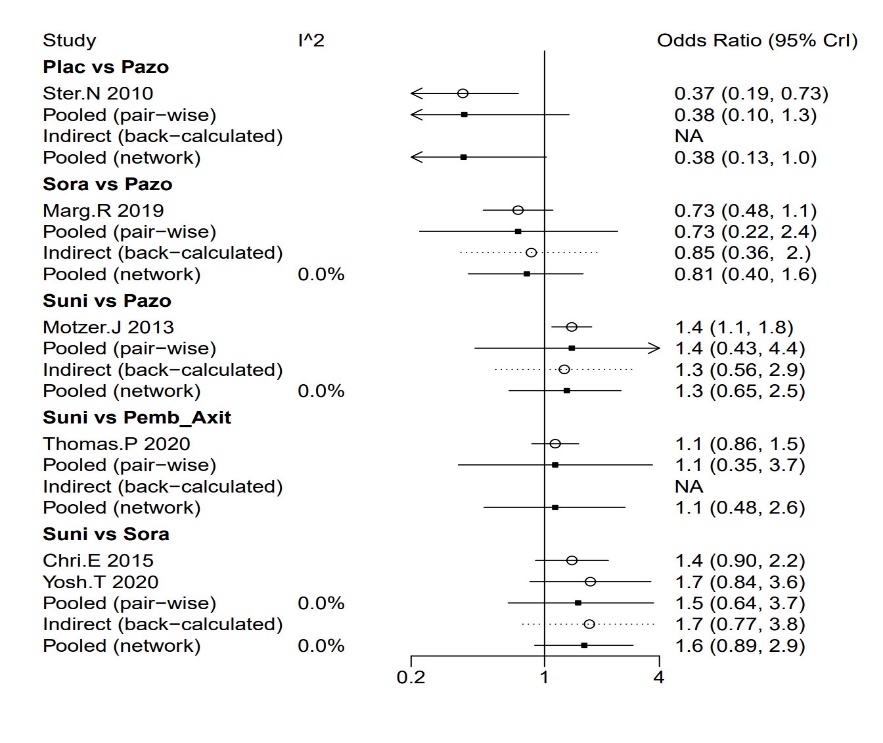

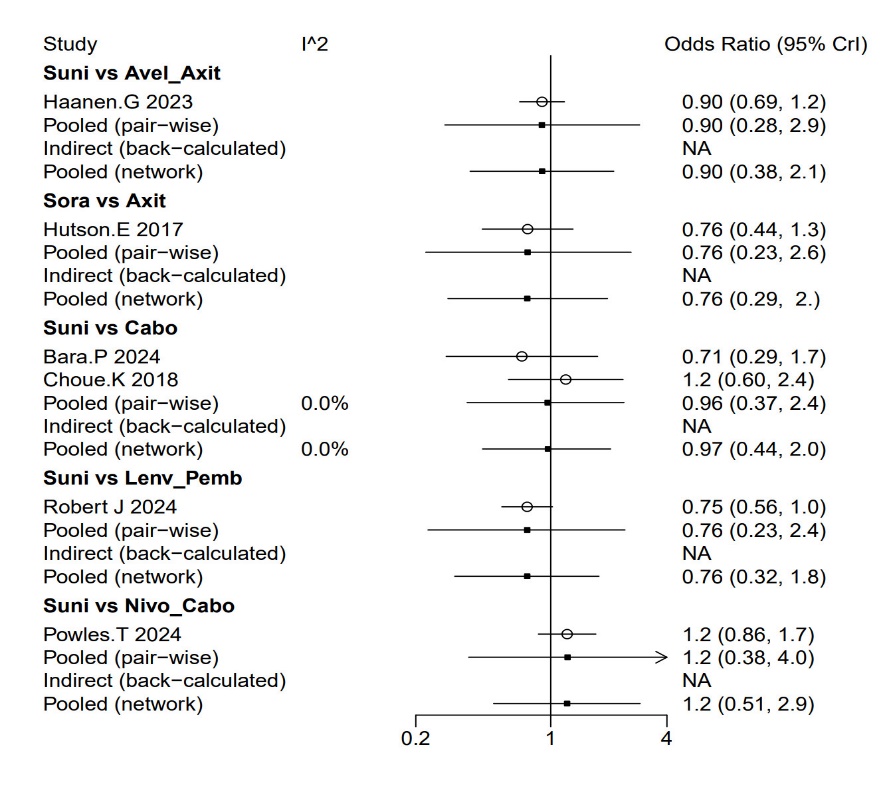


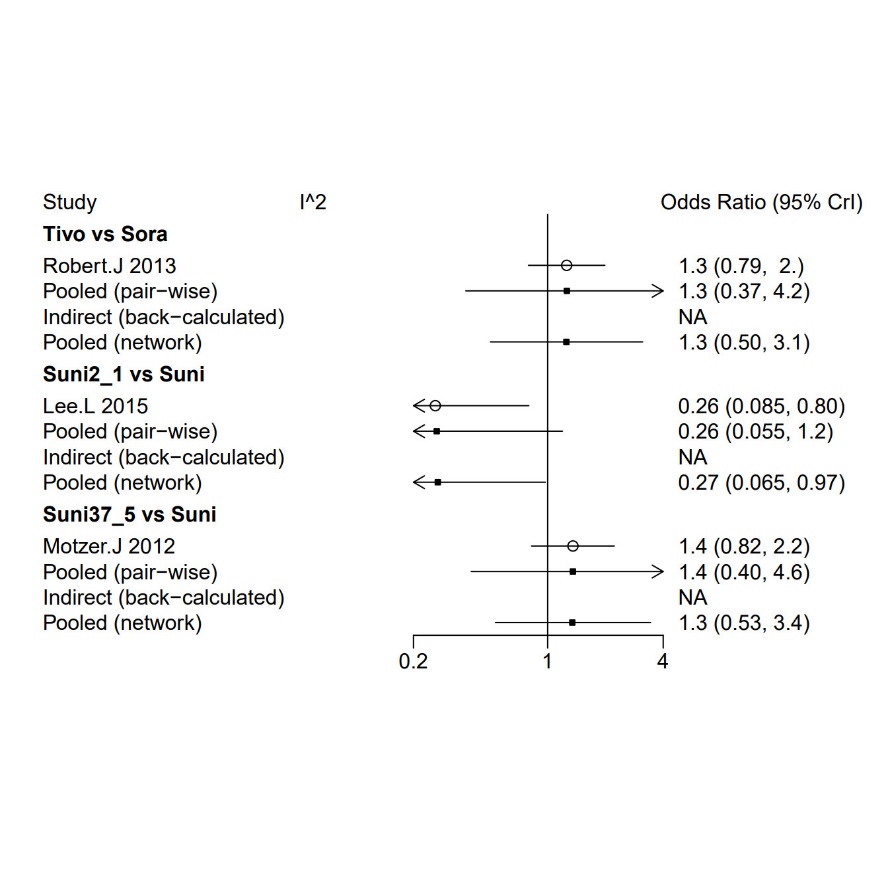


**Supplementary Figure S20** Forest plot of Fatigue heterogeneity


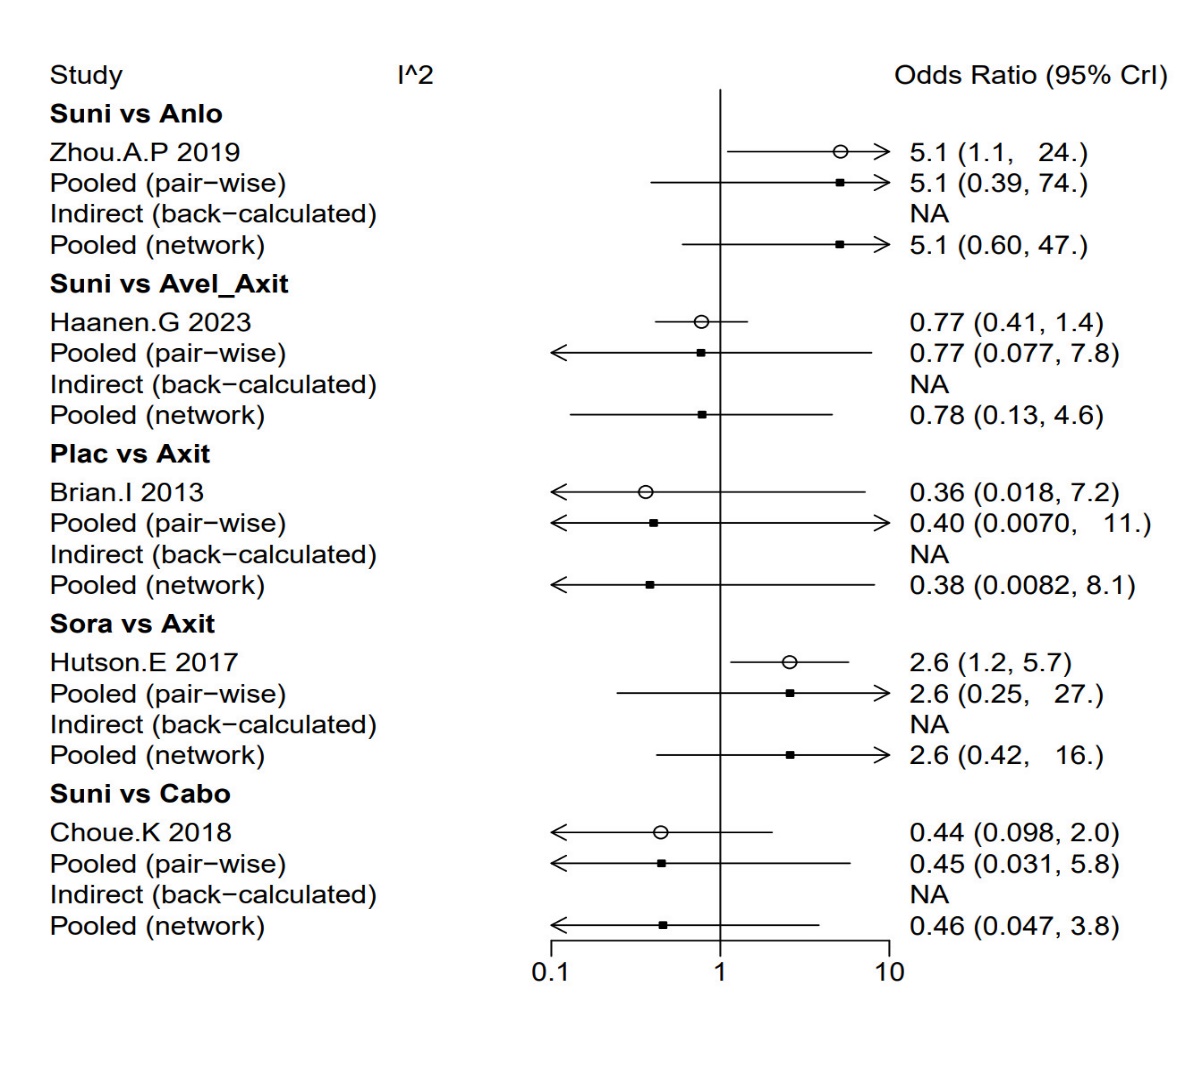


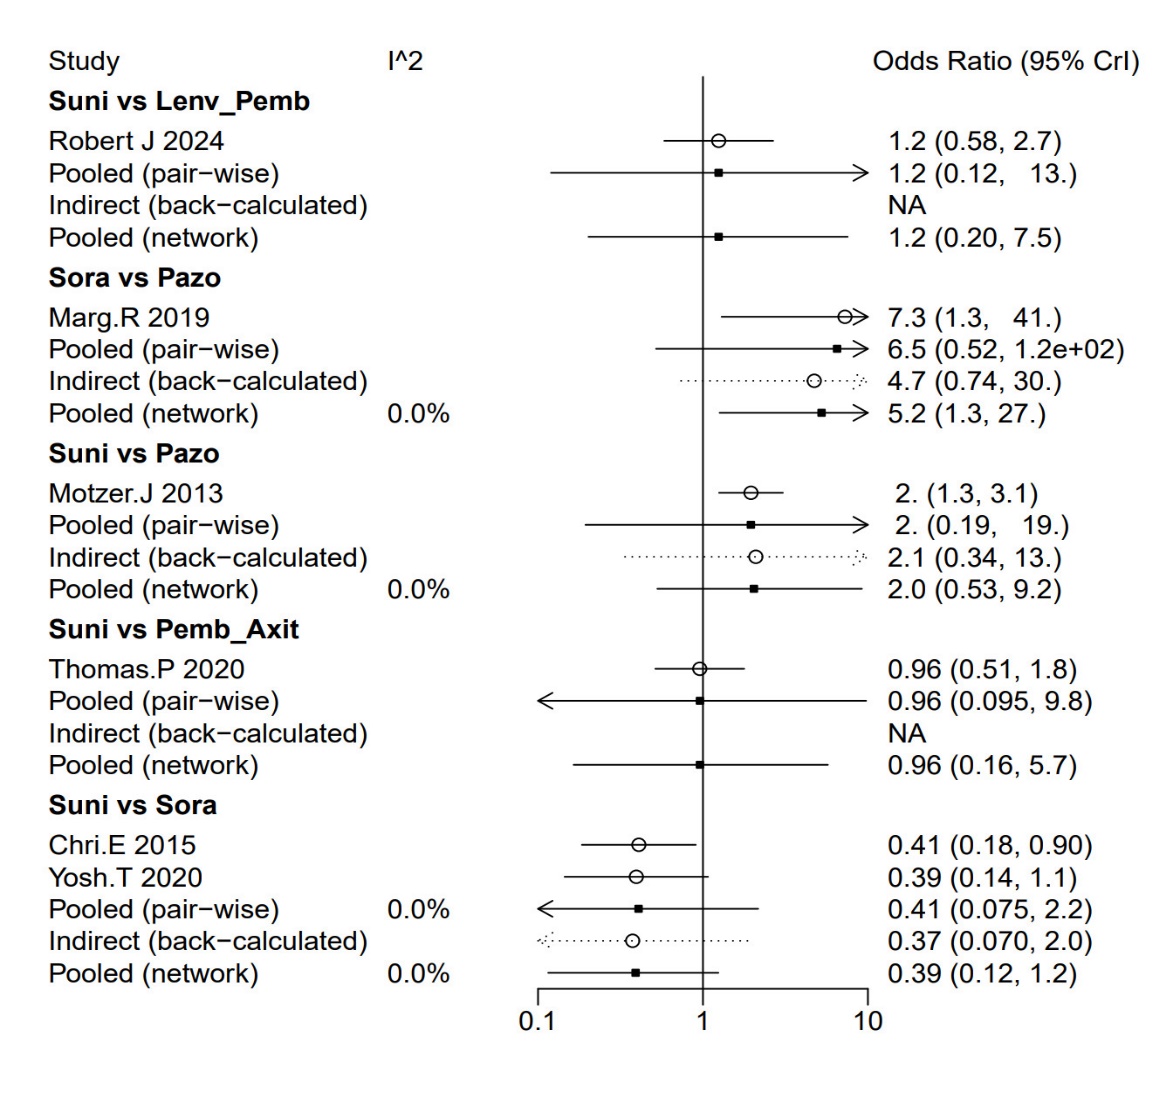


**Supplementary Figure S21** Figure plot of Hand-foot syndrome heterogeneity


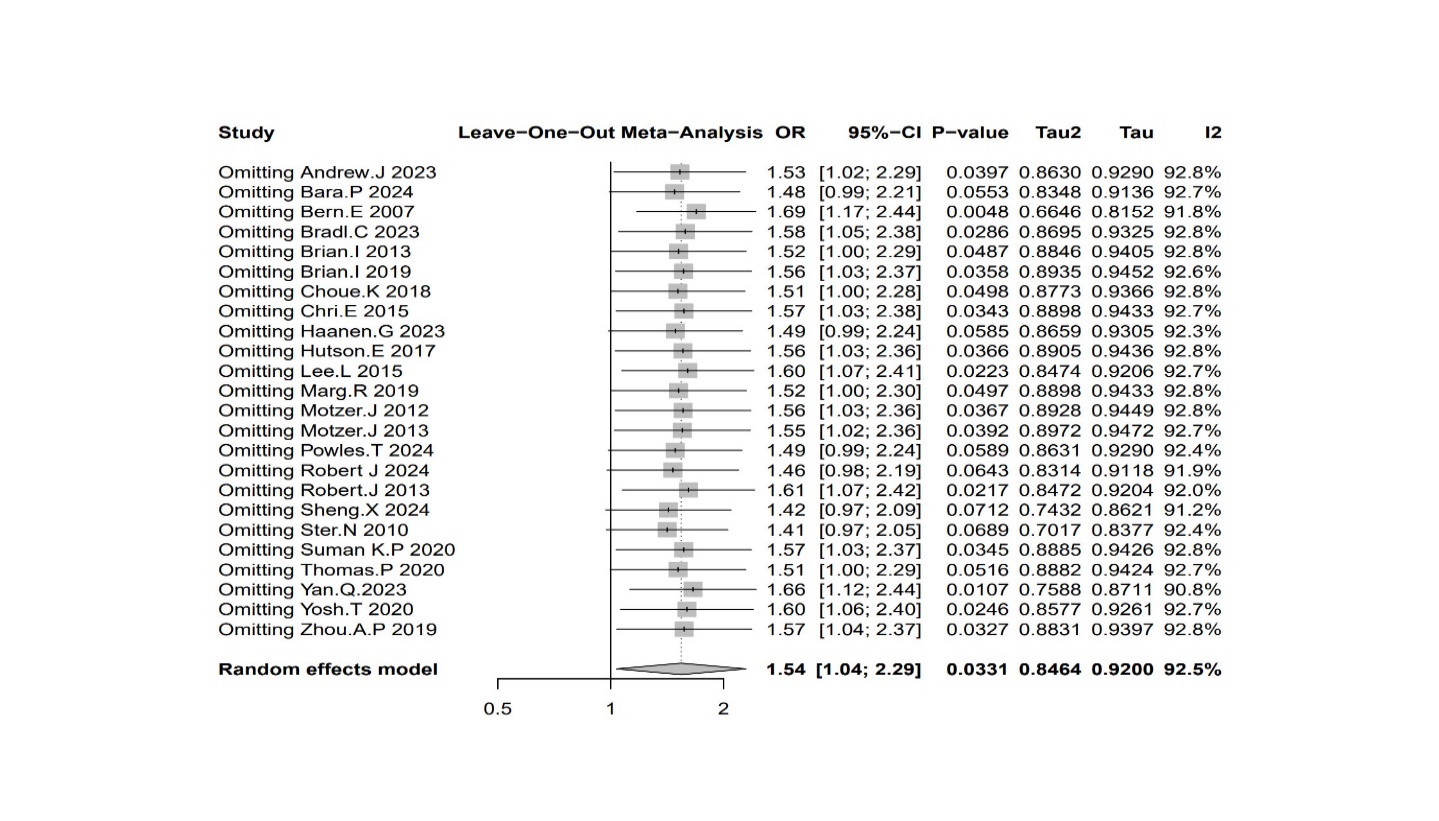


**Supplementary Figure S22** ORR Sensitivity Analysis


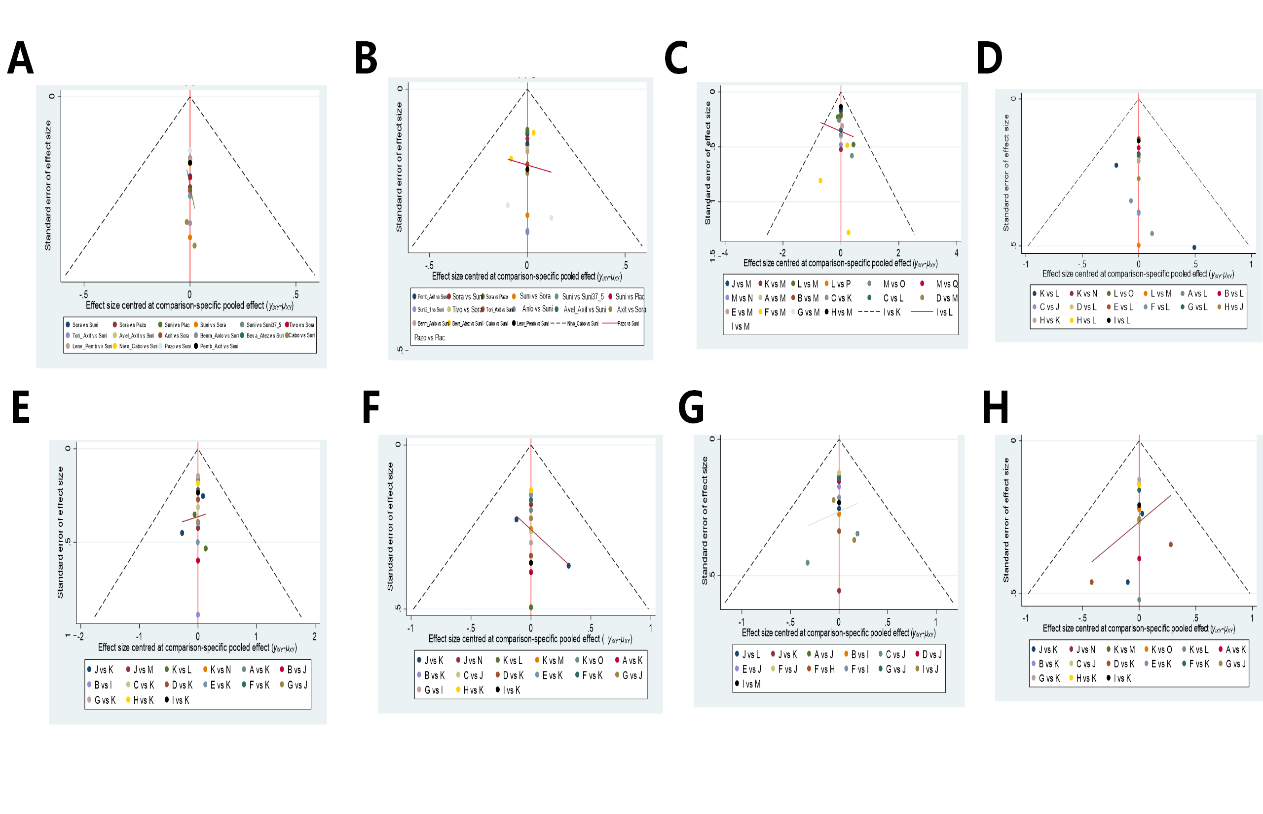


**Supplementary Figure S23** The funnel plot for efficacy and safety: (A)OS; (B)PFS; (C)ORR; (D) Grade ≥3 AEs;(E) Discontinuations due to AEs; (F) Hypertension; (G) Fatigue; (H) Hand-foot syndrome

**Appendix**

**1.PubMed**

#1 randomized controlled trial

(Randomized Controlled Trial [Publication Type]) OR (((("Randomized Controlled Trials as Topic"[Mesh]) OR (Clinical Trials, Randomized[Title/Abstract])) OR (Trials, Randomized Clinical[Title/Abstract])) OR (Controlled Clinical Trials, Randomized[Title/Abstract]))

#2 renal cell carcinoma

("Carcinoma, Renal Cell"[Mesh]) OR ((((((((((((((((((((((((((((((((((((((((((((((Carcinomas, Renal Cell[Title/Abstract]) OR (Renal Cell Carcinomas[Title/Abstract])) OR (Renal Carcinoma[Title/Abstract])) OR (Carcinoma, Renal[Title/Abstract])) OR (Renal Carcinomas[Title/Abstract])) OR (Nephroid Carcinoma[Title/Abstract])) OR (Carcinoma, Nephroid[Title/Abstract])) OR (Nephroid Carcinomas[Title/Abstract])) OR (Adenocarcinoma, Renal Cell[Title/Abstract])) OR (Adenocarcinomas, Renal Cell[Title/Abstract])) OR (Renal Cell Adenocarcinoma[Title/Abstract])) OR (Renal Cell Adenocarcinomas[Title/Abstract])) OR (Renal Cell Carcinoma[Title/Abstract])) OR (Renal Cell Cancer[Title/Abstract])) OR (Cancer, Renal Cell[Title/Abstract])) OR (Renal Cell Cancers[Title/Abstract])) OR (Adenocarcinoma, Renal[Title/Abstract])) OR (Renal Adenocarcinoma[Title/Abstract])) OR (Renal Adenocarcinomas[Title/Abstract])) OR (Adenocarcinoma Of Kidney[Title/Abstract])) OR (Adenocarcinoma Of Kidneys[Title/Abstract])) OR (Kidney, Adenocarcinoma Of[Title/Abstract])) OR (Clear Cell Renal Cell Carcinoma[Title/Abstract])) OR (Carcinoma, Hypernephroid[Title/Abstract])) OR (Hypernephroid Carcinoma[Title/Abstract])) OR (Hypernephroid Carcinomas[Title/Abstract])) OR (Grawitz Tumor[Title/Abstract])) OR (Tumor, Grawitz[Title/Abstract])) OR (Hypernephroma[Title/Abstract])) OR (Hypernephromas[Title/Abstract])) OR (Clear Cell Renal Carcinoma[Title/Abstract])) OR (Papillary Renal Cell Carcinoma[Title/Abstract])) OR (Chromophil Renal Cell Carcinoma[Title/Abstract])) OR (Renal Cell Carcinoma, Papillary[Title/Abstract])) OR (Chromophobe Renal Cell Carcinoma[Title/Abstract])) OR (Collecting Duct Carcinoma (Kidney[Title/Abstract]))) OR (Carcinoma, Collecting Duct (Kidney[Title/Abstract]))) OR (Carcinomas, Collecting Duct (Kidney[Title/Abstract]))) OR (Collecting Duct Carcinomas (Kidney[Title/Abstract]))) OR (Collecting Duct Carcinoma[Title/Abstract])) OR (Carcinoma, Collecting Duct[Title/Abstract])) OR (Carcinomas, Collecting Duct[Title/Abstract])) OR (Collecting Duct Carcinomas[Title/Abstract])) OR (Collecting Duct Carcinoma of the Kidney[Title/Abstract])) OR (Renal Collecting Duct Carcinoma[Title/Abstract])) OR (Sarcomatoid Renal Cell Carcinoma[Title/Abstract]))

#3 medicine

(((((((((("Sorafenib"[Mesh]) OR ((((((((((((((Nexavar[Title/Abstract]) OR (BAY 545-9085[Title/Abstract])) OR (BAY 5459085[Title/Abstract])) OR (BAY 545 9085,[Title/Abstract])) OR (BAY-545-9085[Title/Abstract])) OR (BAY5459085[Title/Abstract])) OR (Sorafenib N-Oxide[Title/Abstract])) OR (Sorafenib N Oxide[Title/Abstract])) OR (BAY-673472[Title/Abstract])) OR (BAY 673472[Title/Abstract])) OR (BAY 43-9006[Title/Abstract])) OR (BAY 439006[Title/Abstract])) OR (BAY 43 9006[Title/Abstract])) OR (Sorafenib Tosylate[Title/Abstract]))) OR (("Sunitinib"[Mesh]) OR ((((((((SU 11248[Title/Abstract]) OR (SU11248[Title/Abstract])) OR (SU-11248[Title/Abstract])) OR (SU 011248[Title/Abstract])) OR (SU-011248[Title/Abstract])) OR (SU011248[Title/Abstract])) OR (Sunitinib Malate[Title/Abstract])) OR (Sutent[Title/Abstract])))) OR ((pazopanib [Supplementary Concept]) OR (((((((GW 780604[Title/Abstract]) OR (GW-780604[Title/Abstract])) OR (GW780604[Title/Abstract])) OR (GW 786034B[Title/Abstract])) OR (GW-786034B[Title/Abstract])) OR (GW786034B[Title/Abstract])) OR (Votrient[Title/Abstract])))) OR (("Axitinib"[Mesh]) OR ((((AG 013736[Title/Abstract]) OR (AG-013736[Title/Abstract])) OR (AG013736[Title/Abstract])) OR (Inlyta[Title/Abstract])))) OR (("Bevacizumab"[Mesh]) OR ((((Avastin[Title/Abstract]) OR (Mvasi[Title/Abstract])) OR (Bevacizumab-awwb[Title/Abstract])) OR (Bevacizumab awwb[Title/Abstract])))) OR (("cabozantinib" [Supplementary Concept]) OR (((((((XL 184[Title/Abstract]) OR (XL-184[Title/Abstract])) OR (XL184 cpd[Title/Abstract])) OR (BMS 907351[Title/Abstract])) OR (BMS-907351[Title/Abstract])) OR (BMS907351[Title/Abstract])) OR (Cometriq[Title/Abstract])))) OR (("lenvatinib" [Supplementary Concept]) OR ((((((((((((E 7080[Title/Abstract]) OR (ER-203492-00[Title/Abstract])) OR (E7080[Title/Abstract])) OR (E-7080[Title/Abstract])) OR (envatinib metabolite M2[Title/Abstract])) OR (lenvatinib mesylate[Title/Abstract])) OR (lenvatinib mesilate[Title/Abstract])) OR (lenvatinib methanesulfonate[Title/Abstract])) OR (monomethanesulfonate[Title/Abstract])) OR (E-7080 mesylate[Title/Abstract])) OR (E7080 mesylate[Title/Abstract])) OR (Lenvima[Title/Abstract])))) OR (("tivozanib" [Supplementary Concept]) OR (((((((AV 951[Title/Abstract]) OR (AV-951[Title/Abstract])) OR (AV951 cpd[Title/Abstract])) OR (KRN 951[Title/Abstract])) OR (KRN-951[Title/Abstract])) OR (KRN951[Title/Abstract])) OR (fotivda[Title/Abstract])))) OR (("aflutinib" [Supplementary Concept]) OR ((((AST2818[Title/Abstract]) OR (furmonertinib mesylate[Title/Abstract])) OR (furmonertinib[Title/Abstract])) OR (Ivesa[Title/Abstract])))) OR (("anlotinib" [Supplementary Concept]) OR (AL3818[Title/Abstract]))

#1AND#2AND#AND

**2.Embase**

Session Results

#30. #23 AND #24 AND #29 1,895 7 May 2025

#29. #25 OR #26 OR #27 OR #28 1,270,323 7 May 2025

#28. 'pragmatic clinical trials as topic' OR 363,022 7 May 2025

'randomized controlled trials' OR 'randomized

controlled trials as topic' OR 'randomized

controlled trial (topic)'

#27. 'randomized controlled trial (topic)'/exp 293,048 7 May 2025

#26. 'controlled trial, randomized' OR 'randomised 233,217 7 May 2025

controlled study' OR 'randomised controlled

trial' OR 'randomized controlled study' OR

'trial, randomized controlled' OR 'randomized

controlled trial':ab,ti

#25. 'randomized controlled trial'/exp 907,120 7 May 2025

#24. #3 OR #4 OR #5 OR #6 OR #7 OR #8 OR #9 OR #10 OR 151,106 7 May 2025

#11 OR #12 OR #13 OR #14 OR #15 OR #16 OR #17 OR

#18 OR #19 OR #20 OR #21 OR #22

#23. #1 OR #2 97,235 7 May 2025

#22. 'al 3818'/exp OR 'al 3818' OR 'al3818'/exp OR 2,783 7 May 2025

'al3818' OR 'anlotinib'/exp OR 'anlotinib' OR

'anlotinib hydrochloride'/exp OR 'anlotinib

hydrochloride' OR 'catequentinib

hydrochloride'/exp OR 'catequentinib

hydrochloride' OR 'focus v (drug)'/exp OR 'focus

v (drug)' OR 'catequentinib'/exp OR

'catequentinib'

#21. 'catequentinib'/exp 2,703 7 May 2025

#20. 'alflutinib'/exp OR 'alflutinib' OR 'alflutinib 288 7 May 2025

mesilate'/exp OR 'alflutinib mesilate' OR

'alflutinib mesylate'/exp OR 'alflutinib

mesylate' OR 'alflutinib methanesulfonate'/exp OR

'alflutinib methanesulfonate' OR 'ast 2818'/exp

OR 'ast 2818' OR 'ast2818'/exp OR 'ast2818' OR

'firmonertinib mesilate'/exp OR 'firmonertinib

mesilate' OR 'firmonertinib mesylate'/exp OR

'firmonertinib mesylate' OR 'firmonertinib

methanesulfonate'/exp OR 'firmonertinib

methanesulfonate' OR 'furmonertinib'/exp OR

'furmonertinib' OR 'ivesa'/exp OR 'ivesa' OR

'firmonertinib'/exp OR 'firmonertinib'

#19. 'firmonertinib'/exp 219 7 May 2025

#18. 'asp 4130'/exp OR 'asp 4130' OR 'asp4130'/exp OR 1,122 7 May 2025

'asp4130' OR 'av 951'/exp OR 'av 951' OR

'av951'/exp OR 'av951' OR 'fotivda'/exp OR

'fotivda' OR 'kil 8951'/exp OR 'kil 8951' OR

'kil8951'/exp OR 'kil8951' OR 'krn 951'/exp OR

'krn 951' OR 'krn951'/exp OR 'krn951' OR

'tivopath'/exp OR 'tivopath' OR 'tivozanib

hydrochloride'/exp OR 'tivozanib hydrochloride'

OR 'tivozanib hydrochloride hydrate'/exp OR

'tivozanib hydrochloride hydrate' OR 'tivozanib

monohydrochloride monohydrate'/exp OR 'tivozanib

monohydrochloride monohydrate' OR 'tivozanib'/exp

OR 'tivozanib'

#17. 'tivozanib'/exp 1,088 7 May 2025

#16. 'aiv 007'/exp OR 'aiv 007' OR 'aiv007'/exp OR 10,186 7 May 2025

'aiv007' OR 'e 7080'/exp OR 'e 7080' OR

'e7080'/exp OR 'e7080' OR 'er 203492-00'/exp OR

'er 203492-00' OR 'er203492-00'/exp OR

'er203492-00' OR 'kisplyx'/exp OR 'kisplyx' OR

'lenvatinib mesilate'/exp OR 'lenvatinib

mesilate' OR 'lenvatinib mesylate'/exp OR

'lenvatinib mesylate' OR 'lenvatinib

methanesulfonate'/exp OR 'lenvatinib

methanesulfonate' OR 'lenvima'/exp OR 'lenvima'

OR 'mk 7902'/exp OR 'mk 7902' OR 'ro 7071618'/exp

OR 'ro 7071618' OR 'ro7071618'/exp OR 'ro7071618'

OR 'lenvatinib'/exp OR 'lenvatinib'

#15. 'lenvatinib'/exp 9,827 7 May 2025

#14. 'bms 907351':ab,ti OR 'bms907351':ab,ti OR 3,871 7 May 2025

'cabometyx':ab,ti OR 'cabozantinib malate':ab,ti

OR 'cabozantinib s malate':ab,ti OR 'cabozantinib

s-malate':ab,ti OR 'cometriq':ab,ti OR 'xl

184':ab,ti OR 'xl184':ab,ti OR

'cabozantinib':ab,ti

#13. 'cabozantinib'/exp 9,336 7 May 2025

#12. ('bevacizumab':ab,ti OR 'abp 215':ab,ti OR 41,507 7 May 2025

'abp215':ab,ti OR 'ainex':ab,ti OR

'altuzan':ab,ti OR 'alymsys':ab,ti OR

'ankeda':ab,ti OR 'ask b1202':ab,ti OR

'askb1202':ab,ti OR 'avastin':ab,ti OR

'avegra':ab,ti OR 'avzivi':ab,ti OR

'aybintio':ab,ti OR 'ba 1101':ab,ti OR

'ba1101':ab,ti OR 'bambevi':ab,ti OR 'bat

1706':ab,ti OR 'bat1706':ab,ti OR 'bcd 021':ab,ti

OR 'bcd021':ab,ti OR 'bevacizumab adcd':ab,ti OR

'bevacizumab awwb':ab,ti OR 'bevacizumab

beta':ab,ti OR 'bevacizumab bvzr':ab,ti OR

'bevacizumab gamma':ab,ti OR 'bevacizumab

maly':ab,ti OR 'bevacizumab tnjn':ab,ti OR

'bevacizumab vikg':ab,ti OR

'bevacizumab-adcd':ab,ti OR

'bevacizumab-awwb':ab,ti OR

'bevacizumab-bvzr':ab,ti OR

'bevacizumab-maly':ab,ti OR

'bevacizumab-tnjn':ab,ti OR

'bevacizumab-vikg':ab,ti OR 'bevagen':ab,ti OR

'bevatas':ab,ti OR 'bevax':ab,ti OR 'bevz

92':ab,ti OR 'bevz92':ab,ti OR 'bi 695502':ab,ti

OR 'bi695502':ab,ti OR 'bow 030':ab,ti OR

'bow030':ab,ti OR 'boyounuo':ab,ti OR 'bp

01':ab,ti OR 'bp 102':ab,ti OR 'bp01':ab,ti OR

'bp102':ab,ti OR 'bryxta':ab,ti OR 'bs

503a':ab,ti OR 'bs503a':ab,ti OR 'bxt 2316':ab,ti

OR 'bxt2316':ab,ti OR 'byvasda':ab,ti OR 'cbt

124':ab,ti OR 'cbt124':ab,ti OR 'chs 305':ab,ti

OR 'chs 5217':ab,ti OR 'chs305':ab,ti OR

'chs5217':ab,ti OR 'cizumab':ab,ti OR 'ct

p16':ab,ti OR 'ctp16':ab,ti OR 'effivia':ab,ti OR

'elovie':ab,ti OR 'equidacent':ab,ti OR 'fkb

238':ab,ti OR 'fkb238':ab,ti OR 'gb 222':ab,ti OR

'gb222':ab,ti OR 'gbs 004':ab,ti OR

'gbs004':ab,ti OR 'hanbeitai':ab,ti OR 'hd

204':ab,ti OR 'hd204':ab,ti OR 'hlx 04':ab,ti OR

'hlx04':ab,ti OR 'hot 1010':ab,ti OR

'hot1010':ab,ti OR 'ibi 305':ab,ti OR

'ibi305':ab,ti OR 'idb 0072':ab,ti OR

'idb0072':ab,ti OR 'intp 24':ab,ti OR

'intp24':ab,ti OR 'ipique':ab,ti OR 'jhl

1149':ab,ti OR 'jhl1149':ab,ti OR 'js 501':ab,ti

OR 'js501':ab,ti OR 'jy 028':ab,ti OR

'jy028':ab,ti OR 'krabeva':ab,ti OR

'kyomarc':ab,ti OR 'lextemy':ab,ti OR

lumiere:ab,ti) AND drug:ab,ti OR 'ly 01008':ab,ti

OR 'ly01008':ab,ti OR 'lytenava':ab,ti OR

'mabionvegf':ab,ti OR 'mb 02':ab,ti OR 'mb 02

dm':ab,ti OR 'mb 02 sp':ab,ti OR 'mb 02sp':ab,ti

OR 'mb02':ab,ti OR 'mb02dm':ab,ti OR

'mb02sp':ab,ti OR 'md02 dm':ab,ti OR 'mil

60':ab,ti OR 'mil60':ab,ti OR 'mvasi':ab,ti OR

'myl 14020':ab,ti OR 'myl 1402o':ab,ti OR

'myl14020':ab,ti OR 'myl1402o':ab,ti OR 'nsc

704865':ab,ti OR 'nsc704865':ab,ti OR

'onbevzi':ab,ti OR 'ons 1045':ab,ti OR 'ons

5010':ab,ti OR 'ons1045':ab,ti OR 'ons5010':ab,ti

OR 'oyavas':ab,ti OR 'pf 06439535':ab,ti OR 'pf

6439535':ab,ti OR 'pf06439535':ab,ti OR

'pf6439535':ab,ti OR 'pmc 901':ab,ti OR

'pmc901':ab,ti OR 'pobevcy':ab,ti OR 'pro

169':ab,ti OR 'pro169':ab,ti OR 'pusintin':ab,ti

OR 'ql 1101':ab,ti OR 'ql1101':ab,ti OR 'r

435':ab,ti OR 'r tpr 023':ab,ti OR 'r435':ab,ti

OR 'rg 435':ab,ti OR 'rg435':ab,ti OR

'rhumab-vegf':ab,ti OR 'ro 4876646':ab,ti OR

'ro4876646':ab,ti OR 'rph 001':ab,ti OR

'rph001':ab,ti OR 'rtpr023':ab,ti OR 'sb 8':ab,ti

OR 'sb8':ab,ti OR 'sct 501':ab,ti OR 'sct

510':ab,ti OR 'sct501':ab,ti OR 'sct510':ab,ti OR

'stc 103':ab,ti OR 'stc103':ab,ti OR

'stivant':ab,ti OR 'tab 008':ab,ti OR 'tab

014':ab,ti OR 'tab008':ab,ti OR 'tab014':ab,ti OR

'tot 102':ab,ti OR 'tot102':ab,ti OR 'trs

003':ab,ti OR 'trs003':ab,ti OR 'tx 16':ab,ti OR

'tx16':ab,ti OR 'vegzelma':ab,ti OR

'versavo':ab,ti OR 'zirabev':ab,ti OR 'zrc

113':ab,ti OR 'zrc113':ab,ti OR 'zybev':ab,ti OR

'bevacizumab':ab,ti

#11. 'bevacizumab'/exp 83,493 7 May 2025

#10. 'ag 013736':ab,ti OR 'ag 13736':ab,ti OR 3,236 7 May 2025

'ag013736':ab,ti OR 'ag13736':ab,ti OR 'ar

14034':ab,ti OR 'ar14034':ab,ti OR 'inlyta':ab,ti

OR 'axitinib':ab,ti

#9. 'axitinib'/exp 8,619 7 May 2025

#8. 'armala':ab,ti OR 'gw 786034':ab,ti OR 'gw 4,757 7 May 2025

786034b':ab,ti OR 'gw 786034x':ab,ti OR

'gw786034':ab,ti OR 'gw786034b':ab,ti OR

'gw786034x':ab,ti OR 'pazopanib

hydrochloride':ab,ti OR 'sb 710468':ab,ti OR 'sb

710468a':ab,ti OR 'sb710468':ab,ti OR

'sb710468a':ab,ti OR 'votrient':ab,ti OR

'pazopanib':ab,ti

#7. 'pazopanib'/exp 12,150 7 May 2025

#6. 'sunitinib'/exp 30,033 7 May 2025

#5. 'gb 102':ab,ti OR 'gb 103':ab,ti OR 'gb102':ab,ti 13,976 7 May 2025

OR 'gb103':ab,ti OR 'pha 2909040ad':ab,ti OR 'pha

290940ad':ab,ti OR 'pha2909040ad':ab,ti OR

'pha290940ad':ab,ti OR 'pnu 290940':ab,ti OR

'pnu290940':ab,ti OR 'su 010398':ab,ti OR 'su

011248':ab,ti OR 'su 10398':ab,ti OR 'su

11248':ab,ti OR 'su010398':ab,ti OR

'su011248':ab,ti OR 'su10398':ab,ti OR

'su11248':ab,ti OR 'sunitinib cyclamate':ab,ti OR

'sunitinib hydrochloride':ab,ti OR 'sunitinib

malate':ab,ti OR 'suo 11248':ab,ti OR

'suo11248':ab,ti OR 'sutent':ab,ti OR

'sunitinib':ab,ti

#4. 'bay 43 9006':ab,ti OR 'bay 43-9006':ab,ti OR 22,260 7 May 2025

'bay 439006':ab,ti OR 'bay 54 9085':ab,ti OR 'bay

549085':ab,ti OR 'bay43 9006':ab,ti OR

'bay43-9006':ab,ti OR 'bay439006':ab,ti OR 'bay54

9085':ab,ti OR 'bay549085':ab,ti OR

'fenesa':ab,ti OR 'hynap-sora':ab,ti OR

'nexavar':ab,ti OR 'reniloxa':ab,ti OR

'revamox':ab,ti OR 'rexanib':ab,ti OR

'sorafeb':ab,ti OR 'sorafenib tosilate':ab,ti OR

'sorafenib tosylate':ab,ti OR 'soratina':ab,ti OR

'weldinin':ab,ti OR 'sorafenib':ab,ti

#3. 'sorafenib'/exp 42,370 7 May 2025

#2. ('adenocarcinoma of the kidney':ab,ti OR 78,593 7 May 2025

'adenocarcinoma, kidney':ab,ti OR 'carcinoma,

renal cell':ab,ti OR 'grawitz tumor':ab,ti OR

'grawitz tumour':ab,ti OR 'grawitz`s tumor':ab,ti

OR 'grawitz`s tumour':ab,ti OR

'hyper-nephroma':ab,ti OR 'hypernephroid

cancer':ab,ti OR 'hypernephroid carcinoma':ab,ti

OR 'hypernephroma':ab,ti OR kidney:ab,ti) AND

'renal cell':ab,ti AND cancer:ab,ti OR 'kidney

adenocarcinoma':ab,ti OR 'kidney cell

adenocarcinoma':ab,ti OR 'kidney cell

cancer':ab,ti OR 'kidney cell carcinoma':ab,ti OR

'kidney hypernephroma':ab,ti OR 'renal

adenocarcinoma':ab,ti OR 'renal cell

adenocarcinoma':ab,ti OR 'renal cell

cancer':ab,ti OR 'renal cell carcinoma':ab,ti

#1. 'renal cell carcinoma'/exp 48,358 7 May 2025

**3．Cochrane library**

ID Search Hits

#1 MeSH descriptor: [Carcinoma, Renal Cell] explode all trees 1582

#2 "Carcinoma, Renal Cell" OR " Carcinomas, Renal Cell" OR " Renal Cell Carcinomas" OR " Renal Carcinoma" OR " Carcinoma, Renal" OR " Renal Carcinomas" OR " Nephroid Carcinoma" OR "Carcinoma, Nephroid" OR "Nephroid Carcinomas" OR " Adenocarcinoma, Renal Cell" OR " Adenocarcinomas, Renal Cell" OR " Renal Cell Adenocarcinoma" OR " Renal Cell Adenocarcinomas" OR " Renal Cell Carcinoma" OR " Renal Cell Cancer" OR " Cancer, Renal Cell" OR " Renal Cell Cancers" OR " Adenocarcinoma, Renal" OR " Renal Adenocarcinoma" OR " Renal Adenocarcinomas" OR " Adenocarcinoma Of Kidney" OR " Adenocarcinoma Of Kidneys" OR " Kidney, Adenocarcinoma Of" OR " Clear Cell Renal Cell Carcinoma" OR " Carcinoma, Hypernephroid" OR " Hypernephroid Carcinoma" OR " Hypernephroid Carcinomas" OR " Grawitz TumOR " OR " TumOR , Grawitz" OR " Hypernephroma" OR " Hypernephromas" OR " Clear Cell Renal Carcinoma" OR " Papillary Renal Cell Carcinoma" OR " Chromophil Renal Cell Carcinoma" OR " Renal Cell Carcinoma, Papillary" OR " Chromophobe Renal Cell Carcinoma" OR " Collecting Duct Carcinoma Kidney" OR " Carcinoma, Collecting Duct Kidney" OR " Carcinomas, Collecting Duct Kidney" OR " Collecting Duct Carcinomas Kidney" OR " Collecting Duct Carcinoma" OR " Carcinoma, Collecting Duct" OR " Carcinomas, Collecting Duct" OR " Collecting Duct Carcinomas" OR "Collecting Duct Carcinoma of the Kidney" OR " Renal Collecting Duct Carcinoma" OR " Sarcomatoid Renal Cell Carcinoma" 3772

#3 MeSH descriptor: [Sorafenib] explode all trees 720

#4 ("Nexavar" OR " BAY 545-9085" OR " BAY 5459085" OR " BAY 545 9085," OR " BAY-545-9085" OR " BAY5459085" OR " Sorafenib N-Oxide" OR " Sorafenib N Oxide" OR " BAY-673472" OR " BAY 673472" OR " BAY 43-9006" OR " BAY 439006" OR " BAY 43 9006" OR " Sorafenib Tosylate"):ti,ab,kw 218

#5 MeSH descriptor: [Sunitinib] explode all trees 512

#6 ("SU 11248" OR " SU11248" OR " SU-11248" OR " SU 011248" OR " SU-011248" OR " SU011248" OR " Sunitinib Malate" OR " Sutent"):ti,ab,kw 193

#7 ("pazopanib" OR "GW 780604" OR "GW-780604" OR "GW780604" OR "GW 786034B" OR "GW-786034B" OR "GW786034B" OR "Votrient"):ti,ab,kw 652

#8 MeSH descriptor: [Axitinib] explode all trees 160

#9 ("AG 013736" OR "AG-013736" OR "AG013736" OR "Inlyta"):ti,ab,kw 55

#10 MeSH descriptor: [Bevacizumab] explode all trees 3059

#11 ("Mvasi" OR "Bevacizumab-awwb" OR "Bevacizumab awwb" OR "Avastin"):ti,ab,kw 971

#12 ("cabozantinib" OR "XL 184" OR "XL-184" OR "XL184 cpd" OR "BMS 907351" OR "BMS-907351" OR "BMS907351" OR "Cometriq"):ti,ab,kw 592

#13 ("lenvatinib" OR "E 7080" OR "ER-203492-00" OR "E7080" OR "E-7080" OR "envatinib metabolite M2" OR "lenvatinib mesylate" OR "lenvatinib mesilate" OR "lenvatinib methanesulfonate" OR "monomethanesulfonate" OR "E-7080 mesylate" OR "E7080 mesylate" OR "Lenvima"):ti,ab,kw 779

#14 ("tivozanib" OR "AV 951" OR "AV-951" OR "AV951 cpd" OR "KRN 951" OR "KRN-951" OR "KRN951" OR "fotivda"):ti,ab,kw 100

#15 ("anlotinib" OR "AL3818"):ti,ab,kw 377

#16 ("aflutinib" OR "AST2818" OR "furmonertinib mesylate" OR "Ivesa" OR "Anlotinibanlotinib "):ti,ab,kw 17

#17 #1 OR #2 3772

#18 #3 OR #4 OR #5 OR #6 OR #7 OR #8 OR #9 OR #10 OR #11 OR #12 OR #13 OR #14 OR #15 OR #16 7425

#19 #17 AND #18 1198

4.**Web of Science**

#1"Carcinoma, Renal Cell" OR " Carcinomas, Renal Cell" OR " Renal Cell Carcinomas" OR " Renal Carcinoma" OR " Carcinoma, Renal" OR " Renal Carcinomas" OR " Nephroid Carcinoma" OR "Carcinoma, Nephroid" OR "Nephroid Carcinomas" OR " Adenocarcinoma, Renal Cell" OR " Adenocarcinomas, Renal Cell" OR " Renal Cell Adenocarcinoma" OR " Renal Cell Adenocarcinomas" OR " Renal Cell Carcinoma" OR " Renal Cell Cancer" OR " Cancer, Renal Cell" OR " Renal Cell Cancers" OR " Adenocarcinoma, Renal" OR " Renal Adenocarcinoma" OR " Renal Adenocarcinomas" OR " Adenocarcinoma Of Kidney" OR " Adenocarcinoma Of Kidneys" OR " Kidney, Adenocarcinoma of" OR " Clear Cell Renal Cell Carcinoma" OR " Carcinoma, Hypernephroid" OR " Hypernephroid Carcinoma" OR " Hypernephroid Carcinomas" OR " Grawitz TumOR " OR " Hypernephroma" OR " Hypernephromas" OR " Clear Cell Renal Carcinoma" OR " Papillary Renal Cell Carcinoma" OR " Chromophil Renal Cell Carcinoma" OR " Renal Cell Carcinoma, Papillary" OR " Chromophobe Renal Cell Carcinoma" OR " Collecting Duct Carcinoma Kidney" OR " Carcinoma, Collecting Duct Kidney" OR " Carcinomas, Collecting Duct Kidney" OR " Collecting Duct Carcinomas Kidney" OR " Collecting Duct Carcinoma" OR " Carcinoma, Collecting Duct" OR " Carcinomas, Collecting Duct" OR " Collecting Duct Carcinomas" OR "Collecting Duct Carcinoma of the Kidney" OR " Renal Collecting Duct Carcinoma" OR " Sarcomatoid Renal Cell Carcinoma"

#2

"Nexavar" OR " BAY 545-9085" OR " BAY 5459085" OR " BAY 545 9085," OR " BAY-545-9085" OR " BAY5459085" OR " Sorafenib N-Oxide" OR " Sorafenib N Oxide" OR " BAY-673472" OR " BAY 673472" OR " BAY 43-9006" OR " BAY 439006" OR " BAY 43 9006" OR " Sorafenib Tosylate" OR "SU 11248" OR " SU11248" OR " SU-11248" OR " SU 011248" OR " SU-011248" OR " SU011248" OR " Sunitinib Malate" OR " Sutent" OR "pazopanib" OR "GW 780604" OR "GW-780604" OR "GW780604" OR "GW 786034B" OR "GW-786034B" OR "GW786034B" OR "Votrient" OR "AG 013736" OR "AG-013736" OR "AG013736" OR "Inlyta" OR "Mvasi" OR "Bevacizumab-awwb" OR "Bevacizumab awwb" OR "Avastin" OR "cabozantinib" OR "XL 184" OR "XL-184" OR "XL184 cpd" OR "BMS 907351" OR "BMS-907351" OR "BMS907351" OR "Cometriq" OR "lenvatinib" OR "E 7080" OR "ER-203492-00" OR "E7080" OR "E-7080" OR "envatinib metabolite M2" OR "lenvatinib mesylate" OR "lenvatinib mesilate" OR "lenvatinib methanesulfonate" OR "monomethanesulfonate" OR "E-7080 mesylate" OR "E7080 mesylate" OR "Lenvima" OR "tivozanib" OR "AV 951" OR "AV-951" OR "AV951 cpd" OR "KRN 951" OR "KRN-951" OR "KRN951" OR "fotivda" OR "aflutinib" OR "AST2818" OR "furmonertinib mesylate" OR "Ivesa" OR "Anlotinibanlotinib " OR "anlotinib" OR "AL3818" OR "Bevacizumab" OR " Axitinib " OR " Sunitinib " OR " Sorafenib "

#3

"Randomized Controlled Trial" OR "Randomized Controlled Trials as Topic" OR "Clinical Trials, Randomized" OR "Trials, Randomized Clinical" OR "Controlled Clinical Trials, Randomized"

#1AND#2AND#AND
